# Supplementary material for: Significance of the Identification in the Horn of Africa of an Exceptionally Deep Branching Mycobacterium tuberculosis Clade
Source: PLoS One. 2012 Dec 27;7(12):e52841. doi: 10.1371/journal.pone.0052841 (PMC3531362; doi:10.1371/journal.pone.0052841)
Supplement: Table S3 — List of 13358 SNP positions. For each SNP the branch(es) in which they occurred is indicated. Nodes numbering is as indicated in Figure 7. When an SNP occurs in a region of overlap between two annotated open reading frames, both amino acid changes are indicated. (XLS) [file pone.0052841.s004.xls]

## Sheet: TableS2
Index	Pos	Type	DNA	AA	Label	Locus_tag	1st_occurence	2nd_occurence	3rd_occurence	4th_occurence	5th_occurence	6th_occurence	7h_occurence
s1	36	silent	g->a		chromosomal replication initiation protein	Rv0001	branch_(81, 58)
s2	467	missense	a->g	H->R	chromosomal replication initiation protein	Rv0001	branch_(5, 3)
s3	970	missense	t->g	W->G	chromosomal replication initiation protein	Rv0001	branch_(47, 38)
s4	1057	missense	g->a	V->I	chromosomal replication initiation protein	Rv0001	branch_(4, 3)
s5	1302	silent	c->a		chromosomal replication initiation protein	Rv0001	branch_(78, 77)
s6	1667	intergenic	c->a			IG-Rv0001-Rv0002	branch_(68, 12)
s7	1701	intergenic	t->c			IG-Rv0001-Rv0002	branch_(28, 27)
s8	1742	intergenic	g->a			IG-Rv0001-Rv0002	branch_(36, 25)
s9	1756	intergenic	c->t			IG-Rv0001-Rv0002	branch_(73, 71)
s10	1821	intergenic	g->t			IG-Rv0001-Rv0002	branch_(28, 27)
s11	1849	intergenic	c->a, c->t			IG-Rv0001-Rv0002	branch_(10, 9)	branch_(57, 43)
s12	1946	intergenic	c->a			IG-Rv0001-Rv0002	branch_(61, 59)
s13	1960	intergenic	g->c			IG-Rv0001-Rv0002	branch_(82, 8)
s14	1977	intergenic	a->g			IG-Rv0001-Rv0002	branch_(52, 21)
s15	2347	missense	a->g	D->G	DNA polymerase III subunit beta	Rv0002	branch_(5, 3)
s16	2532	silent	t->c		DNA polymerase III subunit beta	Rv0002	branch_(9, 8)
s17	2586	missense	g->t	A->S	DNA polymerase III subunit beta	Rv0002	branch_(40, 24)
s18	2822	missense	g->t	E->D	DNA polymerase III subunit beta	Rv0002	branch_(65, 63)
s19	3192	missense	a->g	N->D	DNA polymerase III subunit beta	Rv0002	branch_(59, 58)
s20	3446	missense	c->t	A->V	recombination protein F	Rv0003	branch_(62, 10)
s21	3452	missense	t->c	L->S	recombination protein F	Rv0003	branch_(59, 58)
s22	3523	missense	g->t	A->S	recombination protein F	Rv0003	branch_(45, 44)
s23	3751	missense	t->g	L->V	recombination protein F	Rv0003	branch_(5, 3)
s24	4013	missense	t->c	I->T	recombination protein F	Rv0003	branch_(52, 21)
s25	4393	missense	g->a	V->M	recombination protein F	Rv0003	branch_(57, 43)
s26	4480	missense	c->t	S->L	hypothetical protein	Rv0004	branch_(4, 3)
s27	5072	intergenic	g->t			IG-Rv0004-Rv0005	branch_(57, 43)
s28	5520	missense	c->t	P->L	DNA gyrase subunit B	Rv0005	branch_(36, 25)
s29	5752	silent	g->a		DNA gyrase subunit B	Rv0005	branch_(5, 3)
s30	6112	missense	g->c	M->I	DNA gyrase subunit B	Rv0005	branch_(69, 7)
s31	6124	silent	c->t		DNA gyrase subunit B	Rv0005	branch_(74, 70)
s32	6406	silent	c->t		DNA gyrase subunit B	Rv0005	branch_(5, 3)
s33	6446	missense	g->t	A->S	DNA gyrase subunit B	Rv0005	branch_(7, 6)
s34	6610	silent	c->a		DNA gyrase subunit B	Rv0005	branch_(50, 38)
s35	6817	silent	g->a		DNA gyrase subunit B	Rv0005	branch_(35, 26)
s36	7222	silent	c->t		DNA gyrase subunit B	Rv0005	branch_(36, 25)
s37	7362	missense	g->c	E->Q	DNA gyrase subunit A	Rv0006	branch_(52, 21)
s38	7539	missense	a->g	T->A	DNA gyrase subunit A	Rv0006	branch_(41, 22)
s39	7570	missense	c->t	A->V	DNA gyrase subunit A	Rv0006	branch_(32, 30)
s40	7582	missense	a->g	D->G	DNA gyrase subunit A	Rv0006	branch_(18, 16)
s41	7585	missense	g->c	S->T	DNA gyrase subunit A	Rv0006	branch_(52, 21)
s42	7914	missense	c->a	L->M	DNA gyrase subunit A	Rv0006	branch_(47, 38)
s43	8040	missense	g->a	G->S	DNA gyrase subunit A	Rv0006	branch_(27, 26)
s44	8075	missense	g->t	E->D	DNA gyrase subunit A	Rv0006	branch_(61, 59)
s45	8188	missense	t->c	L->P	DNA gyrase subunit A	Rv0006	branch_(80, 70)
s46	8285	silent	c->t		DNA gyrase subunit A	Rv0006	branch_(5, 3)
s47	8337	missense	c->g	L->V	DNA gyrase subunit A	Rv0006	branch_(45, 44)
s48	8452	missense	c->t	A->V	DNA gyrase subunit A	Rv0006	branch_(69, 7)
s49	8493	missense	c->t	L->F	DNA gyrase subunit A	Rv0006	branch_(43, 37)
s50	8624	silent	g->t		DNA gyrase subunit A	Rv0006	branch_(3, 0)
s51	8741	silent	c->t		DNA gyrase subunit A	Rv0006	branch_(5, 3)
s52	8842	missense	a->g	E->G	DNA gyrase subunit A	Rv0006	branch_(68, 12)
s53	8876	silent	c->t		DNA gyrase subunit A	Rv0006	branch_(82, 8)
s54	9143	silent	t->c		DNA gyrase subunit A	Rv0006	branch_(9, 8)
s55	9217	missense	a->c	D->A	DNA gyrase subunit A	Rv0006	branch_(4, 3)
s56	9260	silent	g->c		DNA gyrase subunit A	Rv0006	branch_(77, 69)
s57	9304	missense	g->a	G->D	DNA gyrase subunit A	Rv0006	branch_(52, 21)
s58	9566	silent	c->t		DNA gyrase subunit A	Rv0006	branch_(58, 6)
s59	9596	silent	g->t		DNA gyrase subunit A	Rv0006	branch_(64, 62)
s60	10727	missense	a->g	I->V	hypothetical protein	Rv0007	branch_(4, 3)
s61	10819	silent	c->t		hypothetical protein	Rv0007	branch_(38, 37)
s62	10846	intergenic	g->a			IG-Rv0007-Rv0008c	branch_(34, 15)
s63	10972	intergenic	c->t			IG-Rv0007-Rv0008c	branch_(68, 12)
s64	10986	intergenic	g->a			IG-Rv0007-Rv0008c	branch_(72, 71)
s65	10993	intergenic	t->c			IG-Rv0007-Rv0008c	branch_(81, 58)
s66	11243	intergenic	g->t			IG-Rv0007-Rv0008c	branch_(79, 77)
s67	11370	intergenic	c->t			IG-Rv0007-Rv0008c	branch_(23, 19)
s68	11718	intergenic	g->a			IG-Rv0007-Rv0008c	branch_(74, 70)
s69	11740	intergenic	a->g			IG-Rv0007-Rv0008c	branch_(73, 71)
s70	11800	intergenic	t->g			IG-Rv0007-Rv0008c	branch_(76, 74)
s71	11820	intergenic	c->g			IG-Rv0007-Rv0008c	branch_(11, 10)
s72	11846	intergenic	c->g			IG-Rv0007-Rv0008c	branch_(60, 59)
s73	11879	intergenic	a->g			IG-Rv0008c-Rv0009	branch_(52, 21)
s74	12204	missense	g->a	E->K	iron-regulated peptidyl-prolyl cis-trans isomerase A	Rv0008c	branch_(62, 10)
s75	12234	missense	c->g	R->G	iron-regulated peptidyl-prolyl cis-trans isomerase A	Rv0008c	branch_(74, 70)
s76	12257	silent	g->a		iron-regulated peptidyl-prolyl cis-trans isomerase A	Rv0008c	branch_(57, 43)
s77	12521	silent	g->a		iron-regulated peptidyl-prolyl cis-trans isomerase A	Rv0009	branch_(61, 59)
s78	12854	silent	c->t		iron-regulated peptidyl-prolyl cis-trans isomerase A	Rv0009	branch_(80, 70)
s79	12959	silent	c->g		iron-regulated peptidyl-prolyl cis-trans isomerase A	Rv0009	branch_(57, 43)
s80	13100	intergenic	c->t			IG-Rv0009-Rv0010c	branch_(71, 70)
s81	13175	silent	a->g		hypothetical protein	Rv0010c	branch_(77, 69)
s82	13197	silent	g->c		hypothetical protein	Rv0010c	branch_(5, 3)
s83	13275	missense	t->c	Y->C	hypothetical protein	Rv0010c	branch_(71, 70)
s84	13277	silent	a->g		hypothetical protein	Rv0010c	branch_(64, 62)
s85	13298	missense	g->c	I->M	hypothetical protein	Rv0010c	branch_(69, 7)
s86	13445	silent	c->t		hypothetical protein	Rv0010c	branch_(82, 8)
s87	13482	missense	g->a	A->V	hypothetical protein	Rv0010c	branch_(37, 5)	branch_(71, 70)
s88	13563	missense	t->c	E->G	hypothetical protein	Rv0010c	branch_(82, 8)
s89	13579	missense	c->t	V->M	hypothetical protein	Rv0010c	branch_(59, 58)
s90	13729	silent	c->t		septation inhibitor protein	Rv0011c	branch_(80, 70)
s91	14023	intergenic	c->t			IG-Rv0011c-Rv0012	branch_(46, 44)
s92	14251	missense	g->a	D->N	hypothetical protein	Rv0012	branch_(25, 20)
s93	14785	missense	t->c	C->R	hypothetical protein	Rv0012	branch_(56, 53)
s94	14806	silent	t->c		hypothetical protein	Rv0012	branch_(82, 8)
s95	14861	missense	g->t	G->V	hypothetical protein	Rv0012	branch_(11, 10)
s96	15087	intergenic	c->g			IG-Rv0013-Rv0014c	branch_(18, 16)
s97	15088	intergenic	c->t			IG-Rv0013-Rv0014c	branch_(77, 69)
s98	15117	intergenic	c->g			IG-Rv0013-Rv0014c	branch_(19, 9)
s99	15177	intergenic	c->g			IG-Rv0013-Rv0014c	branch_(80, 70)
s100	15225	intergenic	g->a			IG-Rv0013-Rv0014c	branch_(36, 25)
s101	15735	missense	c->t	R->H	Ser/Thr protein kinase B PKNB (protein kinase B) (STPK B)	Rv0014c	branch_(82, 8)
s102	15787	missense	c->g	V->L	Ser/Thr protein kinase B PKNB (protein kinase B) (STPK B)	Rv0014c	branch_(72, 71)
s103	15890	silent	g->a		Ser/Thr protein kinase B PKNB (protein kinase B) (STPK B)	Rv0014c	branch_(48, 13)
s104	15900	missense	g->a	S->L	Ser/Thr protein kinase B PKNB (protein kinase B) (STPK B)	Rv0014c	branch_(72, 71)
s105	16055	silent	c->a		Ser/Thr protein kinase B PKNB (protein kinase B) (STPK B)	Rv0014c	branch_(28, 27)
s106	16119	missense	c->a	R->L	Ser/Thr protein kinase B PKNB (protein kinase B) (STPK B)	Rv0014c	branch_(13, 11)
s107	16526	silent	c->t		Ser/Thr protein kinase B PKNB (protein kinase B) (STPK B)	Rv0014c	branch_(77, 69)
s108	16720	missense	c->g	V->L	Ser/Thr protein kinase B PKNB (protein kinase B) (STPK B)	Rv0014c	branch_(58, 6)
s109	17335	silent	g->a		Ser/Thr protein kinase B PKNB (protein kinase B) (STPK B)	Rv0014c	branch_(40, 24)
s110	17344	missense	g->t	R->S	Ser/Thr protein kinase B PKNB (protein kinase B) (STPK B)	Rv0014c	branch_(57, 43)
s111	17608	missense	g->c	S->R	Ser/Thr protein kinase A PKNA (protein kinase A) (STPK A)	Rv0015c	branch_(26, 25)
s112	17654	missense	t->g	Q->P	Ser/Thr protein kinase A PKNA (protein kinase A) (STPK A)	Rv0015c	branch_(16, 15)
s113	17657	missense	t->c	Q->R	Ser/Thr protein kinase A PKNA (protein kinase A) (STPK A)	Rv0015c	branch_(16, 15)
s114	18091	silent	g->a		Ser/Thr protein kinase A PKNA (protein kinase A) (STPK A)	Rv0015c	branch_(22, 21)
s115	18664	silent	g->a		Ser/Thr protein kinase A PKNA (protein kinase A) (STPK A)	Rv0015c	branch_(47, 38)
s116	18831	silent	g->a		penicillin-binding protein PbpA	Rv0016c	branch_(80, 70)
s117	18869	missense	c->t	V->I	penicillin-binding protein PbpA	Rv0016c	branch_(48, 13)
s118	19077	silent	c->t		penicillin-binding protein PbpA	Rv0016c	branch_(82, 8)
s119	19282	missense	a->c	V->G	penicillin-binding protein PbpA	Rv0016c	branch_(47, 38)
s120	19286	missense	g->t	Q->K	penicillin-binding protein PbpA	Rv0016c	branch_(46, 44)
s121	19887	missense	g->c	F->L	penicillin-binding protein PbpA	Rv0016c	branch_(81, 58)
s122	20007	silent	c->t		penicillin-binding protein PbpA	Rv0016c	branch_(68, 12)
s123	20389	missense	g->a	P->S	cell division protein RodA	Rv0017c	branch_(35, 26)
s124	20544	missense	g->c	T->S	cell division protein RodA	Rv0017c	branch_(74, 70)
s125	21370	missense	g->a	L->F	cell division protein RodA	Rv0017c	branch_(50, 38)
s126	21502	missense	c->t	G->R	cell division protein RodA	Rv0017c	branch_(50, 38)
s127	22264	silent	t->g		serine/threonine phosphatase	Rv0018c	branch_(5, 3)
s128	22303	silent	c->g		serine/threonine phosphatase	Rv0018c	branch_(82, 8)
s129	22334	missense	c->t	R->H	serine/threonine phosphatase	Rv0018c	branch_(41, 22)
s130	22460	missense	t->c	Y->C	serine/threonine phosphatase	Rv0018c	branch_(76, 74)
s131	22936	silent	c->t		serine/threonine phosphatase	Rv0018c	branch_(67, 12)
s132	22961	missense	t->g	D->A	serine/threonine phosphatase	Rv0018c	branch_(69, 7)
s133	23174	missense	c->a	R->L	serine/threonine phosphatase	Rv0018c	branch_(9, 8)
s134	23306	missense	a->c	FV->CV	serine/threonine phosphatase	Rv0019c	branch_(44, 43)
s135	23714	silent	c->t		hypothetical protein	Rv0019c	branch_(5, 3)
s136	23854	intergenic	a->g			IG-Rv0019c-Rv0020c	branch_(49, 22)
s137	24007	silent	g->t		hypothetical protein	Rv0020c	branch_(62, 10)
s138	24125	silent	g->a		hypothetical protein	Rv0020c	branch_(30, 28)
s139	24294	missense	c->t	R->Q	hypothetical protein	Rv0020c	branch_(5, 3)
s140	24409	missense	g->a	P->S	hypothetical protein	Rv0020c	branch_(50, 38)
s141	24664	silent	g->t		hypothetical protein	Rv0020c	branch_(76, 74)
s142	24679	missense	a->g	Y->H	hypothetical protein	Rv0020c	branch_(4, 3)
s143	24780	missense	t->c	D->G	hypothetical protein	Rv0020c	branch_(6, 5)
s144	24936	missense	c->t	R->H	hypothetical protein	Rv0020c	branch_(57, 43)
s145	25074	missense	g->a	T->I	hypothetical protein	Rv0020c	branch_(57, 43)
s146	25139	silent	a->g		hypothetical protein	Rv0020c	branch_(80, 70)
s147	25223	missense	c->g	L->F	hypothetical protein	Rv0020c	branch_(82, 8)
s148	25306	missense	c->g	G->R	hypothetical protein	Rv0020c	branch_(4, 3)
s149	25386	missense	c->t	G->D	hypothetical protein	Rv0020c	branch_(58, 6)
s150	25610	intergenic	g->c			IG-Rv0020c-Rv0021c	branch_(13, 11)
s151	26053	missense	c->g	A->P	hypothetical protein	Rv0021c	branch_(6, 5)
s152	26177	silent	g->t		hypothetical protein	Rv0021c	branch_(75, 74)
s153	26300	silent	t->c		hypothetical protein	Rv0021c	branch_(40, 24)
s154	26347	missense	c->g	D->H	hypothetical protein	Rv0021c	branch_(69, 7)
s155	26783	silent	c->t		hypothetical protein	Rv0021c	branch_(58, 6)
s156	26957	intergenic	c->g			IG-Rv0021c-Rv0022c	branch_(62, 10)
s157	26959	intergenic	c->g			IG-Rv0021c-Rv0022c	branch_(52, 21)
s158	27027	missense	g->a	A->V	transcriptional regulatory protein WHIB-like WHIB5	Rv0022c	branch_(44, 43)
s159	27139	missense	g->c	Q->E	transcriptional regulatory protein WHIB-like WHIB5	Rv0022c	branch_(48, 13)
s160	28668	missense	g->t	V->F	secreted protein P60-related protein	Rv0024	branch_(39, 14)
s161	29999	missense	a->c	Q->P	hypothetical protein	Rv0026	branch_(5, 3)
s162	30496	missense	a->g	T->A	hypothetical protein	Rv0026	branch_(28, 27)
s163	30519	silent	c->t		hypothetical protein	Rv0026	branch_(51, 24)
s164	30688	missense	t->g	S->A	hypothetical protein	Rv0026	branch_(24, 23)
s165	30756	silent	g->a		hypothetical protein	Rv0026	branch_(5, 3)
s166	31057	missense	c->g	Q->R	hypothetical protein	Rv0026	branch_(7, 6)
s167	31077	intergenic	c->t			IG-Rv0026-Rv0027	branch_(23, 19)
s168	31142	intergenic	c->t			IG-Rv0026-Rv0027	branch_(77, 69)
s169	31431	missense	g->a	TR->TH	hypothetical protein	Rv0027	branch_(47, 38)
s170	31807	silent	c->t		hypothetical protein	Rv0028	branch_(59, 58)
s171	31977	intergenic	c->t			IG-Rv0028-Rv0029	branch_(68, 12)
s172	32075	intergenic	t->c			IG-Rv0029-Rv0030	branch_(41, 22)
s173	32103	intergenic	c->t			IG-Rv0029-Rv0030	branch_(65, 63)
s174	33121	silent	c->t		hypothetical protein	Rv0029	branch_(80, 70)
s175	33137	missense	c->g	L->V	hypothetical protein	Rv0029	branch_(37, 5)
s176	33267	missense	g->a	S->N	hypothetical protein	Rv0030	branch_(72, 71)
s177	33457	silent	c->t		hypothetical protein	Rv0030	branch_(25, 20)
s178	33551	missense	t->g	*S->GR	hypothetical protein	Rv0030	branch_(25, 20)
s179	33692	silent	g->a		remnant of A transposase	Rv0031	branch_(73, 71)
s180	33804	intergenic	g->a			IG-Rv0031-Rv0032	branch_(4, 3)
s181	33817	intergenic	c->g			IG-Rv0031-Rv0032	branch_(49, 22)
s182	33932	intergenic	t->c			IG-Rv0031-Rv0032	branch_(80, 70)
s183	33938	intergenic	g->a			IG-Rv0031-Rv0032	branch_(57, 43)
s184	34044	intergenic	t->c			IG-Rv0031-Rv0032	branch_(52, 21)
s185	34063	intergenic	c->t			IG-Rv0031-Rv0032	branch_(60, 59)
s186	34226	missense	a->g	T->A	8-amino-7-oxononanoate synthase BioF2	Rv0031	branch_(41, 22)
s187	34527	missense	g->c	C->S	8-amino-7-oxononanoate synthase BioF2	Rv0032	branch_(33, 27)
s188	34643	missense	g->a	D->N	8-amino-7-oxononanoate synthase BioF2	Rv0032	branch_(81, 58)
s189	34690	missense	c->g	Y->*	8-amino-7-oxononanoate synthase BioF2	Rv0032	branch_(81, 58)
s190	35097	missense	t->c	I->T	8-amino-7-oxononanoate synthase BioF2	Rv0032	branch_(35, 26)
s191	35342	silent	c->t		8-amino-7-oxononanoate synthase BioF2	Rv0032	branch_(3, 0)
s192	35608	silent	c->t		8-amino-7-oxononanoate synthase BioF2	Rv0032	branch_(14, 13)
s193	35669	missense	a->g	T->A	8-amino-7-oxononanoate synthase BioF2	Rv0032	branch_(49, 22)
s194	36008	missense	g->c	D->H	8-amino-7-oxononanoate synthase BioF2	Rv0032	branch_(11, 10)
s195	36112	missense	g->a	M->I	8-amino-7-oxononanoate synthase BioF2	Rv0032	branch_(45, 44)
s196	36400	silent	g->c		8-amino-7-oxononanoate synthase BioF2	Rv0032	branch_(61, 59)
s197	36538	silent	t->c		8-amino-7-oxononanoate synthase BioF2	Rv0032	branch_(9, 8)
s198	36612	silent	a->g		acyl carrier protein	Rv0033	branch_(5, 3)
s199	36837	missense	c->a	AQ->AK	acyl carrier protein	Rv0033	branch_(45, 44)
s200	36848	missense	c->t	P->LP	acyl carrier protein	Rv0033	branch_(46, 44)
s201	36919	missense	c->t	A->V	hypothetical protein	Rv0034	branch_(81, 58)
s202	37031	silent	c->g		hypothetical protein	Rv0034	branch_(52, 21)
s203	37040	silent	c->t		hypothetical protein	Rv0034	branch_(67, 12)
s204	37241	silent	g->a		hypothetical protein	Rv0034	branch_(57, 43)
s205	37305	missense	c->g	S->W	fatty-acid-CoA ligase	Rv0035	branch_(11, 10)
s206	37334	missense	a->t	T->S	fatty-acid-CoA ligase	Rv0035	branch_(16, 15)
s207	37645	silent	c->t		fatty-acid-CoA ligase	Rv0035	branch_(41, 22)
s208	37763	missense	g->c	D->H	fatty-acid-CoA ligase	Rv0035	branch_(27, 26)
s209	37994	missense	c->t	R->W	fatty-acid-CoA ligase	Rv0035	branch_(50, 38)
s210	38032	silent	c->t		fatty-acid-CoA ligase	Rv0035	branch_(81, 58)
s211	38213	missense	g->t	G->C	fatty-acid-CoA ligase	Rv0035	branch_(35, 26)
s212	38332	missense	g->t	E->D	fatty-acid-CoA ligase	Rv0035	branch_(71, 70)
s213	38612	missense	g->a	G->R	fatty-acid-CoA ligase	Rv0035	branch_(67, 12)
s214	39085	missense	a->g	F->L	hypothetical protein	Rv0036c	branch_(48, 13)
s215	39093	missense	g->a	A->V	Protein encoding sequence predicted by BioNumerics	Rv0036c	branch_(3, 0)
s216	39158	silent	c->g		hypothetical protein	Rv0036c	branch_(11, 10)
s217	39200	silent	g->c		hypothetical protein	Rv0036c	branch_(47, 38)
s218	39699	missense	t->g	Q->P	hypothetical protein	Rv0036c	branch_(82, 8)
s219	39739	missense	c->g	A->P	hypothetical protein	Rv0036c	branch_(80, 70)
s220	39758	silent	a->g		hypothetical protein	Rv0036c	branch_(9, 8)
s221	39786	missense	c->g	S->T	hypothetical protein	Rv0036c	branch_(58, 6)
s222	40162	missense	c->t	GM->SI	hypothetical protein	Rv0037c	branch_(35, 26)
s223	40177	missense	c->t	AL->TL	hypothetical protein	Rv0037c	branch_(59, 58)
s224	40478	missense	c->a	LW->FL	hypothetical protein	Rv0037c	branch_(51, 24)
s225	40673	missense	c->t	G->GD	hypothetical protein	Rv0037c	branch_(55, 52)
s226	40728	missense	c->t	GV->DM	hypothetical protein	Rv0037c	branch_(67, 12)
s227	41151	missense	c->a	RA->LS	hypothetical protein	Rv0037c	branch_(77, 69)
s228	41155	missense	t->c	TA->A	Protein encoding sequence predicted by BioNumerics	Rv0037c	branch_(40, 24)
s229	41241	missense	g->a	TL->IL	hypothetical protein	Rv0037c	branch_(43, 37)
s230	41244	missense	c->a	CV->FL	Protein encoding sequence predicted by BioNumerics	Rv0037c	branch_(4, 3)
s231	41257	missense	a->g	SG->PG	hypothetical protein	Rv0037c	branch_(36, 25)
s232	41453	silent	c->t		hypothetical protein	Rv0038	branch_(4, 3)
s233	42401	intergenic	g->a			IG-Rv0039c-Rv0040c	branch_(82, 8)
s234	42417	intergenic	t->c			IG-Rv0039c-Rv0040c	branch_(55, 52)
s235	42624	missense	t->c	T->A	hypothetical protein	Rv0040c	branch_(50, 38)
s236	42747	missense	c->t	D->N	hypothetical protein	Rv0040c	branch_(41, 22)
s237	42756	missense	c->t	A->T	hypothetical protein	Rv0040c	branch_(35, 26)
s238	42811	silent	g->a		hypothetical protein	Rv0040c	branch_(67, 12)
s239	42967	silent	g->c		hypothetical protein	Rv0040c	branch_(52, 21)
s240	43041	missense	g->a	H->Y	hypothetical protein	Rv0040c	branch_(40, 24)
s241	43337	missense	a->c	V->G	hypothetical protein	Rv0040c	branch_(40, 24)
s242	43752	missense	c->t	A->V	leucyl-tRNA synthetase	Rv0041	branch_(57, 43)
s243	43945	silent	a->g		leucyl-tRNA synthetase	Rv0041	branch_(8, 7)
s244	44268	missense	c->t	A->V	leucyl-tRNA synthetase	Rv0041	branch_(76, 74)
s245	44452	silent	t->c		leucyl-tRNA synthetase	Rv0041	branch_(61, 59)
s246	44768	missense	a->g	R->G	leucyl-tRNA synthetase	Rv0041	branch_(13, 11)
s247	44924	missense	c->t	R->W	leucyl-tRNA synthetase	Rv0041	branch_(47, 38)
s248	44996	missense	g->a	G->S	leucyl-tRNA synthetase	Rv0041	branch_(80, 70)
s249	45193	silent	g->a		leucyl-tRNA synthetase	Rv0041	branch_(5, 3)
s250	45206	missense	g->a	A->T	leucyl-tRNA synthetase	Rv0041	branch_(66, 63)
s251	45649	silent	t->c		leucyl-tRNA synthetase	Rv0041	branch_(46, 44)
s252	45988	silent	c->t		leucyl-tRNA synthetase	Rv0041	branch_(39, 14)
s253	46231	silent	c->t		leucyl-tRNA synthetase	Rv0041	branch_(40, 24)
s254	46297	silent	t->c		leucyl-tRNA synthetase	Rv0041	branch_(58, 6)
s255	46735	missense	g->a	A->V	MarR family transcriptional regulator	Rv0042c	branch_(77, 69)
s256	46815	silent	g->c		MarR family transcriptional regulator	Rv0042c	branch_(28, 27)
s257	46994	missense	g->a	R->C	MarR family transcriptional regulator	Rv0042c	branch_(68, 12)
s258	47371	missense	g->c	P->A	GntR family transcriptional regulator	Rv0043c	branch_(82, 8)
s259	47699	silent	g->a		GntR family transcriptional regulator	Rv0043c	branch_(36, 25)
s260	47877	missense	t->g	D->A	GntR family transcriptional regulator	Rv0043c	branch_(59, 58)
s261	47978	silent	c->t		GntR family transcriptional regulator	Rv0043c	branch_(57, 43)
s262	48410	silent	g->a		oxidoreductase	Rv0044c	branch_(82, 8)
s263	48493	missense	c->t	E->K	oxidoreductase	Rv0044c	branch_(57, 43)
s264	48503	silent	t->c		oxidoreductase	Rv0044c	branch_(16, 15)
s265	49079	silent	c->g		hydrolase	Rv0045c	branch_(49, 22)
s266	49080	missense	a->g	L->P	hydrolase	Rv0045c	branch_(33, 27)
s267	49139	silent	a->c		hydrolase	Rv0045c	branch_(82, 8)
s268	49360	missense	c->t	V->I	hydrolase	Rv0045c	branch_(10, 9)
s269	49405	missense	g->t	Q->K	hydrolase	Rv0045c	branch_(82, 8)
s270	49608	missense	a->c	L->R	hydrolase	Rv0045c	branch_(82, 8)
s271	49764	missense	c->t	G->E	hydrolase	Rv0045c	branch_(73, 71)
s272	49787	silent	c->t		hydrolase	Rv0045c	branch_(61, 59)
s273	49959	missense	t->g	N->T	hydrolase	Rv0045c	branch_(67, 12)
s274	49976	silent	c->t		hydrolase	Rv0045c	branch_(77, 69)
s275	50005	intergenic	g->a			IG-Rv0045c-Rv0046c	branch_(4, 3)
s276	50059	missense	t->a	I->F	myo-inositol-1-phosphate synthase INO1 (inositol 1-phosphate synthetase) (D-glucose 6-phosphate cycl	Rv0046c	branch_(58, 6)
s277	50557	missense	t->c	R->G	myo-inositol-1-phosphate synthase INO1 (inositol 1-phosphate synthetase) (D-glucose 6-phosphate cycl	Rv0046c	branch_(20, 19)	branch_(77, 69)
s278	50766	missense	a->g	I->T	myo-inositol-1-phosphate synthase INO1 (inositol 1-phosphate synthetase) (D-glucose 6-phosphate cycl	Rv0046c	branch_(3, 0)
s279	51113	silent	g->a		myo-inositol-1-phosphate synthase INO1 (inositol 1-phosphate synthetase) (D-glucose 6-phosphate cycl	Rv0046c	branch_(37, 5)
s280	51649	missense	g->c	L->V	hypothetical protein	Rv0047c	branch_(51, 24)
s281	51892	missense	t->c	Y->C	hypothetical protein	Rv0048c	branch_(59, 58)
s282	51949	missense	a->g	V->A	hypothetical protein	Rv0048c	branch_(20, 19)
s283	51954	missense	t->a	E->D	hypothetical protein	Rv0048c	branch_(23, 19)
s284	52028	missense	c->t	G->S	hypothetical protein	Rv0048c	branch_(5, 3)
s285	52742	missense	g->a	R->W	hypothetical protein	Rv0048c	branch_(47, 38)
s286	53591	missense	a->g	R->G	bifunctional penicillin-binding protein 1A/1B	Rv0049	branch_(68, 12)
s287	53666	missense	g->a	V->M	bifunctional penicillin-binding protein 1A/1B	Rv0050	branch_(75, 74)
s288	53679	missense	c->t	P->L	bifunctional penicillin-binding protein 1A/1B	Rv0050	branch_(5, 3)
s289	53785	missense	c->g	I->M	bifunctional penicillin-binding protein 1A/1B	Rv0050	branch_(51, 24)
s290	54304	silent	c->t		bifunctional penicillin-binding protein 1A/1B	Rv0050	branch_(22, 21)
s291	54394	silent	a->g		bifunctional penicillin-binding protein 1A/1B	Rv0050	branch_(20, 19)
s292	54716	silent	c->t		bifunctional penicillin-binding protein 1A/1B	Rv0050	branch_(74, 70)
s293	54842	missense	g->t	A->S	bifunctional penicillin-binding protein 1A/1B	Rv0050	branch_(62, 10)
s294	55069	missense	g->c	L->F	bifunctional penicillin-binding protein 1A/1B	Rv0050	branch_(71, 70)
s295	55418	missense	a->g	I->V	bifunctional penicillin-binding protein 1A/1B	Rv0050	branch_(74, 70)
s296	56001	silent	g->a		transmembrane protein	Rv0051	branch_(62, 10)
s297	56204	missense	c->t	A->V	transmembrane protein	Rv0051	branch_(73, 71)
s298	56660	missense	g->c	G->A	transmembrane protein	Rv0051	branch_(39, 14)
s299	56738	missense	c->t	T->I	transmembrane protein	Rv0051	branch_(68, 12)
s300	57298	missense	c->g	RP->GP	transmembrane protein	Rv0051	branch_(17, 16)
s301	57393	missense	a->t	Y->F	hypothetical protein	Rv0051	branch_(23, 19)
s302	57731	missense	c->t	R->*	hypothetical protein	Rv0052	branch_(82, 8)
s303	58142	intergenic	c->t			IG-Rv0052-Rv0053	branch_(82, 8)
s304	58517	intergenic	g->t			IG-Rv0053-Rv0054	branch_(35, 26)
s305	58875	missense	c->t	T->I	single-stranded DNA-binding protein	Rv0054	branch_(59, 58)
s306	59257	missense	g->a	R->Q	50S ribosomal protein L9	Rv0055	branch_(38, 37)
s307	59790	missense	g->t	G->C	50S ribosomal protein L9	Rv0056	branch_(61, 59)
s308	59871	intergenic	g->a			IG-Rv0056-Rv0057	branch_(4, 3)
s309	59872	intergenic	a->g			IG-Rv0056-Rv0057	branch_(81, 58)
s310	59889	intergenic	t->g			IG-Rv0056-Rv0057	branch_(67, 12)
s311	59977	missense	c->a	L->M	hypothetical protein	Rv0057	branch_(29, 28)
s312	60059	missense	c->t	T->M	hypothetical protein	Rv0057	branch_(59, 58)
s313	60300	silent	g->a		hypothetical protein	Rv0057	branch_(59, 58)
s314	60430	missense	a->g	D->G	replicative DNA helicase	Rv0058	branch_(82, 8)
s315	60456	missense	g->c	G->R	replicative DNA helicase	Rv0058	branch_(49, 22)
s316	61998	missense	g->a	V->M	replicative DNA helicase	Rv0058	branch_(48, 13)
s317	62049	missense	a->g	R->G	replicative DNA helicase	Rv0058	branch_(52, 21)
s318	62180	silent	c->t		replicative DNA helicase	Rv0058	branch_(80, 70)
s319	62367	missense	g->a	V->I	replicative DNA helicase	Rv0058	branch_(37, 5)
s320	62499	missense	g->c	A->P	replicative DNA helicase	Rv0058	branch_(50, 38)
s321	62642	missense	g->a	M->I	replicative DNA helicase	Rv0058	branch_(38, 37)
s322	62657	silent	g->a		replicative DNA helicase	Rv0058	branch_(23, 19)
s323	62768	silent	a->g		replicative DNA helicase	Rv0058	branch_(5, 3)
s324	63039	intergenic	c->t			IG-Rv0058-Rv0059	branch_(5, 3)
s325	63059	intergenic	c->g			IG-Rv0058-Rv0059	branch_(5, 3)
s326	63126	intergenic	c->g			IG-Rv0058-Rv0059	branch_(81, 58)
s327	63135	intergenic	t->a			IG-Rv0058-Rv0059	branch_(81, 58)
s328	63136	intergenic	c->g			IG-Rv0058-Rv0059	branch_(81, 58)
s329	63146	intergenic	g->t			IG-Rv0058-Rv0059	branch_(11, 10)
s330	63752	silent	c->t		hypothetical protein	Rv0059	branch_(78, 77)
s331	63771	missense	c->t	P->L	hypothetical protein	Rv0059	branch_(25, 20)
s332	64028	silent	c->t		hypothetical protein	Rv0060	branch_(69, 7)
s333	64211	silent	c->t		hypothetical protein	Rv0060	branch_(79, 77)
s334	64765	missense	c->t	T->M	hypothetical protein	Rv0060	branch_(65, 63)
s335	65083	silent	g->a		hypothetical protein	Rv0061	branch_(62, 10)
s336	65150	missense	c->t	P->S	hypothetical protein	Rv0061	branch_(13, 11)
s337	65159	missense	g->a	A->T	hypothetical protein	Rv0061	branch_(69, 7)
s338	65246	silent	c->t		hypothetical protein	Rv0061	branch_(48, 13)
s339	65367	missense	c->a	T->K	hypothetical protein	Rv0061	branch_(80, 70)
s340	65390	missense	c->t	Q->*	hypothetical protein	Rv0061	branch_(49, 22)
s341	65432	intergenic	c->a			IG-Rv0061-Rv0062	branch_(60, 59)
s342	65605	silent	t->g		endo-1,4-beta-glucanase	Rv0062	branch_(80, 70)
s343	65621	missense	c->a	P->T	endo-1,4-beta-glucanase	Rv0062	branch_(61, 59)
s344	65663	missense	c->g	H->D	endo-1,4-beta-glucanase	Rv0062	branch_(69, 7)
s345	65703	missense	t->c	V->A	endo-1,4-beta-glucanase	Rv0062	branch_(79, 77)
s346	65766	missense	a->c	D->A	endo-1,4-beta-glucanase	Rv0062	branch_(3, 0)
s347	65811	missense	c->t	A->V	endo-1,4-beta-glucanase	Rv0062	branch_(44, 43)
s348	65867	missense	g->a	V->I	endo-1,4-beta-glucanase	Rv0062	branch_(4, 3)
s349	66285	missense	c->g	A->G	endo-1,4-beta-glucanase	Rv0062	branch_(24, 23)
s350	66313	silent	g->a		endo-1,4-beta-glucanase	Rv0062	branch_(80, 70)
s351	66632	missense	c->t	P->S	endo-1,4-beta-glucanase	Rv0062	branch_(62, 10)
s352	66827	intergenic	c->t			IG-Rv0062-Rv0063	branch_(82, 8)
s353	66892	intergenic	c->g			IG-Rv0062-Rv0063	branch_(69, 7)
s354	67012	silent	c->t		oxidoreductase	Rv0063	branch_(62, 10)
s355	67038	missense	a->t	E->V	oxidoreductase	Rv0063	branch_(64, 62)
s356	67064	missense	a->g	K->E	oxidoreductase	Rv0063	branch_(68, 12)
s357	67637	missense	a->g	T->A	oxidoreductase	Rv0063	branch_(47, 38)
s358	68174	missense	t->c	S->P	oxidoreductase	Rv0063	branch_(69, 7)
s359	69025	missense	g->c	V->L	hypothetical protein	Rv0064	branch_(36, 25)
s360	69072	silent	c->t		hypothetical protein	Rv0064	branch_(3, 0)
s361	69342	silent	g->a		hypothetical protein	Rv0064	branch_(49, 22)
s362	69603	missense	c->a	N->K	hypothetical protein	Rv0064	branch_(82, 8)
s363	70816	missense	a->g	N->D	hypothetical protein	Rv0064	branch_(52, 21)
s364	70924	missense	c->t	L->F	hypothetical protein	Rv0064	branch_(42, 23)
s365	71203	missense	c->t, c->g	Q->*	hypothetical protein	Rv0064	branch_(59, 58)	branch_(72, 71)
s366	71731	silent	c->t		hypothetical protein	Rv0064	branch_(5, 3)
s367	71914	missense	t->c	S->GP	Protein encoding sequence predicted by BioNumerics	Rv0065	branch_(48, 13)
s368	72446	missense	g->a	S->L	isocitrate dehydrogenase	Rv0066c	branch_(64, 62)
s369	72545	missense	t->g	E->A	isocitrate dehydrogenase	Rv0066c	branch_(82, 8)
s370	72549	missense	c->t	G->S	isocitrate dehydrogenase	Rv0066c	branch_(62, 10)
s371	73148	missense	g->a	A->V	isocitrate dehydrogenase	Rv0066c	branch_(58, 6)
s372	73173	missense	c->t	V->M	isocitrate dehydrogenase	Rv0066c	branch_(44, 43)
s373	73456	silent	g->a		isocitrate dehydrogenase	Rv0066c	branch_(82, 8)
s374	73756	silent	g->a		isocitrate dehydrogenase	Rv0066c	branch_(74, 70)
s375	74059	silent	c->t		isocitrate dehydrogenase	Rv0066c	branch_(25, 20)
s376	74092	silent	c->t		isocitrate dehydrogenase	Rv0066c	branch_(5, 3)
s377	74161	missense	c->g	K->N	isocitrate dehydrogenase	Rv0066c	branch_(6, 5)
s378	74318	missense	g->t	P->Q	isocitrate dehydrogenase	Rv0066c	branch_(76, 74)
s379	74737	missense	t->g	E->D	TetR family transcriptional regulator	Rv0067c	branch_(69, 7)
s380	75203	intergenic	t->c			IG-Rv0067c-Rv0068	branch_(34, 15)
s381	75233	intergenic	c->a			IG-Rv0067c-Rv0068	branch_(10, 9)	branch_(77, 69)
s382	75247	intergenic	t->c			IG-Rv0067c-Rv0068	branch_(68, 12)
s383	75264	intergenic	c->t			IG-Rv0067c-Rv0068	branch_(24, 23)
s384	75304	missense	a->g	T->A	short-chain dehydrogenase	Rv0068	branch_(40, 24)
s385	75313	missense	a->c	T->P	short-chain dehydrogenase	Rv0068	branch_(58, 6)
s386	75809	missense	a->g	Y->C	short-chain dehydrogenase	Rv0068	branch_(46, 44)
s387	75940	missense	g->c	V->L	short-chain dehydrogenase	Rv0068	branch_(52, 21)
s388	76147	missense	c->g	Q->E	short-chain dehydrogenase	Rv0068	branch_(43, 37)
s389	76164	silent	g->a		short-chain dehydrogenase	Rv0068	branch_(68, 12)
s390	76165	missense	t->c	W->R	short-chain dehydrogenase	Rv0068	branch_(68, 12)
s391	84825	missense	t->g	I->S	aminotransferase	Rv0075	branch_(68, 12)
s392	84972	missense	a->g	D->G	aminotransferase	Rv0075	branch_(3, 0)
s393	85151	missense	c->a	R->S	aminotransferase	Rv0075	branch_(81, 58)
s394	85247	missense	a->g	L->P	hypothetical protein	Rv0076c	branch_(45, 44)
s395	85985	missense	t->c	N->S	oxidoreductase	Rv0077c	branch_(65, 63)
s396	86275	silent	c->a		oxidoreductase	Rv0077c	branch_(50, 38)
s397	86481	missense	c->t	ES->KL	oxidoreductase	Rv0077c	branch_(81, 58)
s398	86587	silent	c->a		transcriptional regulatory protein	Rv0078	branch_(58, 6)
s399	86864	missense	a->g	I->V	transcriptional regulatory protein	Rv0078	branch_(5, 3)
s400	87079	silent	t->c		transcriptional regulatory protein	Rv0078	branch_(3, 0)
s401	87257	missense	c->a	R->L	hypothetical protein	Rv0078A	branch_(41, 22)
s402	87468	missense	c->t	E->K	hypothetical protein	Rv0078A	branch_(11, 10)
s403	87499	silent	g->a		hypothetical protein	Rv0078A	branch_(59, 58)
s404	87811	intergenic	g->a			IG-Rv0078A-Rv0079	branch_(73, 71)
s405	87973	intergenic	c->t			IG-Rv0078A-Rv0079	branch_(58, 6)
s406	88072	intergenic	g->a			IG-Rv0078A-Rv0079	branch_(81, 58)
s407	88176	silent	a->g		hypothetical protein	Rv0078A	branch_(65, 63)
s408	88486	missense	g->c	D->H	hypothetical protein	Rv0079	branch_(28, 27)
s409	88773	missense	c->g	H->Q	hypothetical protein	Rv0079	branch_(66, 63)
s410	89105	silent	g->a		hypothetical protein	Rv0080	branch_(61, 59)
s411	89113	missense	t->g	V->G	hypothetical protein	Rv0080	branch_(43, 37)
s412	89135	missense	c->g	F->L	hypothetical protein	Rv0080	branch_(76, 74)
s413	89200	missense	g->t	G->V	hypothetical protein	Rv0080	branch_(8, 7)
s414	89254	missense	c->a	A->D	hypothetical protein	Rv0080	branch_(47, 38)
s415	89474	missense	g->a	TR->TH	hypothetical protein	Rv0080	branch_(58, 6)
s416	89535	silent	c->t		transcriptional regulatory protein	Rv0080	branch_(6, 5)
s417	89767	missense	g->t	A->S	transcriptional regulatory protein	Rv0081	branch_(49, 22)
s418	89871	silent	c->t		transcriptional regulatory protein	Rv0081	branch_(69, 7)
s419	90111	missense	a->g	E->G	oxidoreductase	Rv0082	branch_(68, 12)
s420	90144	missense	a->g	Q->R	oxidoreductase	Rv0082	branch_(56, 53)
s421	90502	missense	c->t	H->Y	oxidoreductase	Rv0083	branch_(35, 26)
s422	90613	missense	a->g	I->V	oxidoreductase	Rv0083	branch_(82, 8)
s423	90649	missense	c->t	P->S	oxidoreductase	Rv0083	branch_(61, 59)
s424	91649	missense	c->t	A->V	oxidoreductase	Rv0083	branch_(68, 12)
s425	92322	missense	a->t	*N->CY	oxidoreductase	Rv0083	branch_(5, 3)
s426	93044	silent	g->a		formate hydrogenlyase HYCD	Rv0084	branch_(49, 22)
s427	94303	missense	t->c	MD->TD	hydrogenase HycQ	Rv0086	branch_(5, 3)
s428	94344	missense	g->a	VG->ID	hydrogenase HycQ	Rv0086	branch_(42, 23)
s429	94388	missense	g->a	GA->GT	hydrogenase HycQ	Rv0086	branch_(13, 11)
s430	94827	missense	g->c	VG->LA	hydrogenase HycQ	Rv0086	branch_(40, 24)	branch_(81, 58)
s431	95392	missense	c->a	AR->DR	hydrogenase HycQ	Rv0086	branch_(80, 70)
s432	95591	missense	g->t	E->*	formate hydrogenase HycE	Rv0087	branch_(24, 23)
s433	95861	missense	g->a	V->M	formate hydrogenase HycE	Rv0087	branch_(35, 26)
s434	95867	missense	g->t	A->S	formate hydrogenase HycE	Rv0087	branch_(58, 6)
s435	96101	missense	g->a	V->I	formate hydrogenase HycE	Rv0087	branch_(5, 3)
s436	96792	missense	a->c	NT->TP	formate hydrogenase HycE	Rv0087	branch_(47, 38)
s437	96894	missense	c->t	R->C	hypothetical protein	Rv0087	branch_(15, 14)
s438	97020	silent	c->a		hypothetical protein	Rv0088	branch_(73, 71)
s439	97350	silent	a->c		hypothetical protein	Rv0088	branch_(15, 14)
s440	97388	missense	g->t	W->C	hypothetical protein	Rv0088	branch_(51, 24)
s441	97622	intergenic	g->a			IG-Rv0088-Rv0089	branch_(48, 13)
s442	97696	intergenic	t->c			IG-Rv0088-Rv0089	branch_(8, 7)
s443	97856	silent	c->t		methyltransferase/methylase	Rv0089	branch_(46, 44)
s444	97898	silent	c->t		methyltransferase/methylase	Rv0089	branch_(38, 37)
s445	97952	silent	c->t		methyltransferase/methylase	Rv0089	branch_(74, 70)
s446	98068	missense	c->t	A->V	methyltransferase/methylase	Rv0089	branch_(42, 23)
s447	98392	intergenic	g->a			IG-Rv0089-Rv0090	branch_(82, 8)
s448	98485	intergenic	c->t			IG-Rv0090-Rv0091	branch_(81, 58)
s449	98532	missense	g->t	G->V	hypothetical protein	Rv0090	branch_(46, 44)
s450	98966	missense	g->c	A->P	hypothetical protein	Rv0090	branch_(69, 7)
s451	99301	intergenic	c->t			IG-Rv0090-Rv0091	branch_(5, 3)
s452	100122	missense	a->g	T->A	bifunctional 5''''-methylthioadenosine nucleosidase/S-adenosylhomocysteine nucleosidase	Rv0091	branch_(82, 8)
s453	100589	missense	a->g	T->A	cation transporter P-type ATPase A	Rv0092	branch_(6, 5)
s454	100895	missense	g->t	A->S	cation transporter P-type ATPase A	Rv0092	branch_(49, 22)
s455	101179	silent	g->a		cation transporter P-type ATPase A	Rv0092	branch_(72, 71)
s456	101351	missense	g->a	V->I	cation transporter P-type ATPase A	Rv0092	branch_(40, 24)
s457	101706	missense	c->t	A->V	cation transporter P-type ATPase A	Rv0092	branch_(82, 8)
s458	101727	missense	g->a	G->E	cation transporter P-type ATPase A	Rv0092	branch_(35, 26)
s459	101819	missense	g->a	V->M	cation transporter P-type ATPase A	Rv0092	branch_(80, 70)
s460	102650	missense	a->c	T->P	cation transporter P-type ATPase A	Rv0092	branch_(71, 70)
s461	103570	silent	c->a		hypothetical protein	Rv0093c	branch_(50, 38)
s462	103600	missense	a->g	C->R	hypothetical protein	Rv0093c	branch_(8, 7)
s463	103635	intergenic	c->a			IG-Rv0093c-Rv0094c	branch_(39, 14)
s464	104264	missense	t->c	K->E	hypothetical protein	Rv0094c	branch_(5, 3)
s465	105139	missense	c->a	G->V	hypothetical protein	Rv0095c	branch_(13, 11)
s466	105162	missense	g->c	H->Q	hypothetical protein	Rv0095c	branch_(79, 77)
s467	105670	missense	t->g	V->G	PPE family protein	Rv0096	branch_(68, 12)
s468	105736	missense	t->c	V->A	PPE family protein	Rv0096	branch_(10, 9)
s469	105850	missense	g->a	G->D	PPE family protein	Rv0096	branch_(67, 12)
s470	105867	missense	c->t	R->W	PPE family protein	Rv0096	branch_(5, 3)
s471	106126	missense	t->c	L->P	PPE family protein	Rv0096	branch_(77, 69)
s472	106334	silent	c->a		PPE family protein	Rv0096	branch_(6, 5)
s473	106655	silent	c->t		PPE family protein	Rv0096	branch_(73, 71)
s474	107299	missense	g->a	R->Q	oxidoreductase	Rv0097	branch_(73, 71)
s475	107485	missense	t->c	I->T	oxidoreductase	Rv0097	branch_(42, 23)
s476	107794	silent	c->t		hypothetical protein	Rv0098	branch_(42, 23)
s477	108184	missense	c->t	P->L	acyl-CoA synthetase	Rv0099	branch_(74, 70)
s478	108644	silent	c->t		acyl-CoA synthetase	Rv0099	branch_(66, 63)
s479	110278	missense	g->a	W->*	Protein encoding sequence predicted by BioNumerics	Rv0101	branch_(55, 52)
s480	110624	silent	c->a		peptide synthetase	Rv0101	branch_(50, 38)
s481	110865	missense	t->g	F->V	peptide synthetase	Rv0101	branch_(73, 71)
s482	111003	missense	g->a	A->T	peptide synthetase	Rv0101	branch_(18, 16)
s483	111135	missense	c->t	R->C	peptide synthetase	Rv0101	branch_(82, 8)
s484	111360	missense	t->c	S->P	peptide synthetase	Rv0101	branch_(28, 27)
s485	111651	missense	g->a	D->N	peptide synthetase	Rv0101	branch_(43, 37)
s486	112336	missense	g->a	G->D	peptide synthetase	Rv0101	branch_(82, 8)
s487	112547	silent	a->c		peptide synthetase	Rv0101	branch_(34, 15)
s488	112737	missense	g->a	D->N	peptide synthetase	Rv0101	branch_(40, 24)
s489	113059	missense	c->a	P->H	peptide synthetase	Rv0101	branch_(59, 58)
s490	113838	missense	c->t	L->F	peptide synthetase	Rv0101	branch_(36, 25)
s491	114093	missense	c->a	L->M	peptide synthetase	Rv0101	branch_(3, 0)
s492	114801	missense	t->c	S->P	peptide synthetase	Rv0101	branch_(44, 43)
s493	114876	missense	c->t	P->S	peptide synthetase	Rv0101	branch_(72, 71)
s494	115499	silent	t->g		peptide synthetase	Rv0101	branch_(69, 7)
s495	116000	silent	t->g		peptide synthetase	Rv0101	branch_(56, 53)
s496	116901	missense	t->g	C->G	peptide synthetase	Rv0101	branch_(43, 37)
s497	117295	missense	g->a	S->N	peptide synthetase	Rv0101	branch_(70, 69)
s498	117299	silent	g->a		peptide synthetase	Rv0101	branch_(80, 70)
s499	117389	silent	c->t		peptide synthetase	Rv0101	branch_(62, 10)
s500	117726	missense	g->a	G->R	integral membrane protein	Rv0102	branch_(68, 12)
s501	118002	missense	g->a	G->S	integral membrane protein	Rv0102	branch_(57, 43)
s502	118467	missense	g->c	A->P	integral membrane protein	Rv0102	branch_(48, 13)
s503	118469	silent	g->a		integral membrane protein	Rv0102	branch_(49, 22)
s504	119088	missense	c->t	P->S	integral membrane protein	Rv0102	branch_(68, 12)
s505	119753	intergenic	c->t			IG-Rv0102-Rv0103c	branch_(68, 12)
s506	119969	silent	c->a		cation-transporter P-type ATPase B	Rv0103c	branch_(68, 12)
s507	120483	missense	t->c	D->G	cation-transporter P-type ATPase B	Rv0103c	branch_(67, 12)
s508	120522	missense	c->t	G->D	cation-transporter P-type ATPase B	Rv0103c	branch_(72, 71)
s509	121248	missense	g->a	P->L	cation-transporter P-type ATPase B	Rv0103c	branch_(37, 5)
s510	122107	missense	c->t	GP->S	cation-transporter P-type ATPase B	Rv0103c	branch_(30, 28)
s511	122109	missense	a->g	LP->SP	cation-transporter P-type ATPase B	Rv0103c	branch_(52, 21)
s512	122614	missense	c->t	R->W	hypothetical protein	Rv0104	branch_(5, 3)
s513	122794	missense	t->g	F->V	hypothetical protein	Rv0104	branch_(22, 21)
s514	122884	missense	c->t	R->C	hypothetical protein	Rv0104	branch_(73, 71)
s515	123065	missense	g->a	G->D	hypothetical protein	Rv0104	branch_(82, 8)
s516	123188	missense	c->g	T->R	hypothetical protein	Rv0104	branch_(39, 14)
s517	123198	silent	t->c		hypothetical protein	Rv0104	branch_(62, 10)
s518	123454	missense	c->t	Q->*	hypothetical protein	Rv0104	branch_(13, 11)
s519	123475	missense	t->g	L->V	hypothetical protein	Rv0104	branch_(49, 22)
s520	123520	missense	t->c	Y->H	hypothetical protein	Rv0104	branch_(19, 9)
s521	123602	missense	a->c	K->T	hypothetical protein	Rv0104	branch_(73, 71)
s522	123701	missense	t->g	V->G	Protein encoding sequence predicted by BioNumerics	Rv0104	branch_(48, 13)
s523	123842	intergenic	c->t			IG-Rv0104-Rv0105c	branch_(6, 5)
s524	124136	missense	c->a	E->D	50S ribosomal protein L28	Rv0105c	branch_(66, 63)
s525	124412	missense	c->g	H->Q	hypothetical protein	Rv0106	branch_(80, 70)
s526	124835	silent	c->t		hypothetical protein	Rv0106	branch_(48, 13)
s527	125303	silent	g->a		hypothetical protein	Rv0106	branch_(44, 43)
s528	125711	silent	g->a		cation-transporter ATPase I	Rv0107c	branch_(50, 38)
s529	126042	silent	g->c		cation-transporter ATPase I	Rv0107c	branch_(3, 0)
s530	126249	silent	c->a		cation-transporter ATPase I	Rv0107c	branch_(49, 22)
s531	126324	silent	a->g		cation-transporter ATPase I	Rv0107c	branch_(67, 12)
s532	126563	missense	c->a	A->S	cation-transporter ATPase I	Rv0107c	branch_(5, 3)
s533	126803	missense	a->g	S->P	cation-transporter ATPase I	Rv0107c	branch_(9, 8)
s534	126853	missense	g->a	A->V	cation-transporter ATPase I	Rv0107c	branch_(77, 69)
s535	126883	missense	t->g	E->A	cation-transporter ATPase I	Rv0107c	branch_(49, 22)
s536	127082	missense	c->t	G->S	cation-transporter ATPase I	Rv0107c	branch_(74, 70)
s537	127410	silent	c->g		cation-transporter ATPase I	Rv0107c	branch_(4, 3)
s538	127850	missense	c->a	G->C	cation-transporter ATPase I	Rv0107c	branch_(60, 59)
s539	128097	silent	t->g		cation-transporter ATPase I	Rv0107c	branch_(60, 59)
s540	128671	missense	g->a	A->V	cation-transporter ATPase I	Rv0107c	branch_(35, 26)
s541	129295	missense	c->a	R->L	cation-transporter ATPase I	Rv0107c	branch_(82, 8)
s542	130135	missense	g->a	A->V	cation-transporter ATPase I	Rv0107c	branch_(5, 3)
s543	130200	silent	c->t		cation-transporter ATPase I	Rv0107c	branch_(4, 3)
s544	130997	silent	c->t		hypothetical protein	Rv0108c	branch_(42, 23)
s545	131262	missense	g->t	P->Q	hypothetical protein	Rv0108c	branch_(82, 8)
s546	131303	missense	g->t	RW->RC	hypothetical protein	Rv0108c	branch_(47, 38)
s547	131780	silent	g->t		PE-PGRS family protein	Rv0109	branch_(75, 74)
s548	133205	silent	g->t		integral membrane protein	Rv0110	branch_(82, 8)
s549	133510	missense	a->c	D->A	integral membrane protein	Rv0110	branch_(80, 70)
s550	133839	intergenic	c->t			IG-Rv0110-Rv0111	branch_(52, 21)
s551	133862	intergenic	g->a			IG-Rv0110-Rv0111	branch_(25, 20)
s552	134002	intergenic	t->g			IG-Rv0111-Rv0112	branch_(82, 8)
s553	134014	missense	c->t	A->V	transmembrane acyltransferase	Rv0111	branch_(43, 37)
s554	134024	silent	t->c		transmembrane acyltransferase	Rv0111	branch_(48, 13)
s555	134555	silent	c->a		transmembrane acyltransferase	Rv0111	branch_(58, 6)
s556	134683	missense	c->a	A->E	transmembrane acyltransferase	Rv0111	branch_(80, 70)
s557	135329	silent	c->t		transmembrane acyltransferase	Rv0111	branch_(14, 13)
s558	135398	missense	g->a	M->I	transmembrane acyltransferase	Rv0111	branch_(43, 37)
s559	135542	silent	g->a		transmembrane acyltransferase	Rv0111	branch_(35, 26)
s560	135548	missense	g->c	Q->H	transmembrane acyltransferase	Rv0111	branch_(51, 24)
s561	135569	missense	c->g	D->E	transmembrane acyltransferase	Rv0111	branch_(49, 22)
s562	135833	silent	t->c		transmembrane acyltransferase	Rv0111	branch_(42, 23)
s563	136351	silent	g->a		GDP-mannose 4,6-dehydratase	Rv0112	branch_(57, 43)
s564	136450	silent	c->t		GDP-mannose 4,6-dehydratase	Rv0112	branch_(39, 14)
s565	137085	missense	a->g	D->G	GDP-mannose 4,6-dehydratase	Rv0112	branch_(58, 6)
s566	137163	missense	a->t	Q->L	GDP-mannose 4,6-dehydratase	Rv0112	branch_(82, 8)
s567	137185	silent	g->a		GDP-mannose 4,6-dehydratase	Rv0112	branch_(6, 5)
s568	137233	silent	c->t		GDP-mannose 4,6-dehydratase	Rv0112	branch_(69, 7)
s569	137273	missense	g->c	E->D	phosphoheptose isomerase	Rv0112	branch_(33, 27)
s570	137614	missense	a->g	Y->C	phosphoheptose isomerase	Rv0113	branch_(46, 44)
s571	137673	missense	g->a	A->T	phosphoheptose isomerase	Rv0113	branch_(77, 69)
s572	137704	missense	t->a	V->E	phosphoheptose isomerase	Rv0113	branch_(81, 58)
s573	137823	missense	a->g	T->A	phosphoheptose isomerase	Rv0113	branch_(75, 74)
s574	138083	missense	t->c	L->P	D-alpha,beta-D-heptose-1,7-biphosphate phosphatase	Rv0114	branch_(82, 8)
s575	138796	missense	g->a	G->D	D-alpha-D-heptose-7-phosphate kinase	Rv0115	branch_(68, 12)
s576	138812	silent	c->t		D-alpha-D-heptose-7-phosphate kinase	Rv0115	branch_(80, 70)
s577	139144	missense	c->t	S->L	D-alpha-D-heptose-7-phosphate kinase	Rv0115	branch_(81, 58)
s578	139297	missense	g->t	G->V	D-alpha-D-heptose-7-phosphate kinase	Rv0115	branch_(13, 11)
s579	139352	missense	c->g	H->Q	D-alpha-D-heptose-7-phosphate kinase	Rv0115	branch_(64, 62)
s580	139520	silent	c->a		D-alpha-D-heptose-7-phosphate kinase	Rv0115	branch_(48, 13)
s581	139756	intergenic	t->c			IG-Rv0115-Rv0116c	branch_(9, 8)
s582	139952	intergenic	g->a			IG-Rv0115-Rv0116c	branch_(67, 12)
s583	139954	intergenic	a->c			IG-Rv0115-Rv0116c	branch_(69, 7)
s584	140215	intergenic	c->t			IG-Rv0115-Rv0116c	branch_(49, 22)
s585	140644	missense	c->t	G->R	hypothetical protein	Rv0116c	branch_(43, 37)
s586	140823	missense	c->g	R->P	hypothetical protein	Rv0116c	branch_(80, 70)
s587	140857	missense	c->t	V->M	hypothetical protein	Rv0116c	branch_(71, 70)
s588	140875	missense	c->t	V->M	hypothetical protein	Rv0116c	branch_(59, 58)
s589	141137	intergenic	t->c			IG-Rv0116c-Rv0117	branch_(51, 24)
s590	141261	missense	c->t	A->V	oxidative stress response regulatory protein OXYS	Rv0117	branch_(43, 37)
s591	141375	missense	g->a	R->H	oxidative stress response regulatory protein OXYS	Rv0117	branch_(60, 59)
s592	141516	missense	c->t	S->F	oxidative stress response regulatory protein OXYS	Rv0117	branch_(59, 58)
s593	141623	missense	g->a	D->N	oxidative stress response regulatory protein OXYS	Rv0117	branch_(15, 14)
s594	141889	silent	a->g		oxidative stress response regulatory protein OXYS	Rv0117	branch_(68, 12)
s595	142317	silent	c->t		oxalyl-CoA decarboxylase	Rv0118c	branch_(49, 22)
s596	142643	missense	t->a	I->F	oxalyl-CoA decarboxylase	Rv0118c	branch_(57, 43)
s597	142674	missense	g->c	G->X	oxalyl-CoA decarboxylase	Rv0118c	branch_(50, 38)
s598	142726	missense	g->t	A->D	oxalyl-CoA decarboxylase	Rv0118c	branch_(47, 38)
s599	142799	missense	g->a	R->C	oxalyl-CoA decarboxylase	Rv0118c	branch_(82, 8)
s600	143207	missense	t->c	S->G	oxalyl-CoA decarboxylase	Rv0118c	branch_(19, 9)
s601	143535	silent	c->t		oxalyl-CoA decarboxylase	Rv0118c	branch_(38, 37)
s602	144345	silent	c->a		acyl-CoA synthetase	Rv0119	branch_(43, 37)
s603	144390	silent	g->a		acyl-CoA synthetase	Rv0119	branch_(51, 24)
s604	144564	silent	c->t		acyl-CoA synthetase	Rv0119	branch_(69, 7)
s605	144570	missense	c->g	F->L	acyl-CoA synthetase	Rv0119	branch_(37, 5)
s606	144699	silent	c->a		acyl-CoA synthetase	Rv0119	branch_(17, 16)
s607	144804	missense	c->g	D->E	acyl-CoA synthetase	Rv0119	branch_(36, 25)
s608	144865	silent	c->t		acyl-CoA synthetase	Rv0119	branch_(62, 10)
s609	145189	missense	g->a	V->M	acyl-CoA synthetase	Rv0119	branch_(80, 70)
s610	145591	missense	c->t	R->C	acyl-CoA synthetase	Rv0119	branch_(73, 71)
s611	145966	silent	g->a		elongation factor G	Rv0120c	branch_(4, 3)
s612	146087	missense	t->c	N->S	elongation factor G	Rv0120c	branch_(52, 21)
s613	146236	silent	c->g		elongation factor G	Rv0120c	branch_(15, 14)
s614	146788	silent	g->a		elongation factor G	Rv0120c	branch_(69, 7)
s615	146872	silent	c->t		elongation factor G	Rv0120c	branch_(69, 7)
s616	146893	silent	c->t		elongation factor G	Rv0120c	branch_(58, 6)
s617	146909	missense	g->a	P->L	elongation factor G	Rv0120c	branch_(50, 38)
s618	147262	missense	g->t	D->E	elongation factor G	Rv0120c	branch_(11, 10)
s619	147263	missense	t->g	D->A	elongation factor G	Rv0120c	branch_(80, 70)
s620	147650	missense	t->c	E->G	elongation factor G	Rv0120c	branch_(43, 37)
s621	147655	silent	g->c		elongation factor G	Rv0120c	branch_(36, 25)
s622	147873	silent	a->c		elongation factor G	Rv0120c	branch_(5, 3)
s623	147919	intergenic	a->g			IG-Rv0121c-Rv0122	branch_(51, 24)
s624	147946	intergenic	c->t			IG-Rv0121c-Rv0122	branch_(28, 27)
s625	147970	intergenic	c->t			IG-Rv0121c-Rv0122	branch_(78, 77)
s626	147985	intergenic	c->t			IG-Rv0121c-Rv0122	branch_(51, 24)
s627	148091	intergenic	g->a			IG-Rv0121c-Rv0122	branch_(38, 37)
s628	148187	intergenic	g->a			IG-Rv0121c-Rv0122	branch_(59, 58)
s629	148314	intergenic	a->g			IG-Rv0121c-Rv0122	branch_(34, 15)
s630	148481	intergenic	c->t			IG-Rv0121c-Rv0122	branch_(80, 70)
s631	148528	silent	g->a		hypothetical protein	Rv0122	branch_(73, 71)
s632	148596	missense	g->a	A->T	hypothetical protein	Rv0122	branch_(73, 71)
s633	151026	intergenic	c->t			IG-Rv0124-Rv0125	branch_(81, 58)
s634	151038	intergenic	c->t			IG-Rv0124-Rv0125	branch_(67, 12)
s635	151092	intergenic	g->a			IG-Rv0124-Rv0125	branch_(82, 8)
s636	151168	silent	c->g		serine protease PepA	Rv0125	branch_(82, 8)
s637	151552	silent	c->t		serine protease PepA	Rv0125	branch_(67, 12)
s638	152275	silent	g->c		trehalose synthase TRES	Rv0125	branch_(38, 37)
s639	152617	silent	c->t		trehalose synthase TRES	Rv0126	branch_(42, 23)
s640	152707	silent	g->t		trehalose synthase TRES	Rv0126	branch_(18, 16)
s641	153263	missense	a->g	I->V	trehalose synthase TRES	Rv0126	branch_(38, 37)
s642	154283	missense	t->c	S->P	hypothetical protein	Rv0127	branch_(52, 21)
s643	154671	missense	g->a	S->N	hypothetical protein	Rv0127	branch_(40, 24)
s644	154990	silent	g->t		hypothetical protein	Rv0127	branch_(48, 13)
s645	155099	missense	g->a	A->T	hypothetical protein	Rv0127	branch_(61, 59)
s646	155183	silent	c->a		hypothetical protein	Rv0127	branch_(44, 43)
s647	155293	silent	g->a		hypothetical protein	Rv0127	branch_(51, 24)
s648	155478	missense	c->a	A->E	hypothetical protein	Rv0127	branch_(58, 6)
s649	155689	missense	g->a	G->D	transmembrane protein	Rv0128	branch_(57, 43)
s650	156221	silent	c->g		transmembrane protein	Rv0128	branch_(40, 24)
s651	156304	missense	g->a	G->D	transmembrane protein	Rv0128	branch_(74, 70)
s652	157043	silent	c->t		secreted antigen 85-C FBPC (85C) (antigen 85 complex C) (AG58C) (Mycolyl transferase 85C) (fibronect	Rv0129c	branch_(81, 58)
s653	157129	missense	c->t	G->S	secreted antigen 85-C FBPC (85C) (antigen 85 complex C) (AG58C) (Mycolyl transferase 85C) (fibronect	Rv0129c	branch_(62, 10)
s654	157292	missense	c->t	EL->EF	secreted antigen 85-C FBPC (85C) (antigen 85 complex C) (AG58C) (Mycolyl transferase 85C) (fibronect	Rv0129c	branch_(25, 20)
s655	157831	silent	a->c		hypothetical protein	Rv0129c	branch_(48, 13)
s656	158200	silent	g->a		hypothetical protein	Rv0130	branch_(81, 58)
s657	159142	missense	c->a	D->Y	acyl-CoA dehydrogenase FADE1	Rv0131c	branch_(61, 59)
s658	159179	silent	g->a		acyl-CoA dehydrogenase FADE1	Rv0131c	branch_(4, 3)
s659	159817	missense	g->a	RI->WI	acyl-CoA dehydrogenase FADE1	Rv0132c	branch_(82, 8)
s660	160335	missense	t->c	N->D	f420-dependent glucose-6-phosphate dehydrogenase Fgd2	Rv0132c	branch_(51, 24)
s661	160344	missense	c->t	E->K	f420-dependent glucose-6-phosphate dehydrogenase Fgd2	Rv0132c	branch_(4, 3)
s662	160554	missense	c->a	D->Y	f420-dependent glucose-6-phosphate dehydrogenase Fgd2	Rv0132c	branch_(81, 58)
s663	160953	missense	g->t	V->F	acetyltransferase	Rv0133	branch_(5, 3)
s664	160976	missense	c->g	N->K	acetyltransferase	Rv0133	branch_(69, 7)
s665	161226	missense	c->t	P->S	acetyltransferase	Rv0133	branch_(34, 15)
s666	161351	missense	c->a	Y->*	acetyltransferase	Rv0133	branch_(3, 0)
s667	161503	intergenic	g->a			IG-Rv0133-Rv0134	branch_(35, 26)
s668	162226	silent	g->a		epoxide hydrolase EphF	Rv0134	branch_(69, 7)
s669	162308	missense	g->a	G->R	epoxide hydrolase EphF	Rv0134	branch_(4, 3)
s670	162339	silent	a->g		epoxide hydrolase EphF	Rv0134	branch_(5, 3)
s671	162474	missense	a->g	D->G	epoxide hydrolase EphF	Rv0134	branch_(34, 15)
s672	162581	missense	g->a	G->S	epoxide hydrolase EphF	Rv0134	branch_(25, 20)
s673	162622	silent	g->a		epoxide hydrolase EphF	Rv0134	branch_(43, 37)
s674	162948	missense	g->a	T->I	transcriptional regulatory protein	Rv0135c	branch_(43, 37)
s675	163148	missense	g->a	R->RH	transcriptional regulatory protein	Rv0135c	branch_(58, 6)
s676	163214	missense	c->t	ES->EF	transcriptional regulatory protein	Rv0135c	branch_(68, 12)
s677	163290	silent	a->g		cytochrome P450 138	Rv0135c	branch_(45, 44)
s678	163306	missense	a->g	T->A	cytochrome P450 138	Rv0135c	branch_(80, 70)
s679	163333	missense	g->a	A->T	cytochrome P450 138	Rv0135c	branch_(82, 8)
s680	163573	silent	a->c		cytochrome P450 138	Rv0136	branch_(24, 23)
s681	163705	missense	c->t	P->F	cytochrome P450 138	Rv0136	branch_(14, 13)
s682	163706	missense	c->t	P->F	cytochrome P450 138	Rv0136	branch_(14, 13)
s683	163940	missense	a->g	K->R	cytochrome P450 138	Rv0136	branch_(48, 13)
s684	163950	silent	c->t		cytochrome P450 138	Rv0136	branch_(82, 8)
s685	164676	silent	g->a		cytochrome P450 138	Rv0136	branch_(42, 23)
s686	164682	silent	c->t		cytochrome P450 138	Rv0136	branch_(80, 70)
s687	164846	missense	g->a	P->S	methionine sulfoxide reductase A	Rv0137c	branch_(38, 37)
s688	164868	silent	g->t		methionine sulfoxide reductase A	Rv0137c	branch_(50, 38)
s689	164936	missense	c->t	D->N	methionine sulfoxide reductase A	Rv0137c	branch_(58, 6)
s690	164942	missense	c->t	A->T	methionine sulfoxide reductase A	Rv0137c	branch_(81, 58)
s691	165609	missense	a->g	D->G	hypothetical protein	Rv0138	branch_(4, 3)
s692	165665	missense	a->g	I->V	hypothetical protein	Rv0138	branch_(36, 25)
s693	166348	silent	a->c		oxidoreductase	Rv0139	branch_(49, 22)
s694	166506	missense	g->a	R->H	oxidoreductase	Rv0139	branch_(4, 3)
s695	166852	intergenic	c->t			IG-Rv0139-Rv0140	branch_(51, 24)
s696	166861	intergenic	c->a			IG-Rv0139-Rv0140	branch_(18, 16)
s697	170577	silent	t->c		TetR family transcriptional regulator	Rv0144	branch_(68, 12)
s698	170642	missense	t->g	L->R	TetR family transcriptional regulator	Rv0144	branch_(71, 70)
s699	170671	missense	g->a	A->T	TetR family transcriptional regulator	Rv0144	branch_(62, 10)
s700	170755	missense	g->t	E->*	TetR family transcriptional regulator	Rv0144	branch_(74, 70)
s701	170907	silent	a->c		TetR family transcriptional regulator	Rv0144	branch_(7, 6)
s702	171129	intergenic	g->a			IG-Rv0144-Rv0145	branch_(72, 71)
s703	171155	intergenic	t->c			IG-Rv0144-Rv0145	branch_(73, 71)
s704	171163	intergenic	t->g			IG-Rv0144-Rv0145	branch_(60, 59)
s705	172345	silent	c->a		hypothetical protein	Rv0146	branch_(67, 12)
s706	172492	silent	c->g		hypothetical protein	Rv0146	branch_(62, 10)
s707	172559	missense	g->t	A->S	hypothetical protein	Rv0146	branch_(47, 38)
s708	172901	silent	c->a		hypothetical protein	Rv0146	branch_(4, 3)
s709	173050	silent	c->t		hypothetical protein	Rv0146	branch_(48, 13)
s710	173460	missense	c->t	R->C	aldehyde dehydrogenase	Rv0147	branch_(82, 8)
s711	173621	silent	c->t		aldehyde dehydrogenase	Rv0147	branch_(57, 43)
s712	173914	missense	a->g	D->G	aldehyde dehydrogenase	Rv0147	branch_(82, 8)
s713	173986	missense	c->t	P->L	aldehyde dehydrogenase	Rv0147	branch_(33, 27)
s714	174058	missense	a->g	K->R	aldehyde dehydrogenase	Rv0147	branch_(82, 8)
s715	174138	missense	c->t	R->C	aldehyde dehydrogenase	Rv0147	branch_(76, 74)
s716	174193	missense	c->t	A->V	aldehyde dehydrogenase	Rv0147	branch_(80, 70)
s717	174221	missense	g->c	Q->H	aldehyde dehydrogenase	Rv0147	branch_(18, 16)
s718	174684	silent	c->a		aldehyde dehydrogenase	Rv0147	branch_(51, 24)
s719	175270	silent	c->t		short-chain type dehydrogenase/reductase	Rv0148	branch_(66, 63)
s720	175994	missense	g->a	V->I	quinone oxidoreductase	Rv0149	branch_(68, 12)
s721	176222	missense	g->a	G->S	quinone oxidoreductase	Rv0149	branch_(72, 71)
s722	176253	missense	c->t	A->V	quinone oxidoreductase	Rv0149	branch_(34, 15)
s723	176303	missense	c->t	H->Y	quinone oxidoreductase	Rv0149	branch_(35, 26)
s724	176888	missense	g->a	A->V	hypothetical protein	Rv0150c	branch_(61, 59)
s725	176940	missense	g->t	P->T	hypothetical protein	Rv0150c	branch_(17, 16)
s726	177150	intergenic	g->c			IG-Rv0150c-Rv0151c	branch_(70, 69)
s727	177175	intergenic	g->c			IG-Rv0150c-Rv0151c	branch_(77, 69)
s728	177389	intergenic	t->c			IG-Rv0150c-Rv0151c	branch_(47, 38)
s729	177596	missense	t->c	I->V	PE family protein	Rv0151c	branch_(23, 19)
s730	177829	missense	g->a	P->L	PE family protein	Rv0151c	branch_(43, 37)
s731	177857	silent	g->a		PE family protein	Rv0151c	branch_(52, 21)
s732	177866	missense	c->g	V->L	PE family protein	Rv0151c	branch_(82, 8)
s733	178123	missense	c->t	G->D	PE family protein	Rv0151c	branch_(66, 63)
s734	178205	missense	c->g	G->R	PE family protein	Rv0151c	branch_(62, 10)
s735	178453	missense	c->g	G->A	PE family protein	Rv0151c	branch_(62, 10)
s736	178554	silent	c->t		PE family protein	Rv0151c	branch_(65, 63)
s737	178861	missense	g->a	P->L	PE family protein	Rv0151c	branch_(81, 58)
s738	178941	missense	g->t	N->K	PE family protein	Rv0151c	branch_(27, 26)
s739	178946	missense	c->t	A->T	PE family protein	Rv0151c	branch_(23, 19)
s740	179234	missense	c->t	G->R	PE family protein	Rv0151c	branch_(5, 3)
s741	179545	missense	g->t	T->N	PE family protein	Rv0152c	branch_(50, 38)
s742	180025	missense	c->t	G->E	PE family protein	Rv0152c	branch_(25, 20)
s743	180586	missense	c->t	C->Y	PE family protein	Rv0152c	branch_(38, 37)
s744	180879	missense	t->c	PI->PV	PE family protein	Rv0152c	branch_(80, 70)
s745	181090	intergenic	c->t			IG-Rv0152c-Rv0153c	branch_(62, 10)
s746	181415	missense	g->a	R->C	phosphotyrosine protein phosphatase PTPB (protein-tyrosine-phosphatase) (PTPase)	Rv0153c	branch_(57, 43)
s747	181672	missense	t->c	D->G	phosphotyrosine protein phosphatase PTPB (protein-tyrosine-phosphatase) (PTPase)	Rv0153c	branch_(5, 3)
s748	182480	missense	c->t	G->D	acyl-CoA dehydrogenase FADE2	Rv0154c	branch_(47, 38)
s749	182620	missense	c->t	M->I	acyl-CoA dehydrogenase FADE2	Rv0154c	branch_(73, 71)
s750	182824	silent	g->a		acyl-CoA dehydrogenase FADE2	Rv0154c	branch_(16, 15)
s751	182831	missense	c->t	G->D	acyl-CoA dehydrogenase FADE2	Rv0154c	branch_(81, 58)
s752	183091	silent	c->g		acyl-CoA dehydrogenase FADE2	Rv0154c	branch_(15, 14)
s753	183391	silent	c->g		acyl-CoA dehydrogenase FADE2	Rv0154c	branch_(75, 74)
s754	183399	missense	t->g	T->P	acyl-CoA dehydrogenase FADE2	Rv0154c	branch_(61, 59)
s755	183405	missense	t->g	T->P	acyl-CoA dehydrogenase FADE2	Rv0154c	branch_(39, 14)
s756	183575	missense	c->t	R->K	acyl-CoA dehydrogenase FADE2	Rv0154c	branch_(43, 37)
s757	183657	silent	g->a		NAD(P) transhydrogenase subunit alpha	Rv0155	branch_(50, 38)
s758	184275	silent	t->c		NAD(P) transhydrogenase subunit alpha	Rv0155	branch_(50, 38)
s759	184321	missense	a->g	T->A	NAD(P) transhydrogenase subunit alpha	Rv0155	branch_(82, 8)
s760	184638	silent	g->a		NAD(P) transhydrogenase subunit alpha	Rv0155	branch_(82, 8)
s761	184727	missense	a->g	Y->C	NAD(P) transhydrogenase subunit alpha	Rv0156	branch_(5, 3)
s762	184876	missense	g->t	V->F	NAD(P) transhydrogenase subunit alpha	Rv0156	branch_(18, 16)
s763	185352	missense	g->t	A->L	NAD(P) transhydrogenase subunit beta	Rv0157	branch_(45, 44)
s764	185353	missense	c->t	A->L	NAD(P) transhydrogenase subunit beta	Rv0157	branch_(45, 44)
s765	185535	missense	g->a	G->R	NAD(P) transhydrogenase subunit beta	Rv0157	branch_(50, 38)
s766	186158	silent	g->a		NAD(P) transhydrogenase subunit beta	Rv0157	branch_(61, 59)
s767	186175	missense	a->g	D->G	NAD(P) transhydrogenase subunit beta	Rv0157	branch_(48, 13)
s768	186182	silent	c->t		NAD(P) transhydrogenase subunit beta	Rv0157	branch_(50, 38)
s769	186209	silent	c->t		NAD(P) transhydrogenase subunit beta	Rv0157	branch_(61, 59)
s770	186661	intergenic	t->g			IG-Rv0157-Rv0158	branch_(48, 13)
s771	186895	silent	c->t		TetR family transcriptional regulator	Rv0158	branch_(80, 70)
s772	187086	missense	c->t	P->L	TetR family transcriptional regulator	Rv0158	branch_(44, 43)
s773	187168	silent	g->a		TetR family transcriptional regulator	Rv0158	branch_(76, 74)
s774	187285	silent	g->c		TetR family transcriptional regulator	Rv0158	branch_(80, 70)
s775	187327	silent	c->t		TetR family transcriptional regulator	Rv0158	branch_(76, 74)
s776	187420	missense	g->c	K->N	TetR family transcriptional regulator	Rv0158	branch_(42, 23)
s777	187738	missense	g->a	R->W	PE family protein	Rv0159c	branch_(51, 24)
s778	187889	silent	a->c		PE family protein	Rv0159c	branch_(81, 58)
s779	188077	missense	g->t	P->T	PE family protein	Rv0159c	branch_(5, 3)
s780	188317	missense	a->g	S->P	PE family protein	Rv0159c	branch_(62, 10)
s781	188856	intergenic	c->t			IG-Rv0159c-Rv0160c	branch_(59, 58)
s782	188904	intergenic	t->a			IG-Rv0159c-Rv0160c	branch_(82, 8)
s783	189508	missense	a->c	F->C	PE family protein	Rv0160c	branch_(67, 12)
s784	189806	missense	c->t	V->I	PE family protein	Rv0160c	branch_(50, 38)
s785	189809	missense	c->t	A->T	PE family protein	Rv0160c	branch_(6, 5)
s786	189850	missense	a->g	F->S	PE family protein	Rv0160c	branch_(62, 10)
s787	189895	missense	g->c	P->R	PE family protein	Rv0160c	branch_(81, 58)
s788	189948	missense	c->g	K->N	PE family protein	Rv0160c	branch_(69, 7)
s789	190207	missense	c->g	R->P	PE family protein	Rv0160c	branch_(72, 71)
s790	190212	missense	g->c	F->L	PE family protein	Rv0160c	branch_(67, 12)
s791	190816	silent	a->c		oxidoreductase	Rv0161	branch_(11, 10)
s792	191032	silent	g->a		oxidoreductase	Rv0161	branch_(66, 63)
s793	191311	silent	c->t		oxidoreductase	Rv0161	branch_(81, 58)
s794	191470	silent	g->a		oxidoreductase	Rv0161	branch_(37, 5)
s795	191512	silent	g->a		oxidoreductase	Rv0161	branch_(74, 70)
s796	191541	missense	g->a	R->H	oxidoreductase	Rv0161	branch_(67, 12)
s797	191738	silent	c->t		oxidoreductase	Rv0161	branch_(49, 22)
s798	191987	silent	g->a		zinc-type alcohol dehydrogenase E subunit	Rv0162c	branch_(4, 3)
s799	192924	missense	c->a	R->L	zinc-type alcohol dehydrogenase E subunit	Rv0162c	branch_(71, 70)
s800	193014	missense	t->c	H->R	zinc-type alcohol dehydrogenase E subunit	Rv0162c	branch_(3, 0)
s801	193381	missense	c->g	L->V	hypothetical protein	Rv0163	branch_(51, 24)
s802	193425	silent	g->a		hypothetical protein	Rv0163	branch_(81, 58)
s803	194040	missense	c->a	L->M	hypothetical protein	Rv0164	branch_(77, 69)
s804	194681	silent	g->c		GntR family transcriptional regulator	Rv0165c	branch_(52, 21)
s805	194728	missense	c->t	A->T	GntR family transcriptional regulator	Rv0165c	branch_(74, 70)
s806	194817	missense	t->c	H->R	GntR family transcriptional regulator	Rv0165c	branch_(67, 12)
s807	194914	missense	c->g	V->L	GntR family transcriptional regulator	Rv0165c	branch_(82, 8)
s808	194928	missense	t->c	H->R	GntR family transcriptional regulator	Rv0165c	branch_(81, 58)
s809	195315	missense	t->c	F->S	long-chain-fatty-acid--CoA ligase	Rv0166	branch_(43, 37)
s810	195360	missense	t->c	V->A	long-chain-fatty-acid--CoA ligase	Rv0166	branch_(9, 8)
s811	195566	missense	t->g	S->A	long-chain-fatty-acid--CoA ligase	Rv0166	branch_(5, 3)
s812	195682	silent	c->g		long-chain-fatty-acid--CoA ligase	Rv0166	branch_(13, 11)
s813	195698	missense	c->g	H->D	long-chain-fatty-acid--CoA ligase	Rv0166	branch_(78, 77)
s814	196353	missense	c->t	P->L	long-chain-fatty-acid--CoA ligase	Rv0166	branch_(72, 71)
s815	196522	silent	c->t		long-chain-fatty-acid--CoA ligase	Rv0166	branch_(27, 26)
s816	196642	silent	c->t		long-chain-fatty-acid--CoA ligase	Rv0166	branch_(52, 21)
s817	196767	intergenic	c->t			IG-Rv0166-Rv0167	branch_(39, 14)
s818	196841	intergenic	g->a			IG-Rv0166-Rv0167	branch_(65, 63)
s819	196874	intergenic	c->t			IG-Rv0167-Rv0168	branch_(69, 7)
s820	197289	silent	c->t		integral membrane protein YRBE1A	Rv0167	branch_(33, 27)
s821	197727	missense	g->t	G->V	integral membrane protein YRBE1B	Rv0168	branch_(68, 12)
s822	198136	silent	c->a		integral membrane protein YRBE1B	Rv0168	branch_(5, 3)
s823	198313	missense	c->a	D->E	integral membrane protein YRBE1B	Rv0168	branch_(43, 37)
s824	198401	missense	g->t	GE->CD	integral membrane protein YRBE1B	Rv0168	branch_(62, 10)
s825	198948	missense	g->a	V->I	MCE-family protein MCE1A	Rv0169	branch_(64, 62)
s826	199470	missense	t->g	S->A	MCE-family protein MCE1A	Rv0169	branch_(19, 9)
s827	199608	missense	c->t	P->S	MCE-family protein MCE1A	Rv0169	branch_(5, 3)
s828	199734	missense	c->g	P->A	MCE-family protein MCE1A	Rv0169	branch_(59, 58)
s829	199857	missense	g->a	V->I	MCE-family protein MCE1A	Rv0169	branch_(74, 70)
s830	199859	missense	c->a	V->I	MCE-family protein MCE1A	Rv0169	branch_(74, 70)
s831	200283	missense	t->c	L->S	MCE-family protein MCE1B	Rv0170	branch_(79, 77)
s832	200379	missense	c->t	A->V	MCE-family protein MCE1B	Rv0170	branch_(77, 69)
s833	200430	missense	t->c	I->T	MCE-family protein MCE1B	Rv0170	branch_(7, 6)
s834	200697	missense	t->g	V->G	MCE-family protein MCE1B	Rv0170	branch_(68, 12)
s835	201567	missense	g->c	E->D	MCE-family protein MCE1C	Rv0171	branch_(6, 5)
s836	201949	missense	g->a	G->R	MCE-family protein MCE1C	Rv0171	branch_(63, 62)
s837	202710	missense	g->a	E->K	MCE-family protein MCE1D	Rv0172	branch_(82, 8)
s838	202715	silent	a->g		MCE-family protein MCE1D	Rv0172	branch_(57, 43)
s839	202716	missense	g->a	A->T	MCE-family protein MCE1D	Rv0172	branch_(57, 43)
s840	203038	missense	t->c	I->T	MCE-family protein MCE1D	Rv0172	branch_(15, 14)
s841	203269	missense	c->t	A->V	MCE-family protein MCE1D	Rv0172	branch_(25, 20)
s842	203379	missense	g->t	V->F	MCE-family protein MCE1D	Rv0172	branch_(67, 12)
s843	203639	silent	g->a		MCE-family protein MCE1D	Rv0172	branch_(37, 5)
s844	203826	missense	g->a	E->K	MCE-family protein MCE1D	Rv0172	branch_(68, 12)
s845	204094	silent	g->t		MCE-family lipoprotein LprK	Rv0173	branch_(16, 15)
s846	204140	missense	c->g	L->V	MCE-family lipoprotein LprK	Rv0173	branch_(74, 70)
s847	204315	missense	a->g	K->R	MCE-family lipoprotein LprK	Rv0173	branch_(59, 58)
s848	204504	missense	c->g	A->G	MCE-family lipoprotein LprK	Rv0173	branch_(82, 8)
s849	205104	missense	c->t	S->F	MCE-family lipoprotein LprK	Rv0173	branch_(82, 8)
s850	205386	silent	g->c		MCE-family protein MCE1F	Rv0174	branch_(39, 14)
s851	205441	missense	g->t	V->F	MCE-family protein MCE1F	Rv0174	branch_(82, 8)
s852	205588	missense	t->c	Y->H	MCE-family protein MCE1F	Rv0174	branch_(57, 43)
s853	205771	missense	c->t	Q->Y	MCE-family protein MCE1F	Rv0174	branch_(82, 8)
s854	205773	missense	a->c	Q->Y	MCE-family protein MCE1F	Rv0174	branch_(82, 8)
s855	206128	missense	c->g	L->V	MCE-family protein MCE1F	Rv0174	branch_(64, 62)
s856	206339	missense	t->c	L->P	MCE-family protein MCE1F	Rv0174	branch_(52, 21)
s857	206453	missense	g->c	G->A	MCE-family protein MCE1F	Rv0174	branch_(49, 22)
s858	206481	silent	c->g		MCE-family protein MCE1F	Rv0174	branch_(19, 9)
s859	206484	silent	g->t		MCE-family protein MCE1F	Rv0174	branch_(19, 9)
s860	206585	missense	c->g	P->R	MCE-family protein MCE1F	Rv0174	branch_(79, 77)
s861	207079	missense	g->c	R->P	mce associated membrane protein	Rv0175	branch_(62, 10)
s862	207160	missense	g->a	S->N	mce associated membrane protein	Rv0175	branch_(41, 22)
s863	207226	missense	t->c	M->T	mce associated membrane protein	Rv0175	branch_(25, 20)
s864	207283	missense	c->t	A->V	mce associated membrane protein	Rv0175	branch_(50, 38)
s865	207592	silent	g->a		mce associated transmembrane protein	Rv0176	branch_(82, 8)
s866	208299	missense	c->t	P->L	mce associated transmembrane protein	Rv0176	branch_(59, 58)
s867	208403	missense	c->t	PT->SI	mce associated transmembrane protein	Rv0176	branch_(43, 37)
s868	208425	silent	c->t		MCE associated protein	Rv0177	branch_(64, 62)
s869	208782	silent	a->c		MCE associated protein	Rv0177	branch_(68, 12)
s870	209053	missense	c->g	A->G	mce associated membrane protein	Rv0178	branch_(68, 12)
s871	209054	missense	g->a	A->G	mce associated membrane protein	Rv0178	branch_(68, 12)
s872	209058	missense	g->a	E->T	mce associated membrane protein	Rv0178	branch_(68, 12)
s873	209059	missense	a->c	E->T	mce associated membrane protein	Rv0178	branch_(68, 12)
s874	210442	missense	c->t	R->H	lipoprotein LprO	Rv0179c	branch_(6, 5)
s875	210624	silent	c->t		lipoprotein LprO	Rv0179c	branch_(62, 10)
s876	211399	silent	c->t		transmembrane protein	Rv0180c	branch_(44, 43)
s877	211548	missense	c->a	V->L	transmembrane protein	Rv0180c	branch_(82, 8)
s878	211993	missense	c->a	K->N	transmembrane protein	Rv0180c	branch_(69, 7)
s879	212165	missense	g->a	P->L	transmembrane protein	Rv0180c	branch_(82, 8)
s880	212197	missense	t->g	K->N	transmembrane protein	Rv0180c	branch_(34, 15)
s881	212254	silent	g->a		transmembrane protein	Rv0180c	branch_(5, 3)
s882	212353	missense	c->t	R->H	hypothetical protein	Rv0181c	branch_(25, 20)
s883	212674	missense	t->g	E->A	hypothetical protein	Rv0181c	branch_(80, 70)
s884	213101	missense	t->a	D->V	RNA polymerase factor sigma-70	Rv0182c	branch_(66, 63)
s885	213147	missense	c->a	D->Y	RNA polymerase factor sigma-70	Rv0182c	branch_(13, 11)
s886	213281	missense	c->t	G->D	RNA polymerase factor sigma-70	Rv0182c	branch_(13, 11)
s887	213536	missense	a->g	V->A	RNA polymerase factor sigma-70	Rv0182c	branch_(79, 77)
s888	213951	missense	g->a	P->S	RNA polymerase factor sigma-70	Rv0182c	branch_(76, 74)
s889	215160	silent	c->g		hypothetical protein	Rv0184	branch_(60, 59)
s890	215238	silent	c->t		hypothetical protein	Rv0184	branch_(69, 7)
s891	215526	silent	c->t		hypothetical protein	Rv0184	branch_(81, 58)
s892	216469	silent	c->t		beta-glucosidase	Rv0186	branch_(68, 12)
s893	217779	missense	t->g	I->S	beta-glucosidase	Rv0186	branch_(3, 0)
s894	217794	missense	t->c	V->A	beta-glucosidase	Rv0186	branch_(82, 8)
s895	218599	intergenic	t->c			IG-Rv4014-Rv0187	branch_(62, 10)
s896	218726	missense	a->g	N->D	O-methyltransferase	Rv0187	branch_(34, 15)
s897	219120	missense	a->g	D->G	O-methyltransferase	Rv0187	branch_(41, 22)
s898	219144	missense	c->t	A->V	O-methyltransferase	Rv0187	branch_(3, 0)
s899	219567	missense	a->g	T->A	transmembrane protein	Rv0188	branch_(82, 8)
s900	219722	silent	g->t		transmembrane protein	Rv0188	branch_(74, 70)
s901	219755	silent	g->t		transmembrane protein	Rv0188	branch_(38, 37)
s902	220050	silent	c->t		dihydroxy-acid dehydratase	Rv0189c	branch_(23, 19)
s903	220414	missense	t->g	D->A	dihydroxy-acid dehydratase	Rv0189c	branch_(48, 13)
s904	220557	silent	t->a		dihydroxy-acid dehydratase	Rv0189c	branch_(50, 38)
s905	220873	missense	a->c	V->G	dihydroxy-acid dehydratase	Rv0189c	branch_(55, 52)
s906	221480	missense	c->a	A->S	dihydroxy-acid dehydratase	Rv0189c	branch_(80, 70)
s907	222486	silent	c->t		integral membrane protein	Rv0191	branch_(42, 23)	branch_(60, 59)
s908	222925	missense	g->a	A->T	integral membrane protein	Rv0191	branch_(13, 11)
s909	222935	missense	a->c	H->P	integral membrane protein	Rv0191	branch_(51, 24)
s910	222936	missense	c->a	H->P	integral membrane protein	Rv0191	branch_(51, 24)
s911	223531	intergenic	c->a			IG-Rv0191-Rv0192	branch_(39, 14)
s912	223942	missense	t->c	S->P	hypothetical protein	Rv0192A	branch_(52, 21)
s913	224338	missense	c->t	P->S	hypothetical protein	Rv0192A	branch_(62, 10)
s914	224414	missense	a->g	N->S	hypothetical protein	Rv0192A	branch_(58, 6)
s915	224441	missense	t->c	V->A	hypothetical protein	Rv0192A	branch_(3, 0)
s916	225039	silent	g->a		hypothetical protein	Rv0193c	branch_(74, 70)
s917	225264	silent	g->a		hypothetical protein	Rv0193c	branch_(61, 59)
s918	225274	missense	t->c	Y->C	hypothetical protein	Rv0193c	branch_(65, 63)
s919	225315	silent	g->a		hypothetical protein	Rv0193c	branch_(77, 69)
s920	225323	missense	t->c	K->E	hypothetical protein	Rv0193c	branch_(52, 21)
s921	225416	missense	a->g	W->R	hypothetical protein	Rv0193c	branch_(43, 37)
s922	225500	missense	c->t	G->S	hypothetical protein	Rv0193c	branch_(64, 62)
s923	225610	missense	g->a	A->V	hypothetical protein	Rv0193c	branch_(81, 58)
s924	225668	missense	c->t	G->S	hypothetical protein	Rv0193c	branch_(9, 8)
s925	226163	missense	c->a	A->S	hypothetical protein	Rv0193c	branch_(65, 63)
s926	226676	intergenic	g->a			IG-Rv0193c-Rv0194	branch_(69, 7)
s927	226929	missense	c->t	R->C	drugs-transport transmembrane ATP-binding protein ABC transporter	Rv0194	branch_(71, 70)
s928	227022	missense	a->g	I->V	drugs-transport transmembrane ATP-binding protein ABC transporter	Rv0194	branch_(4, 3)
s929	227098	missense	t->c	M->T	drugs-transport transmembrane ATP-binding protein ABC transporter	Rv0194	branch_(52, 21)
s930	227413	missense	t->c	L->P	drugs-transport transmembrane ATP-binding protein ABC transporter	Rv0194	branch_(61, 59)
s931	227468	silent	c->t		drugs-transport transmembrane ATP-binding protein ABC transporter	Rv0194	branch_(59, 58)
s932	227509	missense	t->c	F->S	drugs-transport transmembrane ATP-binding protein ABC transporter	Rv0194	branch_(67, 12)
s933	227545	missense	c->t	T->M	drugs-transport transmembrane ATP-binding protein ABC transporter	Rv0194	branch_(5, 3)
s934	227697	missense	a->g	T->A	drugs-transport transmembrane ATP-binding protein ABC transporter	Rv0194	branch_(82, 8)
s935	227860	missense	c->t	P->L	drugs-transport transmembrane ATP-binding protein ABC transporter	Rv0194	branch_(5, 3)
s936	227900	missense	c->g	F->L	drugs-transport transmembrane ATP-binding protein ABC transporter	Rv0194	branch_(44, 43)
s937	227976	missense	g->a	G->S	drugs-transport transmembrane ATP-binding protein ABC transporter	Rv0194	branch_(44, 43)
s938	228316	missense	c->t	A->V	drugs-transport transmembrane ATP-binding protein ABC transporter	Rv0194	branch_(72, 71)
s939	228374	silent	t->g		drugs-transport transmembrane ATP-binding protein ABC transporter	Rv0194	branch_(39, 14)
s940	228847	missense	g->a	R->H	drugs-transport transmembrane ATP-binding protein ABC transporter	Rv0194	branch_(35, 26)
s941	229448	missense	g->c	L->F	drugs-transport transmembrane ATP-binding protein ABC transporter	Rv0194	branch_(58, 6)
s942	230170	missense	c->t	P->L	drugs-transport transmembrane ATP-binding protein ABC transporter	Rv0194	branch_(11, 10)
s943	230197	missense	c->t	T->I	drugs-transport transmembrane ATP-binding protein ABC transporter	Rv0194	branch_(59, 58)
s944	230258	silent	c->t		drugs-transport transmembrane ATP-binding protein ABC transporter	Rv0194	branch_(38, 37)
s945	231114	silent	c->g		two component transcriptional regulatory protein	Rv0195	branch_(52, 21)
s946	231589	intergenic	t->c			IG-Rv0195-Rv0196	branch_(5, 3)
s947	232574	missense	g->t	G->V	oxidoreductase	Rv0197	branch_(24, 23)
s948	232985	missense	t->c	V->A	oxidoreductase	Rv0197	branch_(82, 8)
s949	233016	silent	c->t		oxidoreductase	Rv0197	branch_(48, 13)
s950	233358	silent	a->c		oxidoreductase	Rv0197	branch_(9, 8)
s951	233364	missense	g->c	R->S	oxidoreductase	Rv0197	branch_(9, 8)
s952	233377	missense	c->t	H->Y	oxidoreductase	Rv0197	branch_(59, 58)
s953	233469	missense	g->c	R->S	oxidoreductase	Rv0197	branch_(73, 71)
s954	233920	missense	c->t	R->C	oxidoreductase	Rv0197	branch_(67, 12)
s955	233979	silent	c->t		oxidoreductase	Rv0197	branch_(3, 0)
s956	234051	silent	g->a		oxidoreductase	Rv0197	branch_(35, 26)
s957	234105	silent	c->t		oxidoreductase	Rv0197	branch_(80, 70)
s958	234268	missense	g->t	V->F	oxidoreductase	Rv0197	branch_(74, 70)
s959	234407	missense	c->a	A->D	oxidoreductase	Rv0197	branch_(38, 37)
s960	234806	silent	g->a		zinc metalloprotease	Rv0198c	branch_(67, 12)
s961	234970	missense	a->g	V->A	zinc metalloprotease	Rv0198c	branch_(81, 58)
s962	235135	missense	c->t	G->E	zinc metalloprotease	Rv0198c	branch_(38, 37)
s963	235681	missense	g->a	A->V	zinc metalloprotease	Rv0198c	branch_(77, 69)
s964	235684	missense	c->g	W->S	zinc metalloprotease	Rv0198c	branch_(66, 63)
s965	235838	missense	g->c	L->V	zinc metalloprotease	Rv0198c	branch_(74, 70)
s966	235896	silent	c->t		zinc metalloprotease	Rv0198c	branch_(72, 71)
s967	236512	missense	c->t	GA->DV	zinc metalloprotease	Rv0198c	branch_(77, 69)
s968	237031	missense	c->t	P->L	hypothetical protein	Rv0199	branch_(82, 8)
s969	237215	missense	g->c	A->P	transmembrane protein	Rv0200	branch_(82, 8)
s970	237709	silent	c->t		transmembrane protein	Rv0200	branch_(41, 22)
s971	237762	missense	c->t	A->V	transmembrane protein	Rv0200	branch_(82, 8)
s972	237788	missense	a->c	I->L	transmembrane protein	Rv0200	branch_(73, 71)
s973	238575	silent	c->t		transmembrane transport protein MmpL11	Rv0202c	branch_(50, 38)
s974	239059	missense	c->t	R->Q	transmembrane transport protein MmpL11	Rv0202c	branch_(33, 27)
s975	239115	silent	g->a		transmembrane transport protein MmpL11	Rv0202c	branch_(39, 14)
s976	239733	missense	g->t	F->L	transmembrane transport protein MmpL11	Rv0202c	branch_(48, 13)
s977	240158	missense	c->t	V->M	transmembrane transport protein MmpL11	Rv0202c	branch_(49, 22)
s978	240507	silent	a->g		transmembrane transport protein MmpL11	Rv0202c	branch_(75, 74)
s979	240654	silent	c->t		transmembrane transport protein MmpL11	Rv0202c	branch_(68, 12)
s980	241465	missense	g->a	A->V	transmembrane transport protein MmpL11	Rv0202c	branch_(78, 77)
s981	241776	silent	a->c		transmembrane transport protein MmpL11	Rv0203	branch_(3, 0)
s982	241784	missense	t->c	N->D	transmembrane transport protein MmpL11	Rv0203	branch_(78, 77)
s983	242138	silent	g->a		transmembrane protein	Rv0204c	branch_(60, 59)
s984	242954	silent	c->t		transmembrane protein	Rv0204c	branch_(67, 12)
s985	243535	missense	c->t	A->V	transmembrane protein	Rv0205	branch_(36, 25)
s986	243538	missense	t->c	L->P	transmembrane protein	Rv0205	branch_(80, 70)
s987	243598	missense	a->g	H->R	transmembrane protein	Rv0205	branch_(9, 8)
s988	244393	missense	t->c	V->A	transmembrane protein	Rv0205	branch_(5, 3)
s989	244550	silent	a->g		transmembrane transport protein MmpL3	Rv0206c	branch_(69, 7)
s990	244600	missense	c->t	E->K	transmembrane transport protein MmpL3	Rv0206c	branch_(49, 22)
s991	244643	silent	g->a		transmembrane transport protein MmpL3	Rv0206c	branch_(34, 15)
s992	245438	silent	g->a		transmembrane transport protein MmpL3	Rv0206c	branch_(47, 38)
s993	245921	missense	g->c	D->E	transmembrane transport protein MmpL3	Rv0206c	branch_(6, 5)
s994	246144	missense	a->g	V->A	transmembrane transport protein MmpL3	Rv0206c	branch_(82, 8)
s995	246169	missense	a->t	F->I	transmembrane transport protein MmpL3	Rv0206c	branch_(6, 5)
s996	246359	silent	c->t		transmembrane transport protein MmpL3	Rv0206c	branch_(82, 8)
s997	246641	silent	g->a		transmembrane transport protein MmpL3	Rv0206c	branch_(48, 13)
s998	247732	missense	t->g	K->N	hypothetical protein	Rv0207c	branch_(82, 8)
s999	248342	missense	c->t	V->M	tRNA (guanine-N(7)-)-methyltransferase	Rv0208c	branch_(75, 74)
s1000	248523	silent	g->a		tRNA (guanine-N(7)-)-methyltransferase	Rv0208c	branch_(35, 26)
s1001	248946	silent	c->t		tRNA (guanine-N(7)-)-methyltransferase	Rv0208c	branch_(59, 58)
s1002	250454	missense	a->g	K->R	hypothetical protein	Rv0210	branch_(82, 8)
s1003	250773	silent	g->a		hypothetical protein	Rv0210	branch_(73, 71)
s1004	250952	missense	g->a	R->Q	hypothetical protein	Rv0210	branch_(71, 70)
s1005	251176	missense	c->a	L->M	hypothetical protein	Rv0210	branch_(59, 58)
s1006	251224	missense	g->a	G->S	hypothetical protein	Rv0210	branch_(80, 70)
s1007	251468	missense	g->t	R->L	hypothetical protein	Rv0210	branch_(51, 24)
s1008	251575	missense	g->a	A->T	hypothetical protein	Rv0210	branch_(19, 9)
s1009	251669	intergenic	t->c			IG-Rv0210-Rv0211	branch_(9, 8)
s1010	252105	missense	g->a	M->I	phosphoenolpyruvate carboxykinase	Rv0211	branch_(49, 22)
s1011	252900	silent	c->t		phosphoenolpyruvate carboxykinase	Rv0211	branch_(48, 13)
s1012	253032	silent	c->t		phosphoenolpyruvate carboxykinase	Rv0211	branch_(3, 0)
s1013	253046	missense	a->c	K->T	phosphoenolpyruvate carboxykinase	Rv0211	branch_(58, 6)
s1014	253388	missense	c->g	A->G	phosphoenolpyruvate carboxykinase	Rv0211	branch_(35, 26)
s1015	254012	missense	g->a	A->V	transcriptional regulatory protein NadR	Rv0212c	branch_(51, 24)
s1016	254149	silent	c->t		transcriptional regulatory protein NadR	Rv0212c	branch_(80, 70)
s1017	254508	missense	c->g	G->R	transcriptional regulatory protein NadR	Rv0212c	branch_(37, 5)
s1018	254570	missense	g->a	A->V	transcriptional regulatory protein NadR	Rv0212c	branch_(76, 74)
s1019	254676	missense	c->a	E->D	methyltransferase (methylase)	Rv0213c	branch_(82, 8)
s1020	254903	missense	c->a	G->C	methyltransferase (methylase)	Rv0213c	branch_(69, 7)
s1021	255200	missense	c->t	V->I	methyltransferase (methylase)	Rv0213c	branch_(82, 8)
s1022	255373	missense	t->c	D->G	methyltransferase (methylase)	Rv0213c	branch_(62, 10)
s1023	255401	missense	c->a	G->W	methyltransferase (methylase)	Rv0213c	branch_(47, 38)
s1024	255950	missense	t->g	M->L	methyltransferase (methylase)	Rv0213c	branch_(82, 8)
s1025	256001	missense	g->t	L->I	methyltransferase (methylase)	Rv0213c	branch_(59, 58)
s1026	256146	missense	c->t	T->M	long-chain-fatty-acid--CoA ligase	Rv0214	branch_(79, 77)
s1027	256182	missense	g->c	G->A	long-chain-fatty-acid--CoA ligase	Rv0214	branch_(7, 6)
s1028	256640	missense	t->g	S->A	long-chain-fatty-acid--CoA ligase	Rv0214	branch_(41, 22)
s1029	256830	missense	c->t	T->I	long-chain-fatty-acid--CoA ligase	Rv0214	branch_(40, 24)
s1030	257071	silent	c->t		long-chain-fatty-acid--CoA ligase	Rv0214	branch_(62, 10)
s1031	257093	missense	t->c	S->P	long-chain-fatty-acid--CoA ligase	Rv0214	branch_(34, 15)
s1032	257553	missense	c->t	A->V	long-chain-fatty-acid--CoA ligase	Rv0214	branch_(48, 13)
s1033	257982	missense	t->g	D->A	acyl-CoA dehydrogenase FADE3	Rv0215c	branch_(41, 22)
s1034	257987	silent	c->t		acyl-CoA dehydrogenase FADE3	Rv0215c	branch_(79, 77)
s1035	258060	missense	g->a	S->L	acyl-CoA dehydrogenase FADE3	Rv0215c	branch_(78, 77)
s1036	258128	silent	t->g		acyl-CoA dehydrogenase FADE3	Rv0215c	branch_(3, 0)
s1037	258470	silent	a->g		acyl-CoA dehydrogenase FADE3	Rv0215c	branch_(58, 6)
s1038	258561	missense	a->c	L->R	acyl-CoA dehydrogenase FADE3	Rv0215c	branch_(58, 6)
s1039	258902	missense	c->a	MA->E	hypothetical protein	Rv0215c	branch_(7, 6)
s1040	259287	silent	g->c		hypothetical protein	Rv0216	branch_(73, 71)
s1041	259596	silent	g->a		hypothetical protein	Rv0216	branch_(75, 74)
s1042	259689	silent	g->a		hypothetical protein	Rv0216	branch_(72, 71)
s1043	260610	silent	c->t		esterase LipW	Rv0217c	branch_(43, 37)
s1044	260836	missense	c->g	G->A	esterase LipW	Rv0217c	branch_(81, 58)
s1045	261235	silent	g->a		transmembrane protein	Rv0218	branch_(51, 24)
s1046	261566	missense	g->a	E->K	transmembrane protein	Rv0218	branch_(46, 44)
s1047	261622	silent	g->c		transmembrane protein	Rv0218	branch_(67, 12)
s1048	261650	missense	a->g	T->A	transmembrane protein	Rv0218	branch_(39, 14)
s1049	262160	missense	g->a	DW->N	transmembrane protein	Rv0218	branch_(5, 3)
s1050	262207	missense	g->t	VC->VF	transmembrane protein	Rv0218	branch_(67, 12)
s1051	262268	silent	a->t		transmembrane protein	Rv0219	branch_(10, 9)
s1052	262428	missense	g->a	V->I	transmembrane protein	Rv0219	branch_(80, 70)
s1053	262829	silent	c->t		esterase LipC	Rv0220	branch_(48, 13)
s1054	262957	missense	g->a	G->D	esterase LipC	Rv0220	branch_(50, 38)
s1055	263057	silent	t->g		esterase LipC	Rv0220	branch_(77, 69)
s1056	263195	silent	c->t		esterase LipC	Rv0220	branch_(51, 24)
s1057	263488	missense	g->a	G->D	esterase LipC	Rv0220	branch_(73, 71)
s1058	263617	missense	c->t	A->V	esterase LipC	Rv0220	branch_(50, 38)
s1059	264021	missense	t->c	*->Q	esterase LipC	Rv0220	branch_(3, 0)
s1060	264129	missense	g->a	M->I	hypothetical protein	Rv0221	branch_(11, 10)
s1061	264298	missense	c->a	Q->K	hypothetical protein	Rv0221	branch_(69, 7)
s1062	266859	silent	g->a		aldehyde dehydrogenase	Rv0223c	branch_(4, 3)
s1063	267329	missense	g->a	P->S	aldehyde dehydrogenase	Rv0223c	branch_(5, 3)
s1064	267751	missense	g->c	A->G	aldehyde dehydrogenase	Rv0223c	branch_(13, 11)
s1065	268277	missense	g->c	F->L	methyltransferase (methylase)	Rv0224c	branch_(5, 3)
s1066	268480	silent	g->a		methyltransferase (methylase)	Rv0224c	branch_(42, 23)
s1067	269888	silent	c->t		transmembrane protein	Rv0226c	branch_(81, 58)
s1068	270430	missense	g->c	P->A	transmembrane protein	Rv0226c	branch_(13, 11)
s1069	270889	missense	c->a	A->S	transmembrane protein	Rv0226c	branch_(64, 62)
s1070	271042	missense	c->t	A->T	transmembrane protein	Rv0226c	branch_(47, 38)
s1071	271357	missense	c->a	V->F	transmembrane protein	Rv0226c	branch_(82, 8)
s1072	271553	intergenic	g->a			IG-Rv0226c-Rv0227c	branch_(18, 16)
s1073	272267	silent	a->g		hypothetical protein	Rv0227c	branch_(33, 27)
s1074	272306	silent	c->a		hypothetical protein	Rv0227c	branch_(37, 5)
s1075	272678	silent	c->t		hypothetical protein	Rv0227c	branch_(69, 7)
s1076	272684	silent	g->a		hypothetical protein	Rv0227c	branch_(18, 16)
s1077	272740	missense	t->c	I->V	hypothetical protein	Rv0227c	branch_(82, 8)
s1078	272753	missense	g->c	S->R	hypothetical protein	Rv0227c	branch_(5, 3)
s1079	272802	missense	c->t	G->E	hypothetical protein	Rv0227c	branch_(81, 58)
s1080	273558	silent	c->g		integral membrane acyltransferase	Rv0228	branch_(6, 5)
s1081	273568	missense	g->t	A->S	integral membrane acyltransferase	Rv0228	branch_(77, 69)
s1082	273581	missense	c->t	A->V	integral membrane acyltransferase	Rv0228	branch_(38, 37)
s1083	274396	silent	g->a		hypothetical protein	Rv0229c	branch_(60, 59)
s1084	274463	missense	c->a	R->L	hypothetical protein	Rv0229c	branch_(62, 10)
s1085	274584	missense	a->g	S->P	hypothetical protein	Rv0229c	branch_(59, 58)
s1086	274930	silent	g->a		hypothetical protein	Rv4006	branch_(40, 24)
s1087	275194	missense	t->g	RD->RA	hypothetical protein	Rv0230c	branch_(82, 8)
s1088	275203	missense	c->t	RG->RD	hypothetical protein	Rv0230c	branch_(67, 12)
s1089	275367	missense	g->t	D->E	phosphotriesterase	Rv0230c	branch_(6, 5)
s1090	275381	missense	c->t	E->K	phosphotriesterase	Rv0230c	branch_(44, 43)
s1091	275634	silent	g->a		phosphotriesterase	Rv0230c	branch_(33, 27)
s1092	275691	silent	g->a		phosphotriesterase	Rv0230c	branch_(49, 22)
s1093	275859	missense	g->t	N->KY	phosphotriesterase	Rv0230c	branch_(41, 22)
s1094	276363	silent	c->t		acyl-CoA dehydrogenase FADE4	Rv0231	branch_(44, 43)
s1095	276539	missense	g->c	G->A	acyl-CoA dehydrogenase FADE4	Rv0231	branch_(62, 10)
s1096	276891	silent	c->t		acyl-CoA dehydrogenase FADE4	Rv0231	branch_(45, 44)
s1097	277022	missense	a->g	Y->C	acyl-CoA dehydrogenase FADE4	Rv0231	branch_(38, 37)
s1098	277416	silent	c->t		acyl-CoA dehydrogenase FADE4	Rv0231	branch_(80, 70)
s1099	277862	intergenic	g->t			IG-Rv0231-Rv0232	branch_(5, 3)
s1100	277865	intergenic	g->c			IG-Rv0231-Rv0232	branch_(58, 6)
s1101	277885	intergenic	c->g			IG-Rv0231-Rv0232	branch_(51, 24)
s1102	278018	silent	g->a		TetR/ACRR family transcriptional regulator	Rv0232	branch_(73, 71)
s1103	278021	silent	t->c		TetR/ACRR family transcriptional regulator	Rv0232	branch_(13, 11)
s1104	278119	missense	a->c	Y->S	TetR/ACRR family transcriptional regulator	Rv0232	branch_(81, 58)
s1105	278189	silent	t->c		TetR/ACRR family transcriptional regulator	Rv0232	branch_(71, 70)
s1106	278312	silent	c->t		TetR/ACRR family transcriptional regulator	Rv0232	branch_(76, 74)
s1107	278681	missense	c->g	H->D	ribonucleotide-diphosphate reductase subunit beta	Rv0233	branch_(52, 21)
s1108	278755	silent	c->t		ribonucleotide-diphosphate reductase subunit beta	Rv0233	branch_(65, 63)
s1109	279516	missense	c->t	A->V	ribonucleotide-diphosphate reductase subunit beta	Rv0233	branch_(65, 63)
s1110	279517	missense	g->c	A->V	ribonucleotide-diphosphate reductase subunit beta	Rv0233	branch_(65, 63)
s1111	279589	intergenic	g->a			IG-Rv0233-Rv0234c	branch_(65, 63)
s1112	279590	intergenic	c->g			IG-Rv0233-Rv0234c	branch_(65, 63)
s1113	279617	silent	g->a		succinic semialdehyde dehydrogenase	Rv0234c	branch_(50, 38)
s1114	279803	silent	g->t		succinic semialdehyde dehydrogenase	Rv0234c	branch_(60, 59)
s1115	280294	missense	c->t	V->M	succinic semialdehyde dehydrogenase	Rv0234c	branch_(80, 70)
s1116	280519	missense	c->t	G->S	succinic semialdehyde dehydrogenase	Rv0234c	branch_(82, 8)
s1117	281208	silent	c->t		transmembrane protein	Rv0235c	branch_(70, 69)
s1118	281405	missense	g->t	P->T	transmembrane protein	Rv0235c	branch_(59, 58)
s1119	281454	silent	c->a		transmembrane protein	Rv0235c	branch_(77, 69)
s1120	282188	missense	g->a	R->C	transmembrane protein	Rv0235c	branch_(35, 26)
s1121	282533	missense	a->t	F->I	transmembrane protein	Rv0235c	branch_(38, 37)
s1122	282537	silent	g->t		transmembrane protein	Rv0235c	branch_(37, 5)
s1123	282604	missense	a->t	F->Y	transmembrane protein	Rv0235c	branch_(77, 69)
s1124	283093	silent	c->g		transmembrane protein	Rv0236c	branch_(46, 44)
s1125	283363	silent	g->a		transmembrane protein	Rv0236c	branch_(74, 70)
s1126	283436	missense	t->g	E->A	transmembrane protein	Rv0236c	branch_(82, 8)
s1127	284051	missense	t->g	K->T	transmembrane protein	Rv0236c	branch_(82, 8)
s1128	284561	missense	c->t	R->H	transmembrane protein	Rv0236c	branch_(67, 12)
s1129	285096	silent	g->t		transmembrane protein	Rv0236c	branch_(80, 70)
s1130	286579	silent	c->t		transmembrane protein	Rv0236c	branch_(48, 13)
s1131	286580	missense	a->t	L->Q	transmembrane protein	Rv0236c	branch_(80, 70)
s1132	287068	missense	t->c	N->D	hypothetical protein	Rv0236A	branch_(57, 43)
s1133	287747	missense	a->c	RT->RP	lipoprotein LpqI	Rv0237	branch_(48, 13)
s1134	287904	missense	t->c	DV->GA	lipoprotein LpqI	Rv0237	branch_(36, 25)
s1135	287933	missense	g->t	AG->AC	lipoprotein LpqI	Rv0237	branch_(48, 13)
s1136	288245	missense	c->t	R->C	lipoprotein LpqI	Rv0237	branch_(57, 43)
s1137	288260	silent	c->t		lipoprotein LpqI	Rv0237	branch_(16, 15)
s1138	288386	missense	g->t	G->W	TetR family transcriptional regulator	Rv0237	branch_(73, 71)
s1139	288715	silent	c->t		TetR family transcriptional regulator	Rv0238	branch_(64, 62)
s1140	288799	silent	g->a		TetR family transcriptional regulator	Rv0238	branch_(67, 12)
s1141	288952	silent	c->t		TetR family transcriptional regulator	Rv0238	branch_(4, 3)
s1142	289253	intergenic	c->t			IG-Rv0239-Rv0240	branch_(62, 10)
s1143	289300	intergenic	c->t			IG-Rv0239-Rv0240	branch_(71, 70)
s1144	289435	missense	g->t	A->S	hypothetical protein	Rv0240	branch_(7, 6)
s1145	289494	silent	g->a		hypothetical protein	Rv0240	branch_(60, 59)
s1146	290226	silent	c->t		hypothetical protein	Rv0241c	branch_(72, 71)
s1147	290374	missense	t->c	H->R	hypothetical protein	Rv0241c	branch_(69, 7)
s1148	290425	missense	g->t	T->N	hypothetical protein	Rv0241c	branch_(80, 70)
s1149	290454	silent	c->t		hypothetical protein	Rv0241c	branch_(4, 3)
s1150	290941	silent	g->a		3-ketoacyl-ACP reductase	Rv0242c	branch_(80, 70)
s1151	291830	missense	t->g	D->A	3-ketoacyl-ACP reductase	Rv0242c	branch_(58, 6)
s1152	291855	missense	g->a	P->S	3-ketoacyl-ACP reductase	Rv0242c	branch_(81, 58)
s1153	291977	missense	g->a	P->L	3-ketoacyl-ACP reductase	Rv0242c	branch_(78, 77)
s1154	292210	intergenic	c->g			IG-Rv0243-Rv0244c	branch_(67, 12)
s1155	292830	missense	c->g	F->L	acetyl-CoA acetyltransferase	Rv0243	branch_(67, 12)
s1156	293079	silent	g->a		acetyl-CoA acetyltransferase	Rv0243	branch_(66, 63)
s1157	294012	missense	t->g	D->A	acyl-CoA dehydrogenase FADE5	Rv0244c	branch_(28, 27)
s1158	294127	missense	c->t	D->N	acyl-CoA dehydrogenase FADE5	Rv0244c	branch_(3, 0)
s1159	294170	silent	g->a		acyl-CoA dehydrogenase FADE5	Rv0244c	branch_(77, 69)
s1160	294198	missense	t->g	E->A	acyl-CoA dehydrogenase FADE5	Rv0244c	branch_(5, 3)
s1161	294453	missense	t->c	K->R	acyl-CoA dehydrogenase FADE5	Rv0244c	branch_(5, 3)
s1162	294514	missense	t->c	T->A	acyl-CoA dehydrogenase FADE5	Rv0244c	branch_(65, 63)
s1163	294596	silent	t->g		acyl-CoA dehydrogenase FADE5	Rv0244c	branch_(48, 13)
s1164	294648	missense	c->t	G->D	acyl-CoA dehydrogenase FADE5	Rv0244c	branch_(68, 12)
s1165	294775	missense	g->a	H->Y	acyl-CoA dehydrogenase FADE5	Rv0244c	branch_(44, 43)
s1166	294841	missense	c->g	A->P	acyl-CoA dehydrogenase FADE5	Rv0244c	branch_(33, 27)
s1167	294872	silent	g->a		acyl-CoA dehydrogenase FADE5	Rv0244c	branch_(50, 38)
s1168	295518	missense	c->t	R->H	acyl-CoA dehydrogenase FADE5	Rv0244c	branch_(67, 12)
s1169	295645	missense	c->t	G->R	acyl-CoA dehydrogenase FADE5	Rv0244c	branch_(58, 6)
s1170	295667	silent	g->a		acyl-CoA dehydrogenase FADE5	Rv0244c	branch_(34, 15)
s1171	295724	intergenic	a->g			IG-Rv0244c-Rv0245	branch_(41, 22)
s1172	295855	intergenic	a->c			IG-Rv0244c-Rv0245	branch_(5, 3)
s1173	295917	intergenic	c->t			IG-Rv0244c-Rv0245	branch_(36, 25)
s1174	296001	intergenic	t->g			IG-Rv0244c-Rv0245	branch_(39, 14)
s1175	296312	missense	c->t	S->F	oxidoreductase	Rv0245	branch_(16, 15)
s1176	296717	intergenic	c->g			IG-Rv0245-Rv0246	branch_(65, 63)
s1177	296790	silent	t->g		integral membrane protein	Rv0245	branch_(39, 14)	branch_(42, 23)
s1178	296793	silent	c->t		integral membrane protein	Rv0245	branch_(81, 58)
s1179	297194	missense	c->t	A->V	integral membrane protein	Rv0246	branch_(4, 3)
s1180	297396	silent	g->a		integral membrane protein	Rv0246	branch_(78, 77)
s1181	298713	silent	g->a		fumarate reductase iron-sulfur subunit	Rv0247c	branch_(82, 8)
s1182	299040	silent	g->a		succinate dehydrogenase flavoprotein subunit	Rv0248c	branch_(67, 12)
s1183	299811	silent	t->g		succinate dehydrogenase flavoprotein subunit	Rv0248c	branch_(67, 12)
s1184	300005	missense	c->t	G->S	succinate dehydrogenase flavoprotein subunit	Rv0248c	branch_(81, 58)
s1185	300111	silent	c->g		succinate dehydrogenase flavoprotein subunit	Rv0248c	branch_(68, 12)
s1186	300960	missense	c->g	Q->H	succinate dehydrogenase membrane anchor subunit	Rv0249c	branch_(50, 38)
s1187	301341	silent	c->a		succinate dehydrogenase membrane anchor subunit	Rv0249c	branch_(62, 10)
s1188	301535	missense	c->t	G->S	succinate dehydrogenase membrane anchor subunit	Rv0249c	branch_(66, 63)
s1189	301687	intergenic	c->t			IG-Rv0249c-Rv0250c	branch_(6, 5)
s1190	301844	missense	c->t	R->Q	hypothetical protein	Rv0250c	branch_(81, 58)
s1191	302258	missense	t->g	D->A	heat shock protein hsp (heat-stress-induced ribosome-binding protein A)	Rv0251c	branch_(44, 43)
s1192	302660	intergenic	t->c			IG-Rv0251c-Rv0252	branch_(36, 25)
s1193	302691	intergenic	c->a			IG-Rv0251c-Rv0252	branch_(28, 27)
s1194	302889	silent	c->a		nitrite reductase large subunit	Rv0252	branch_(82, 8)
s1195	303039	silent	c->t		nitrite reductase large subunit	Rv0252	branch_(7, 6)
s1196	303414	silent	c->t		nitrite reductase large subunit	Rv0252	branch_(77, 69)
s1197	303983	missense	g->a	R->H	nitrite reductase large subunit	Rv0252	branch_(82, 8)
s1198	304215	silent	c->t		nitrite reductase large subunit	Rv0252	branch_(35, 26)
s1199	304679	missense	g->t	G->V	nitrite reductase large subunit	Rv0252	branch_(51, 24)
s1200	304923	silent	a->g		nitrite reductase large subunit	Rv0252	branch_(20, 19)
s1201	305188	missense	g->t	V->L	nitrite reductase large subunit	Rv0252	branch_(13, 11)
s1202	305824	intergenic	c->g			IG-Rv0253-Rv0254c	branch_(38, 37)
s1203	306201	missense	t->c	H->R	bifunctional cobinamide kinase/cobinamide phosphate guanylyltransferase	Rv0254c	branch_(58, 6)
s1204	306367	intergenic	g->c			IG-Rv0254c-Rv0255c	branch_(67, 12)
s1205	308061	missense	c->t	G->D	PPE family protein	Rv0256c	branch_(68, 12)
s1206	308096	silent	g->t		PPE family protein	Rv0256c	branch_(47, 38)
s1207	308121	missense	c->t	R->Q	PPE family protein	Rv0256c	branch_(72, 71)
s1208	308594	silent	c->t		PPE family protein	Rv0256c	branch_(46, 44)
s1209	308661	missense	a->g	L->P	PPE family protein	Rv0256c	branch_(62, 10)
s1210	309129	missense	t->c	E->G	PPE family protein	Rv0256c	branch_(59, 58)
s1211	309681	intergenic	c->g			IG-Rv0256c-Rv0257	branch_(59, 58)
s1212	309737	silent	t->a		hypothetical protein	Rv0257	branch_(47, 38)
s1213	309756	silent	c->t		hypothetical protein	Rv0257	branch_(71, 70)
s1214	309765	silent	c->t			Rv0257	branch_(9, 8)
s1215	309847	missense	a->g	N->S	hypothetical protein	Rv0257	branch_(68, 12)
s1216	309875	silent	c->t		hypothetical protein	Rv0257	branch_(75, 74)
s1217	310129	intergenic	t->c			IG-Rv0257-Rv0258c	branch_(37, 5)
s1218	310132	intergenic	g->a			IG-Rv0257-Rv0258c	branch_(37, 5)
s1219	310973	missense	g->a	A->V	hypothetical protein	Rv0259c	branch_(52, 21)
s1220	311167	silent	t->c		hypothetical protein	Rv0259c	branch_(71, 70)
s1221	311338	silent	c->g		hypothetical protein	Rv0259c	branch_(28, 27)
s1222	311380	silent	g->c		hypothetical protein	Rv0259c	branch_(57, 43)
s1223	311613	silent	g->t		bifunctional uroporphyrinogen-III synthetase/response regulator domain protein	Rv0260c	branch_(52, 21)
s1224	312060	silent	t->g		bifunctional uroporphyrinogen-III synthetase/response regulator domain protein	Rv0260c	branch_(41, 22)
s1225	312138	silent	c->a		bifunctional uroporphyrinogen-III synthetase/response regulator domain protein	Rv0260c	branch_(71, 70)
s1226	312287	missense	a->g	S->P	bifunctional uroporphyrinogen-III synthetase/response regulator domain protein	Rv0260c	branch_(45, 44)
s1227	312649	missense	g->t	A->E	bifunctional uroporphyrinogen-III synthetase/response regulator domain protein	Rv0260c	branch_(39, 14)
s1228	312851	silent	g->a		integral membrane nitrite extrusion protein NarK3	Rv0261c	branch_(5, 3)
s1229	312856	missense	g->a	S->L	integral membrane nitrite extrusion protein NarK3	Rv0261c	branch_(82, 8)
s1230	312916	missense	a->g	L->P	integral membrane nitrite extrusion protein NarK3	Rv0261c	branch_(36, 25)
s1231	313086	silent	c->t		integral membrane nitrite extrusion protein NarK3	Rv0261c	branch_(3, 0)
s1232	313121	missense	g->t	L->M	integral membrane nitrite extrusion protein NarK3	Rv0261c	branch_(46, 44)
s1233	313425	silent	g->t		integral membrane nitrite extrusion protein NarK3	Rv0261c	branch_(71, 70)
s1234	313869	silent	g->a		integral membrane nitrite extrusion protein NarK3	Rv0261c	branch_(5, 3)
s1235	314260	intergenic	c->g			IG-Rv0261c-Rv0262c	branch_(47, 38)
s1236	314429	silent	t->c		aminoglycoside 2''''-N-acetyltransferase AAC (AAC(2'''')-IC)	Rv0262c	branch_(39, 14)
s1237	314488	missense	g->c	R->G	aminoglycoside 2''''-N-acetyltransferase AAC (AAC(2'''')-IC)	Rv0262c	branch_(66, 63)
s1238	314799	missense	t->g	E->A	aminoglycoside 2''''-N-acetyltransferase AAC (AAC(2'''')-IC)	Rv0262c	branch_(81, 58)
s1239	314850	intergenic	t->g			IG-Rv0262c-Rv0263c	branch_(66, 63)
s1240	314878	missense	t->c	T->A	hypothetical protein	Rv0263c	branch_(67, 12)
s1241	315069	missense	c->a	R->L	hypothetical protein	Rv0263c	branch_(37, 5)
s1242	315257	silent	g->t		hypothetical protein	Rv0263c	branch_(80, 70)
s1243	315502	missense	c->a	V->F	hypothetical protein	Rv0263c	branch_(51, 24)
s1244	315595	missense	t->g	T->P	hypothetical protein	Rv0263c	branch_(45, 44)
s1245	316129	missense	c->g	G->A	hypothetical protein	Rv0264c	branch_(25, 20)
s1246	316566	missense	t->c	Y->C	periplasmic IRON-transport lipoprotein	Rv0265c	branch_(3, 0)
s1247	316591	missense	t->c	I->V	periplasmic IRON-transport lipoprotein	Rv0265c	branch_(73, 71)
s1248	316684	missense	c->t	E->K	periplasmic IRON-transport lipoprotein	Rv0265c	branch_(40, 24)
s1249	316886	silent	c->t		periplasmic IRON-transport lipoprotein	Rv0265c	branch_(49, 22)
s1250	317001	missense	c->t	G->D	periplasmic IRON-transport lipoprotein	Rv0265c	branch_(48, 13)
s1251	317045	silent	g->a		periplasmic IRON-transport lipoprotein	Rv0265c	branch_(80, 70)
s1252	317940	missense	c->g	G->A	5-oxoprolinase	Rv0266c	branch_(72, 71)
s1253	318068	silent	c->t		5-oxoprolinase	Rv0266c	branch_(3, 0)
s1254	318122	missense	c->t	M->I	5-oxoprolinase	Rv0266c	branch_(73, 71)
s1255	318340	missense	c->t	A->T	5-oxoprolinase	Rv0266c	branch_(81, 58)
s1256	318386	silent	g->t		5-oxoprolinase	Rv0266c	branch_(67, 12)
s1257	319058	silent	c->t		5-oxoprolinase	Rv0266c	branch_(81, 58)
s1258	319600	missense	g->a	R->C	5-oxoprolinase	Rv0266c	branch_(40, 24)
s1259	319625	silent	a->g		5-oxoprolinase	Rv0266c	branch_(61, 59)
s1260	320502	missense	c->t	R->Q	5-oxoprolinase	Rv0266c	branch_(51, 24)
s1261	321403	missense	g->a	D->N	integral membrane nitrite extrusion protein NarU	Rv0267	branch_(80, 70)
s1262	322684	silent	c->t		integral membrane nitrite extrusion protein NarU	Rv0267	branch_(4, 3)
s1263	323032	missense	c->a	G->V	hypothetical protein	Rv0268c	branch_(38, 37)
s1264	323306	intergenic	a->g			IG-Rv0268c-Rv0269c	branch_(6, 5)
s1265	323335	intergenic	c->t			IG-Rv0268c-Rv0269c	branch_(51, 24)
s1266	323974	silent	g->a		hypothetical protein	Rv0269c	branch_(74, 70)
s1267	324588	missense	c->t	P->S	acyl-CoA synthetase	Rv0270	branch_(75, 74)
s1268	324809	missense	c->g	I->M	acyl-CoA synthetase	Rv0270	branch_(68, 12)
s1269	324812	silent	c->t		acyl-CoA synthetase	Rv0270	branch_(62, 10)
s1270	324902	missense	c->g	D->E	acyl-CoA synthetase	Rv0270	branch_(3, 0)
s1271	325038	missense	g->a	G->N	acyl-CoA synthetase	Rv0270	branch_(22, 21)
s1272	325039	missense	g->a	G->N	acyl-CoA synthetase	Rv0270	branch_(22, 21)
s1273	325505	silent	t->c		acyl-CoA synthetase	Rv0270	branch_(19, 9)
s1274	325766	silent	g->a		acyl-CoA synthetase	Rv0270	branch_(65, 63)
s1275	326002	missense	a->g	D->G	acyl-CoA synthetase	Rv0270	branch_(69, 7)
s1276	326039	silent	c->t		acyl-CoA synthetase	Rv0270	branch_(36, 25)
s1277	326322	missense	c->t	E->K	acyl-CoA dehydrogenase FADE6	Rv0271c	branch_(80, 70)
s1278	326483	missense	a->g	I->T	acyl-CoA dehydrogenase FADE6	Rv0271c	branch_(73, 71)
s1279	326566	silent	g->a		acyl-CoA dehydrogenase FADE6	Rv0271c	branch_(50, 38)
s1280	326930	missense	t->g	Q->P	acyl-CoA dehydrogenase FADE6	Rv0271c	branch_(72, 71)
s1281	327094	silent	g->c		acyl-CoA dehydrogenase FADE6	Rv0271c	branch_(40, 24)
s1282	327146	missense	g->a	T->M	acyl-CoA dehydrogenase FADE6	Rv0271c	branch_(64, 62)
s1283	327312	missense	t->c	K->E	acyl-CoA dehydrogenase FADE6	Rv0271c	branch_(43, 37)
s1284	327469	silent	c->t		acyl-CoA dehydrogenase FADE6	Rv0271c	branch_(64, 62)
s1285	327897	missense	c->t	V->I	acyl-CoA dehydrogenase FADE6	Rv0271c	branch_(27, 26)
s1286	328569	intergenic	g->c			IG-Rv0271c-Rv0272c	branch_(62, 10)
s1287	328641	silent	g->t		hypothetical protein	Rv0272c	branch_(51, 24)
s1288	328706	missense	t->c	I->V	hypothetical protein	Rv0272c	branch_(80, 70)
s1289	328819	missense	c->t	S->N	hypothetical protein	Rv0272c	branch_(64, 62)
s1290	329068	missense	t->c	Q->R	hypothetical protein	Rv0272c	branch_(45, 44)
s1291	329109	silent	c->t		hypothetical protein	Rv0272c	branch_(50, 38)
s1292	329203	missense	a->c	V->G	hypothetical protein	Rv0272c	branch_(34, 15)
s1293	329218	missense	g->a	P->L	hypothetical protein	Rv0272c	branch_(4, 3)
s1294	329826	missense	c->t	C->Y	transcriptional regulatory protein	Rv0273c	branch_(33, 27)
s1295	331042	missense	g->a	S->F	TetR family transcriptional regulator	Rv0275c	branch_(82, 8)
s1296	331309	missense	a->g	L->P	TetR family transcriptional regulator	Rv0275c	branch_(58, 6)
s1297	331588	missense	g->a	S->L	TetR family transcriptional regulator	Rv0275c	branch_(8, 7)
s1298	331633	missense	c->t	R->H	TetR family transcriptional regulator	Rv0275c	branch_(48, 13)
s1299	331635	silent	g->a		TetR family transcriptional regulator	Rv0275c	branch_(68, 12)
s1300	332131	missense	c->a	Y->*	hypothetical protein	Rv0276	branch_(35, 26)
s1301	332161	missense	g->c	W->C	hypothetical protein	Rv0276	branch_(47, 38)
s1302	332357	missense	a->g	I->V	hypothetical protein	Rv0276	branch_(41, 22)
s1303	332746	missense	g->a	R->W	hypothetical protein	Rv0277c	branch_(82, 8)
s1304	332759	silent	a->g		hypothetical protein	Rv0277c	branch_(36, 25)
s1305	332792	silent	g->t		hypothetical protein	Rv0277c	branch_(82, 8)
s1306	332889	missense	c->t	S->N	hypothetical protein	Rv0277c	branch_(82, 8)
s1307	332891	silent	t->c		hypothetical protein	Rv0277c	branch_(82, 8)
s1308	332904	missense	t->c	H->R	hypothetical protein	Rv0277c	branch_(61, 59)
s1309	332916	missense	t->g	N->T	hypothetical protein	Rv0277c	branch_(28, 27)
s1310	333044	silent	a->g		hypothetical protein	Rv0277c	branch_(39, 14)
s1311	333212	missense	g->c	T->R	hypothetical protein	Rv0277c	branch_(9, 8)
s1312	333217	silent	c->t		hypothetical protein	Rv0277c	branch_(47, 38)
s1313	333296	missense	g->t	A->D	hypothetical protein	Rv0277c	branch_(38, 37)
s1314	333348	silent	a->g		hypothetical protein	Rv0277c	branch_(3, 0)
s1315	333520	missense	t->c	T->A	PE-PGRS family protein	Rv0278c	branch_(3, 0)
s1316	336101	silent	c->t		PE-PGRS family protein	Rv0278c	branch_(81, 58)
s1317	339188	intergenic	c->t			IG-Rv0279c-Rv0280	branch_(40, 24)
s1318	339343	missense	t->c	S->P	PPE family protein	Rv0279c	branch_(1, 0)
s1319	340132	missense	g->a	E->K	PPE family protein	Rv0280	branch_(13, 11)	branch_(35, 26)	branch_(41, 22)	branch_(43, 37)	branch_(58, 6)	branch_(67, 12)	branch_(74, 70)
s1320	340213	missense	a->g	I->V	PPE family protein	Rv0280	branch_(45, 44)
s1321	340343	missense	c->t	P->L	PPE family protein	Rv0280	branch_(68, 12)
s1322	341082	missense	g->a	A->T	hypothetical protein	Rv0281	branch_(40, 24)
s1323	342146	missense	a->c	E->A	hypothetical protein	Rv0282	branch_(19, 9)
s1324	342873	silent	c->t		hypothetical protein	Rv0282	branch_(62, 10)
s1325	343281	silent	g->c		hypothetical protein	Rv0282	branch_(8, 7)
s1326	344258	silent	g->a		hypothetical protein	Rv0283	branch_(58, 6)
s1327	344288	silent	c->g		hypothetical protein	Rv0283	branch_(69, 7)
s1328	344329	missense	g->c	S->T	hypothetical protein	Rv0283	branch_(82, 8)
s1329	344952	missense	a->g	T->A	hypothetical protein	Rv0283	branch_(68, 12)
s1330	344957	missense	a->g	I->M	hypothetical protein	Rv0283	branch_(37, 5)
s1331	345068	silent	t->g		hypothetical protein	Rv0283	branch_(82, 8)
s1332	345070	missense	g->c	R->P	hypothetical protein	Rv0283	branch_(73, 71)
s1333	345317	silent	g->c		hypothetical protein	Rv0283	branch_(58, 6)
s1334	345594	missense	a->g	S->G	hypothetical protein	Rv0283	branch_(17, 16)
s1335	345700	silent	c->t		hypothetical protein	Rv0284	branch_(60, 59)
s1336	345719	missense	g->c	E->Q	hypothetical protein	Rv0284	branch_(82, 8)
s1337	346034	missense	a->g	T->A	hypothetical protein	Rv0284	branch_(3, 0)
s1338	346275	missense	c->g	P->R	hypothetical protein	Rv0284	branch_(52, 21)
s1339	346693	silent	g->t		hypothetical protein	Rv0284	branch_(48, 13)
s1340	347330	missense	g->a	V->I	hypothetical protein	Rv0284	branch_(57, 43)
s1341	347410	silent	a->c		hypothetical protein	Rv0284	branch_(60, 59)
s1342	347456	missense	c->a	P->T	hypothetical protein	Rv0284	branch_(82, 8)
s1343	347766	missense	c->t	A->V	hypothetical protein	Rv0284	branch_(35, 26)
s1344	347772	missense	c->t	A->V	hypothetical protein	Rv0284	branch_(49, 22)
s1345	348304	silent	c->t		hypothetical protein	Rv0284	branch_(33, 27)
s1346	349081	silent	g->a		hypothetical protein	Rv0284	branch_(82, 8)
s1347	350088	missense	c->a	L->M	PPE family protein	Rv0286	branch_(62, 10)
s1348	350489	silent	g->c		PPE family protein	Rv0286	branch_(8, 7)
s1349	351503	intergenic	a->g			IG-Rv0286-Rv0287	branch_(82, 8)
s1350	351875	missense	g->a	A->T	low molecular weight protein antigen 7 ESXH (10 kDa antigen) (CFP-7) (protein TB10.4)	Rv0288	branch_(78, 77)
s1351	351885	missense	g->a	G->D	low molecular weight protein antigen 7 ESXH (10 kDa antigen) (CFP-7) (protein TB10.4)	Rv0288	branch_(79, 77)
s1352	351917	missense	a->g	T->A	low molecular weight protein antigen 7 ESXH (10 kDa antigen) (CFP-7) (protein TB10.4)	Rv0288	branch_(81, 58)
s1353	351927	missense	g->a	S->N	low molecular weight protein antigen 7 ESXH (10 kDa antigen) (CFP-7) (protein TB10.4)	Rv0288	branch_(75, 74)
s1354	352058	missense	g->t	A->S	low molecular weight protein antigen 7 ESXH (10 kDa antigen) (CFP-7) (protein TB10.4)	Rv0288	branch_(37, 5)
s1355	352374	missense	g->a	V->M	hypothetical protein	Rv0289	branch_(38, 37)
s1356	352438	missense	c->t	A->V	hypothetical protein	Rv0289	branch_(17, 16)
s1357	352646	silent	g->a		hypothetical protein	Rv0289	branch_(58, 6)
s1358	352804	missense	g->c	R->P	hypothetical protein	Rv0289	branch_(80, 70)
s1359	352810	missense	g->a	G->D	hypothetical protein	Rv0289	branch_(57, 43)
s1360	353026	missense	a->c	Q->P	hypothetical protein	Rv0289	branch_(82, 8)
s1361	353197	missense	c->t	R->C	transmembrane protein	Rv0290	branch_(62, 10)
s1362	353309	missense	g->a	S->N	transmembrane protein	Rv0290	branch_(11, 10)
s1363	354280	missense	g->a	AR->TH	transmembrane protein	Rv0290	branch_(5, 3)
s1364	356160	missense	c->g	S->W	transmembrane protein	Rv0292	branch_(34, 15)
s1365	356528	missense	a->g	N->D	transmembrane protein	Rv0292	branch_(52, 21)
s1366	356529	missense	a->g	N->G	transmembrane protein	Rv0292	branch_(68, 12)
s1367	356791	silent	c->t		transmembrane protein	Rv0292	branch_(42, 23)
s1368	357131	missense	g->a	R->W	hypothetical protein	Rv0293c	branch_(67, 12)
s1369	357278	missense	c->t	G->S	hypothetical protein	Rv0293c	branch_(3, 0)
s1370	357538	missense	t->c	H->R	hypothetical protein	Rv0293c	branch_(59, 58)
s1371	357582	silent	g->a		hypothetical protein	Rv0293c	branch_(69, 7)
s1372	358251	silent	c->t		trans-aconitate 2-methyltransferase	Rv0294	branch_(44, 43)
s1373	358394	missense	a->g	D->G	trans-aconitate 2-methyltransferase	Rv0294	branch_(61, 59)
s1374	358473	missense	g->c	W->C	trans-aconitate 2-methyltransferase	Rv0294	branch_(62, 10)
s1375	358926	missense	a->c	E->D	trans-aconitate 2-methyltransferase	Rv0294	branch_(74, 70)
s1376	359745	missense	a->c	S->A	hypothetical protein	Rv0295c	branch_(45, 44)
s1377	360576	missense	g->a	Q->*	sulfatase	Rv0296c	branch_(79, 77)
s1378	360585	missense	c->t	E->K	sulfatase	Rv0296c	branch_(43, 37)
s1379	360809	missense	g->a	P->L	sulfatase	Rv0296c	branch_(68, 12)
s1380	361069	missense	g->c	H->Q	sulfatase	Rv0296c	branch_(51, 24)
s1381	361161	missense	t->c	T->A	sulfatase	Rv0296c	branch_(5, 3)
s1382	361236	missense	c->t	G->S	sulfatase	Rv0296c	branch_(39, 14)
s1383	361355	missense	c->t	GP->DRS	sulfatase	Rv0297	branch_(50, 38)
s1384	363076	missense	c->a	T->CT	Protein encoding sequence predicted by BioNumerics	Rv0297	branch_(67, 12)
s1385	363464	silent	g->a		hypothetical protein	Rv0298	branch_(13, 11)
s1386	363467	silent	g->a		hypothetical protein	Rv0298	branch_(65, 63)
s1387	363513	missense	g->a	S->N	hypothetical protein	Rv0299	branch_(4, 3)
s1388	363563	missense	g->a	A->T	hypothetical protein	Rv0299	branch_(62, 10)
s1389	363732	missense	c->t	AG->VG	hypothetical protein	Rv0299	branch_(75, 74)
s1390	363757	missense	c->t	VR->VC	hypothetical protein	Rv0299	branch_(4, 3)
s1391	363883	missense	a->g	I->V	hypothetical protein	Rv0300	branch_(72, 71)
s1392	364321	missense	g->a	R->H	hypothetical protein	Rv0301	branch_(46, 44)
s1393	364854	missense	c->g	H->D	TetR/ACRR family transcriptional regulator	Rv0302	branch_(15, 14)
s1394	364869	missense	c->a	Q->K	TetR/ACRR family transcriptional regulator	Rv0302	branch_(38, 37)
s1395	364975	missense	c->t	A->V	TetR/ACRR family transcriptional regulator	Rv0302	branch_(4, 3)
s1396	365358	missense	g->a	G->D	dehydrogenase/reductase	Rv0303	branch_(35, 26)
s1397	366247	missense	c->t	G->D	PPE family protein	Rv0304c	branch_(79, 77)
s1398	366299	missense	t->c	N->D	PPE family protein	Rv0304c	branch_(79, 77)
s1399	366639	silent	g->a		PPE family protein	Rv0304c	branch_(82, 8)
s1400	366710	missense	g->a	L->F	PPE family protein	Rv0304c	branch_(80, 70)
s1401	366711	silent	a->g		PPE family protein	Rv0304c	branch_(80, 70)
s1402	366716	missense	a->t	F->I	PPE family protein	Rv0304c	branch_(80, 70)
s1403	367182	silent	g->a		PPE family protein	Rv0304c	branch_(47, 38)
s1404	367471	missense	g->a	S->F	PPE family protein	Rv0304c	branch_(8, 7)
s1405	367478	missense	a->t	S->T	PPE family protein	Rv0304c	branch_(50, 38)
s1406	367492	missense	c->g	G->A	PPE family protein	Rv0304c	branch_(68, 12)
s1407	368077	missense	c->t	G->D	PPE family protein	Rv0304c	branch_(65, 63)
s1408	368087	missense	a->t	F->I	PPE family protein	Rv0304c	branch_(82, 8)
s1409	368092	missense	c->t	G->D	PPE family protein	Rv0304c	branch_(71, 70)
s1410	368168	missense	c->t	G->S	PPE family protein	Rv0304c	branch_(6, 5)
s1411	368353	missense	c->t	G->E	PPE family protein	Rv0304c	branch_(77, 69)
s1412	368397	silent	a->g		PPE family protein	Rv0304c	branch_(37, 5)
s1413	368453	missense	a->c	Y->D	PPE family protein	Rv0304c	branch_(40, 24)
s1414	368948	missense	t->c	I->V	PPE family protein	Rv0304c	branch_(69, 7)
s1415	369527	missense	t->g	N->H	PPE family protein	Rv0304c	branch_(82, 8)
s1416	369593	missense	c->t	D->N	PPE family protein	Rv0304c	branch_(48, 13)
s1417	369852	silent	g->a		PPE family protein	Rv0304c	branch_(47, 38)
s1418	369886	missense	c->g	G->A	PPE family protein	Rv0304c	branch_(62, 10)
s1419	370056	silent	g->a		PPE family protein	Rv0304c	branch_(74, 70)
s1420	370229	missense	c->t	G->R	PPE family protein	Rv0304c	branch_(80, 70)
s1421	370257	silent	g->c		PPE family protein	Rv0304c	branch_(48, 13)
s1422	370575	silent	c->t		PPE family protein	Rv0304c	branch_(78, 77)
s1423	370782	silent	g->t		PPE family protein	Rv0304c	branch_(72, 71)
s1424	370905	missense	g->a	N->D	PPE family protein	Rv0304c	branch_(36, 25)
s1425	370907	missense	t->c	N->D	PPE family protein	Rv0304c	branch_(36, 25)
s1426	370911	missense	c->g	L->F	PPE family protein	Rv0304c	branch_(36, 25)
s1427	370928	missense	c->t	V->I	PPE family protein	Rv0304c	branch_(36, 25)
s1428	371056	missense	c->t	G->D	PPE family protein	Rv0304c	branch_(50, 38)
s1429	371265	silent	c->t		PPE family protein	Rv0304c	branch_(36, 25)
s1430	371849	missense	c->t	A->T	PPE family protein	Rv0304c	branch_(48, 13)
s1431	371955	silent	g->a		PPE family protein	Rv0304c	branch_(33, 27)	branch_(68, 12)
s1432	372010	missense	a->g	V->A	PPE family protein	Rv0304c	branch_(75, 74)
s1433	372144	silent	g->a		PPE family protein	Rv0304c	branch_(3, 0)
s1434	372149	silent	g->a		PPE family protein	Rv0304c	branch_(9, 8)
s1435	372259	missense	c->t	S->N	PPE family protein	Rv0304c	branch_(40, 24)
s1436	372514	missense	a->g	F->S	PPE family protein	Rv0304c	branch_(57, 43)
s1437	372679	missense	g->t	T->N	PPE family protein	Rv0304c	branch_(82, 8)
s1438	372811	missense	c->t	G->D	PPE family protein	Rv0304c	branch_(49, 22)
s1439	372913	missense	a->c	VG->G	PPE family protein	Rv0305c	branch_(20, 19)
s1440	372987	missense	t->c	IT->MA	PPE family protein	Rv0305c	branch_(68, 12)
s1441	373034	missense	t->a	IY->F	PPE family protein	Rv0305c	branch_(80, 70)
s1442	373725	missense	c->a	A->S	PPE family protein	Rv0305c	branch_(48, 13)
s1443	374047	silent	g->a		PPE family protein	Rv0305c	branch_(50, 38)
s1444	374353	silent	a->g		PPE family protein	Rv0305c	branch_(15, 14)
s1445	374361	missense	c->g	G->R	PPE family protein	Rv0305c	branch_(66, 63)
s1446	374639	missense	c->t	G->D	PPE family protein	Rv0305c	branch_(80, 70)
s1447	375095	missense	c->g	G->A	PPE family protein	Rv0305c	branch_(77, 69)
s1448	376166	missense	c->t	R->W	oxidoreductase	Rv0306	branch_(81, 58)
s1449	376237	silent	g->a		oxidoreductase	Rv0306	branch_(58, 6)
s1450	376774	silent	t->c		hypothetical protein	Rv0307c	branch_(21, 20)
s1451	377014	silent	c->t		hypothetical protein	Rv0307c	branch_(16, 15)
s1452	377228	silent	g->a		integral membrane protein	Rv0308	branch_(45, 44)
s1453	377317	missense	g->a	V->I	integral membrane protein	Rv0308	branch_(57, 43)
s1454	377738	missense	c->t	S->L	integral membrane protein	Rv0308	branch_(75, 74)
s1455	378032	silent	g->a		hypothetical protein	Rv0309	branch_(43, 37)
s1456	378357	missense	t->g	S->A	hypothetical protein	Rv0309	branch_(69, 7)
s1457	378404	silent	g->a		hypothetical protein	Rv0309	branch_(43, 37)
s1458	378939	silent	g->c		hypothetical protein	Rv0310c	branch_(69, 7)
s1459	378971	missense	t->c	T->A	hypothetical protein	Rv0310c	branch_(68, 12)
s1460	379029	silent	g->a		hypothetical protein	Rv0310c	branch_(71, 70)
s1461	379417	silent	a->g		hypothetical protein	Rv0311	branch_(82, 8)
s1462	379528	missense	g->t	E->D	hypothetical protein	Rv0311	branch_(13, 11)
s1463	379687	silent	c->t		hypothetical protein	Rv0311	branch_(58, 6)
s1464	379707	missense	c->g	P->R	hypothetical protein	Rv0311	branch_(42, 23)
s1465	379724	missense	c->t	P->S	hypothetical protein	Rv0311	branch_(49, 22)
s1466	380234	missense	c->t	P->S	hypothetical protein	Rv0311	branch_(46, 44)
s1467	380772	missense	g->a	D->N	hypothetical protein	Rv0312	branch_(74, 70)
s1468	381030	missense	a->g	S->G	hypothetical protein	Rv0312	branch_(9, 8)
s1469	381053	silent	c->t		hypothetical protein	Rv0312	branch_(82, 8)
s1470	382243	missense	c->t	P->L	hypothetical protein	Rv0312	branch_(6, 5)
s1471	382356	missense	a->g	I->V	hypothetical protein	Rv0312	branch_(40, 24)
s1472	382489	intergenic	c->t			IG-Rv0312-Rv0313	branch_(6, 5)
s1473	382822	silent	g->a		hypothetical protein	Rv0313	branch_(78, 77)
s1474	382984	silent	g->a		hypothetical protein	Rv0314c	branch_(51, 24)
s1475	382991	missense	a->g	V->A	hypothetical protein	Rv0314c	branch_(5, 3)
s1476	384167	missense	t->c	HV->RA	hypothetical protein	Rv0315	branch_(39, 14)
s1477	384380	missense	a->c	LK->RT	hypothetical protein	Rv0315	branch_(52, 21)
s1478	385281	silent	g->a		glycerophosphoryl diester phosphodiesterase	Rv0317c	branch_(80, 70)
s1479	386013	intergenic	g->a			IG-Rv0317c-Rv0318c	branch_(42, 23)
s1480	386024	intergenic	g->a			IG-Rv0317c-Rv0318c	branch_(60, 59)
s1481	386060	intergenic	t->c			IG-Rv0317c-Rv0318c	branch_(5, 3)
s1482	386581	silent	g->c		integral membrane protein	Rv0318c	branch_(48, 13)
s1483	386626	silent	g->t		integral membrane protein	Rv0318c	branch_(38, 37)
s1484	386935	silent	c->t		integral membrane protein	Rv0318c	branch_(42, 23)
s1485	386956	silent	c->t		integral membrane protein	Rv0318c	branch_(82, 8)
s1486	387338	missense	t->c	Q->R	integral membrane protein	Rv0319	branch_(67, 12)
s1487	387353	missense	g->a	A->V	integral membrane protein	Rv0319	branch_(27, 26)
s1488	387829	intergenic	g->a			IG-Rv0319-Rv0320	branch_(80, 70)
s1489	388135	missense	t->c	F->S	hypothetical protein	Rv0320	branch_(80, 70)
s1490	389129	missense	a->g	Y->C	deoxycytidine triphosphate deaminase	Rv0321	branch_(5, 3)
s1491	389869	missense	c->t	Q->*	UDP-glucose 6-dehydrogenase UdgA	Rv0322	branch_(76, 74)
s1492	390828	missense	t->c	S->G	hypothetical protein	Rv0323c	branch_(56, 53)
s1493	391338	missense	a->g	W->R	hypothetical protein	Rv0323c	branch_(74, 70)
s1494	391853	missense	a->g	T->A	ArsR family transcriptional regulator	Rv0324	branch_(20, 19)
s1495	392261	silent	t->c		hypothetical protein	Rv0325	branch_(19, 9)
s1496	392329	intergenic	a->c			IG-Rv0326-Rv0327c	branch_(40, 24)
s1497	392330	intergenic	g->c			IG-Rv0326-Rv0327c	branch_(40, 24)
s1498	392479	missense	g->c	E->D	hypothetical protein	Rv0326	branch_(33, 27)
s1499	392506	silent	a->g		hypothetical protein	Rv0326	branch_(5, 3)
s1500	392914	missense	c->t	G->S	cytochrome P450 135A1	Rv0327c	branch_(36, 25)
s1501	393387	missense	c->t	R->H	cytochrome P450 135A1	Rv0327c	branch_(48, 13)
s1502	393748	missense	g->a	H->Y	cytochrome P450 135A1	Rv0327c	branch_(5, 3)
s1503	393784	missense	c->g	G->R	cytochrome P450 135A1	Rv0327c	branch_(46, 44)
s1504	393941	missense	c->t	M->I	cytochrome P450 135A1	Rv0327c	branch_(69, 7)
s1505	393965	missense	a->c	F->L	cytochrome P450 135A1	Rv0327c	branch_(81, 58)
s1506	394425	silent	g->a		TetR/AcrR family transcriptional regulator	Rv0328	branch_(39, 14)
s1507	394487	missense	g->a	G->E	TetR/AcrR family transcriptional regulator	Rv0328	branch_(66, 63)
s1508	394489	missense	t->c	Y->H	TetR/AcrR family transcriptional regulator	Rv0328	branch_(60, 59)
s1509	394803	missense	g->a	P->L	hypothetical protein	Rv0329c	branch_(71, 70)
s1510	394808	silent	c->t		hypothetical protein	Rv0329c	branch_(51, 24)
s1511	394900	missense	g->a	R->*	hypothetical protein	Rv0329c	branch_(43, 37)
s1512	394935	missense	c->g	W->S	hypothetical protein	Rv0329c	branch_(5, 3)
s1513	395020	missense	a->c	S->A	hypothetical protein	Rv0329c	branch_(82, 8)
s1514	395537	missense	a->c	I->S	hypothetical protein	Rv0330c	branch_(80, 70)
s1515	396112	missense	c->t	S->L	dehydrogenase/reductase	Rv0330c	branch_(72, 71)
s1516	396137	silent	c->g		dehydrogenase/reductase	Rv0330c	branch_(38, 37)
s1517	396180	silent	c->t		dehydrogenase/reductase	Rv0330c	branch_(41, 22)
s1518	396199	missense	t->c	L->P	dehydrogenase/reductase	Rv0330c	branch_(10, 9)
s1519	396750	missense	g->a	V->I	dehydrogenase/reductase	Rv0331	branch_(69, 7)
s1520	397275	missense	g->c	A->P	dehydrogenase/reductase	Rv0331	branch_(23, 19)
s1521	397386	intergenic	c->t			IG-Rv0331-Rv0332	branch_(5, 3)
s1522	398034	missense	a->g	E->G	hypothetical protein	Rv0332	branch_(5, 3)
s1523	398374	missense	g->t	V->L	hypothetical protein	Rv0333	branch_(46, 44)
s1524	399581	missense	g->a	A->V	PE family protein	Rv0335c	branch_(37, 5)
s1525	399848	missense	t->g	H->P	PE family protein	Rv0335c	branch_(47, 38)
s1526	401575	missense	c->a	R->S	13E12 repeat family protein	Rv0336	branch_(46, 44)
s1527	401757	intergenic	g->a			IG-Rv0336-Rv0337c	branch_(76, 74)
s1528	401836	intergenic	c->t			IG-Rv0336-Rv0337c	branch_(38, 37)
s1529	402379	missense	c->a	G->W	aminotransferase AlaT	Rv0337c	branch_(42, 23)
s1530	402822	missense	c->g	G->A	aminotransferase AlaT	Rv0337c	branch_(60, 59)
s1531	402836	silent	g->a		aminotransferase AlaT	Rv0337c	branch_(62, 10)
s1532	402881	silent	g->a		aminotransferase AlaT	Rv0337c	branch_(37, 5)
s1533	403126	intergenic	g->a			IG-Rv0337c-Rv0338c	branch_(57, 43)
s1534	403149	intergenic	c->t			IG-Rv0337c-Rv0338c	branch_(68, 12)
s1535	403850	silent	c->t		iron-sulfur-binding reductase	Rv0338c	branch_(42, 23)
s1536	403920	missense	c->t	R->H	iron-sulfur-binding reductase	Rv0338c	branch_(27, 26)
s1537	403980	missense	g->a	A->V	iron-sulfur-binding reductase	Rv0338c	branch_(52, 21)
s1538	404326	missense	t->c	R->G	iron-sulfur-binding reductase	Rv0338c	branch_(52, 21)
s1539	404338	missense	g->a	L->F	iron-sulfur-binding reductase	Rv0338c	branch_(42, 23)
s1540	404496	missense	g->a	S->L	iron-sulfur-binding reductase	Rv0338c	branch_(82, 8)
s1541	404900	silent	c->t		iron-sulfur-binding reductase	Rv0338c	branch_(65, 63)
s1542	405274	missense	g->t	L->I	iron-sulfur-binding reductase	Rv0338c	branch_(43, 37)
s1543	405400	missense	a->g	Y->H	iron-sulfur-binding reductase	Rv0338c	branch_(51, 24)
s1544	405404	silent	c->t		iron-sulfur-binding reductase	Rv0338c	branch_(79, 77)
s1545	405750	missense	t->g	Y->S	iron-sulfur-binding reductase	Rv0338c	branch_(51, 24)
s1546	405788	silent	c->a		iron-sulfur-binding reductase	Rv0338c	branch_(7, 6)
s1547	405854	intergenic	c->g			IG-Rv0338c-Rv0339c	branch_(6, 5)
s1548	411913	missense	c->t	A->V	isoniazid inductible gene protein INIA	Rv0342	branch_(81, 58)
s1549	412017	missense	c->g	Q->E	isoniazid inductible gene protein INIA	Rv0342	branch_(41, 22)
s1550	412197	silent	c->t		isoniazid inductible gene protein INIA	Rv0342	branch_(80, 70)
s1551	412280	missense	t->g	H->Q	isoniazid inductible gene protein INIA	Rv0342	branch_(9, 8)
s1552	412339	missense	c->g	S->W	isoniazid inductible gene protein INIA	Rv0342	branch_(33, 27)
s1553	412842	missense	a->g	D->G	isoniazid inductible gene protein INIC	Rv0343	branch_(82, 8)
s1554	414486	silent	c->t		lipoprotein LpqJ	Rv0344c	branch_(52, 21)
s1555	414492	silent	g->t		lipoprotein LpqJ	Rv0344c	branch_(80, 70)
s1556	414876	silent	g->c		lipoprotein LpqJ	Rv0344c	branch_(59, 58)
s1557	415061	silent	g->a		hypothetical protein	Rv0345	branch_(74, 70)
s1558	415129	missense	a->g	D->G	hypothetical protein	Rv0345	branch_(68, 12)
s1559	415185	missense	a->t	I->F	hypothetical protein	Rv0345	branch_(4, 3)
s1560	416350	missense	t->c	I->V	L-asparagine ABC transporter permease	Rv0346c	branch_(80, 70)
s1561	417288	intergenic	c->t			IG-Rv0346c-Rv0347	branch_(57, 43)
s1562	417348	silent	t->c		hypothetical protein	Rv0347	branch_(34, 15)
s1563	417404	missense	g->t	R->L	hypothetical protein	Rv0347	branch_(65, 63)
s1564	418813	missense	c->t	T->I	transcriptional regulatory protein	Rv0348	branch_(79, 77)
s1565	418818	missense	a->c	T->P	transcriptional regulatory protein	Rv0348	branch_(81, 58)
s1566	418942	missense	g->a	RA->QA	transcriptional regulatory protein	Rv0348	branch_(38, 37)
s1567	419387	missense	a->g	T->A	hypothetical protein	Rv0349	branch_(49, 22)
s1568	419660	intergenic	g->a			IG-Rv0349-Rv0350	branch_(57, 43)
s1569	419744	intergenic	a->c			IG-Rv0349-Rv0350	branch_(44, 43)
s1570	420008	silent	a->g		molecular chaperone DnaK	Rv0350	branch_(52, 21)
s1571	420243	missense	g->a	A->T	molecular chaperone DnaK	Rv0350	branch_(82, 8)
s1572	420308	silent	c->t		molecular chaperone DnaK	Rv0350	branch_(57, 43)
s1573	420405	missense	c->t	R->C	molecular chaperone DnaK	Rv0350	branch_(69, 7)
s1574	421447	missense	a->g	E->G	molecular chaperone DnaK	Rv0350	branch_(40, 24)
s1575	421479	missense	g->a	A->T	molecular chaperone DnaK	Rv0350	branch_(67, 12)
s1576	422379	missense	c->t	S->L	heat shock protein GrpE	Rv0351	branch_(5, 3)
s1577	422678	missense	g->a	R->H	chaperone protein DnaJ	Rv0352	branch_(62, 10)
s1578	422745	silent	t->c		chaperone protein DnaJ	Rv0352	branch_(7, 6)
s1579	423014	missense	g->a	G->D	chaperone protein DnaJ	Rv0352	branch_(40, 24)
s1580	423174	silent	c->t		chaperone protein DnaJ	Rv0352	branch_(68, 12)
s1581	423262	missense	g->a	G->S	chaperone protein DnaJ	Rv0352	branch_(44, 43)
s1582	423289	missense	a->g	T->A	chaperone protein DnaJ	Rv0352	branch_(3, 0)
s1583	423334	missense	g->a	D->N	chaperone protein DnaJ	Rv0352	branch_(70, 69)
s1584	424250	missense	a->g	F->S	Protein encoding sequence predicted by BioNumerics	Rv0353	branch_(69, 7)
s1585	424424	missense	c->a	RA->LS	Protein encoding sequence predicted by BioNumerics	Rv0354c	branch_(51, 24)
s1586	424506	missense	g->t	PF->TL	Protein encoding sequence predicted by BioNumerics	Rv0354c	branch_(40, 24)
s1587	424932	missense	t->a	I->F	PPE family protein	Rv0355c	branch_(9, 8)
s1588	424981	silent	g->a		PPE family protein	Rv0355c	branch_(11, 10)
s1589	425214	missense	c->t	G->S	PPE family protein	Rv0355c	branch_(43, 37)
s1590	425447	missense	g->a	S->F	PPE family protein	Rv0355c	branch_(81, 58)
s1591	425450	missense	c->t	S->D	PPE family protein	Rv0355c	branch_(81, 58)
s1592	425451	missense	t->c	S->D	PPE family protein	Rv0355c	branch_(81, 58)
s1593	425477	missense	a->t	F->Y	PPE family protein	Rv0355c	branch_(81, 58)
s1594	425480	missense	t->a	D->V	PPE family protein	Rv0355c	branch_(81, 58)
s1595	425805	missense	t->g	M->L	PPE family protein	Rv0355c	branch_(49, 22)
s1596	425871	missense	c->g	G->R	PPE family protein	Rv0355c	branch_(17, 16)
s1597	426053	missense	t->g	D->A	PPE family protein	Rv0355c	branch_(81, 58)
s1598	426181	missense	g->t	F->L	PPE family protein	Rv0355c	branch_(43, 37)
s1599	426212	missense	a->g	I->T	PPE family protein	Rv0355c	branch_(80, 70)
s1600	426422	missense	c->t	G->D	PPE family protein	Rv0355c	branch_(38, 37)
s1601	426909	missense	a->c	W->G	PPE family protein	Rv0355c	branch_(56, 53)
s1602	427471	silent	t->g		PPE family protein	Rv0355c	branch_(5, 3)
s1603	427657	silent	c->t		PPE family protein	Rv0355c	branch_(35, 26)
s1604	427684	silent	g->a		PPE family protein	Rv0355c	branch_(39, 14)
s1605	428384	missense	c->t	G->D	PPE family protein	Rv0355c	branch_(77, 69)
s1606	428698	silent	c->t		PPE family protein	Rv0355c	branch_(19, 9)
s1607	428830	missense	a->c	N->K	PPE family protein	Rv0355c	branch_(76, 74)
s1608	428840	missense	c->t	G->D	PPE family protein	Rv0355c	branch_(42, 23)
s1609	428921	missense	g->a	S->F	PPE family protein	Rv0355c	branch_(62, 10)
s1610	429060	missense	t->c	N->D	PPE family protein	Rv0355c	branch_(4, 3)
s1611	429247	silent	c->t		PPE family protein	Rv0355c	branch_(36, 25)
s1612	429981	missense	t->c	T->A	PPE family protein	Rv0355c	branch_(49, 22)
s1613	430332	missense	a->g	F->L	PPE family protein	Rv0355c	branch_(48, 13)
s1614	430653	missense	c->t	G->S	PPE family protein	Rv0355c	branch_(37, 5)
s1615	430749	missense	c->a	A->S	PPE family protein	Rv0355c	branch_(80, 70)
s1616	430756	silent	g->a		PPE family protein	Rv0355c	branch_(42, 23)
s1617	431102	missense	g->c	A->G	PPE family protein	Rv0355c	branch_(74, 70)
s1618	431219	missense	c->g	G->A	PPE family protein	Rv0355c	branch_(82, 8)
s1619	431323	silent	g->t		PPE family protein	Rv0355c	branch_(37, 5)
s1620	431653	silent	c->t		PPE family protein	Rv0355c	branch_(47, 38)
s1621	431841	missense	c->t	G->S	PPE family protein	Rv0355c	branch_(57, 43)
s1622	431871	missense	c->t	G->S	PPE family protein	Rv0355c	branch_(38, 37)
s1623	432091	silent	c->a		PPE family protein	Rv0355c	branch_(80, 70)
s1624	432195	missense	t->c	I->V	PPE family protein	Rv0355c	branch_(72, 71)
s1625	432459	missense	c->t	D->N	PPE family protein	Rv0355c	branch_(62, 10)
s1626	432536	missense	c->t	G->D	PPE family protein	Rv0355c	branch_(15, 14)
s1627	432874	silent	t->g		PPE family protein	Rv0355c	branch_(34, 15)
s1628	433440	missense	a->c	F->V	PPE family protein	Rv0355c	branch_(58, 6)
s1629	433539	missense	t->c	M->V	PPE family protein	Rv0355c	branch_(82, 8)
s1630	433654	silent	g->a		PPE family protein	Rv0355c	branch_(41, 22)
s1631	433986	missense	t->g	I->L	PPE family protein	Rv0355c	branch_(40, 24)
s1632	434023	silent	c->t		PPE family protein	Rv0355c	branch_(68, 12)
s1633	434327	missense	a->g	V->A	PPE family protein	Rv0355c	branch_(69, 7)
s1634	435190	silent	c->t		hypothetical protein	Rv0356c	branch_(42, 23)
s1635	435708	silent	g->a		adenylosuccinate synthetase	Rv0357c	branch_(41, 22)
s1636	436203	silent	c->g		adenylosuccinate synthetase	Rv0357c	branch_(57, 43)
s1637	437465	missense	g->c	SR->SP	hypothetical protein	Rv0358	branch_(4, 3)
s1638	437669	missense	c->t	A->V	integral membrane protein	Rv0359	branch_(48, 13)
s1639	438045	silent	g->a		integral membrane protein	Rv0359	branch_(75, 74)
s1640	438158	missense	t->g	L->R	integral membrane protein	Rv0359	branch_(42, 23)
s1641	438271	missense	g->a	A->T	integral membrane protein	Rv0359	branch_(9, 8)
s1642	438368	missense	c->a	E->D	hypothetical protein	Rv0360c	branch_(81, 58)
s1643	438470	silent	c->t		hypothetical protein	Rv0360c	branch_(62, 10)
s1644	438732	missense	t->a	KL->M	hypothetical protein	Rv0360c	branch_(50, 38)
s1645	439711	intergenic	t->c			IG-Rv0361-Rv0362	branch_(69, 7)
s1646	439857	intergenic	c->a			IG-Rv0361-Rv0362	branch_(79, 77)
s1647	440235	missense	c->t	A->V	Mg2+ transport transmembrane protein MgtE	Rv0362	branch_(72, 71)
s1648	440365	silent	g->a		Mg2+ transport transmembrane protein MgtE	Rv0362	branch_(62, 10)
s1649	440510	missense	g->t	V->F	Mg2+ transport transmembrane protein MgtE	Rv0362	branch_(77, 69)
s1650	440745	missense	t->c	V->A	Mg2+ transport transmembrane protein MgtE	Rv0362	branch_(4, 3)
s1651	440825	missense	g->a	V->M	Mg2+ transport transmembrane protein MgtE	Rv0362	branch_(64, 62)
s1652	440878	silent	c->t		Mg2+ transport transmembrane protein MgtE	Rv0362	branch_(62, 10)
s1653	441823	silent	c->t		fructose-bisphosphate aldolase	Rv0363c	branch_(15, 14)
s1654	441891	missense	t->c	I->V	fructose-bisphosphate aldolase	Rv0363c	branch_(43, 37)
s1655	442244	missense	t->c	N->S	fructose-bisphosphate aldolase	Rv0363c	branch_(38, 37)
s1656	442468	missense	g->a	G->D	transmembrane protein	Rv0364	branch_(58, 6)
s1657	442971	missense	a->c	I->L	transmembrane protein	Rv0364	branch_(5, 3)
s1658	442988	silent	g->a		transmembrane protein	Rv0364	branch_(78, 77)
s1659	443027	silent	g->t		transmembrane protein	Rv0364	branch_(81, 58)
s1660	443264	missense	c->t	V->M	hypothetical protein	Rv0365c	branch_(82, 8)
s1661	443277	missense	a->c	D->E	hypothetical protein	Rv0365c	branch_(42, 23)
s1662	443471	missense	c->t	A->T	hypothetical protein	Rv0365c	branch_(58, 6)
s1663	443559	silent	c->a		hypothetical protein	Rv0365c	branch_(5, 3)
s1664	443583	silent	c->t		hypothetical protein	Rv0365c	branch_(46, 44)
s1665	443897	silent	g->a		hypothetical protein	Rv0365c	branch_(43, 37)
s1666	445536	missense	g->t	D->E	hypothetical protein	Rv0368c	branch_(81, 58)
s1667	445668	missense	c->t	M->I	hypothetical protein	Rv0368c	branch_(74, 70)
s1668	445696	silent	g->t		hypothetical protein	Rv0368c	branch_(59, 58)
s1669	445737	silent	c->t		hypothetical protein	Rv0368c	branch_(37, 5)
s1670	445780	missense	c->t	R->H	hypothetical protein	Rv0368c	branch_(19, 9)
s1671	446165	missense	g->c	Q->E	hypothetical protein	Rv0368c	branch_(42, 23)
s1672	446312	missense	c->g	D->H	hypothetical protein	Rv0368c	branch_(67, 12)
s1673	446406	missense	c->g	Q->H	hypothetical protein	Rv0368c	branch_(51, 24)
s1674	446747	intergenic	c->t			IG-Rv0369c-Rv0370c	branch_(77, 69)
s1675	446972	intergenic	g->a			IG-Rv0369c-Rv0370c	branch_(81, 58)
s1676	447525	missense	g->c	I->M	oxidoreductase	Rv0370c	branch_(69, 7)
s1677	447535	missense	c->t	C->Y	oxidoreductase	Rv0370c	branch_(67, 12)
s1678	447642	silent	g->c		oxidoreductase	Rv0370c	branch_(62, 10)
s1679	448309	missense	c->g	V->L	hypothetical protein	Rv0371c	branch_(79, 77)
s1680	448482	missense	a->g	L->P	hypothetical protein	Rv0371c	branch_(39, 14)
s1681	448905	missense	c->t	G->S	hypothetical protein	Rv0372c	branch_(4, 3)
s1682	449098	silent	c->a		hypothetical protein	Rv0372c	branch_(46, 44)
s1683	449825	missense	c->t	G->D	carbon monoxyde dehydrogenase large subunit	Rv0373c	branch_(81, 58)
s1684	450115	silent	c->t		carbon monoxyde dehydrogenase large subunit	Rv0373c	branch_(5, 3)
s1685	450148	silent	c->t		carbon monoxyde dehydrogenase large subunit	Rv0373c	branch_(46, 44)
s1686	450624	missense	g->a	R->W	carbon monoxyde dehydrogenase large subunit	Rv0373c	branch_(39, 14)
s1687	450640	silent	c->t		carbon monoxyde dehydrogenase large subunit	Rv0373c	branch_(33, 27)
s1688	450935	missense	c->t	W->*	carbon monoxyde dehydrogenase large subunit	Rv0373c	branch_(50, 38)
s1689	451029	missense	c->a	D->Y	carbon monoxyde dehydrogenase large subunit	Rv0373c	branch_(77, 69)
s1690	451136	missense	g->t	T->N	carbon monoxyde dehydrogenase large subunit	Rv0373c	branch_(79, 77)
s1691	451423	silent	g->a		carbon monoxyde dehydrogenase large subunit	Rv0373c	branch_(74, 70)
s1692	451439	missense	a->g	F->S	carbon monoxyde dehydrogenase large subunit	Rv0373c	branch_(5, 3)
s1693	451720	missense	c->t	M->I	carbon monoxyde dehydrogenase large subunit	Rv0373c	branch_(39, 14)
s1694	451827	missense	c->t	A->T	carbon monoxyde dehydrogenase large subunit	Rv0374c	branch_(5, 3)
s1695	452078	missense	c->a	R->L	carbon monoxyde dehydrogenase large subunit	Rv0374c	branch_(46, 44)
s1696	452283	intergenic	t->c			IG-Rv0374c-Rv0375c	branch_(39, 14)
s1697	452288	intergenic	c->t			IG-Rv0374c-Rv0375c	branch_(69, 7)
s1698	452730	missense	t->c	D->G	carbon monoxyde dehydrogenase medium subunit	Rv0375c	branch_(43, 37)
s1699	452754	missense	g->t	S->*	carbon monoxyde dehydrogenase medium subunit	Rv0375c	branch_(80, 70)
s1700	453299	silent	a->g		hypothetical protein	Rv0376c	branch_(80, 70)
s1701	456189	intergenic	c->a			IG-Rv0379-Rv0380c	branch_(82, 8)
s1702	456281	missense	c->t	G->D	RNA methyltransferase	Rv0380c	branch_(42, 23)
s1703	456299	missense	c->g	R->P	RNA methyltransferase	Rv0380c	branch_(48, 13)
s1704	456594	missense	t->c	M->V	RNA methyltransferase	Rv0380c	branch_(13, 11)
s1705	456731	missense	c->t	R->H	RNA methyltransferase	Rv0380c	branch_(58, 6)
s1706	456949	missense	a->g	V->A	hypothetical protein	Rv0381c	branch_(51, 24)
s1707	457032	silent	t->c		hypothetical protein	Rv0381c	branch_(36, 25)
s1708	457372	missense	g->t	P->Q	hypothetical protein	Rv0381c	branch_(37, 5)
s1709	457426	missense	t->c	K->R	hypothetical protein	Rv0381c	branch_(48, 13)
s1710	458116	missense	c->t	D->N	orotate phosphoribosyltransferase	Rv0382c	branch_(59, 58)
s1711	458282	silent	a->g		orotate phosphoribosyltransferase	Rv0382c	branch_(56, 53)
s1712	459322	intergenic	t->c			IG-Rv0383c-Rv0384c	branch_(47, 38)
s1713	459381	intergenic	t->g			IG-Rv0383c-Rv0384c	branch_(55, 52)
s1714	460413	silent	c->t		endopeptidase ATP binding protein	Rv0384c	branch_(16, 15)
s1715	461802	silent	c->t		endopeptidase ATP binding protein	Rv0384c	branch_(84, 82)
s1716	462393	missense	g->a	G->S	hypothetical protein	Rv0385	branch_(57, 43)
s1717	462602	silent	c->t		hypothetical protein	Rv0385	branch_(76, 74)
s1718	463364	intergenic	t->g			IG-Rv0385-Rv0386	branch_(75, 74)
s1719	463503	missense	g->a	M->I	LuxR/UHPA family transcriptional regulator	Rv0386	branch_(57, 43)
s1720	464480	missense	g->a	R->Q	LuxR/UHPA family transcriptional regulator	Rv0386	branch_(59, 58)
s1721	464735	missense	g->t	R->L	LuxR/UHPA family transcriptional regulator	Rv0386	branch_(48, 13)
s1722	464739	silent	c->t		LuxR/UHPA family transcriptional regulator	Rv0386	branch_(64, 62)
s1723	464914	missense	g->a	E->K	LuxR/UHPA family transcriptional regulator	Rv0386	branch_(71, 70)
s1724	464958	silent	c->t		LuxR/UHPA family transcriptional regulator	Rv0386	branch_(59, 58)
s1725	465300	silent	c->t		LuxR/UHPA family transcriptional regulator	Rv0386	branch_(13, 11)
s1726	465697	missense	g->c	V->L	LuxR/UHPA family transcriptional regulator	Rv0386	branch_(74, 70)
s1727	465864	silent	c->t		LuxR/UHPA family transcriptional regulator	Rv0386	branch_(57, 43)
s1728	468357	missense	a->g	E->G	phosphoribosylglycinamide formyltransferase 2	Rv0389	branch_(9, 8)
s1729	468392	missense	g->a	A->T	phosphoribosylglycinamide formyltransferase 2	Rv0389	branch_(46, 44)
s1730	468582	missense	t->c	V->A	phosphoribosylglycinamide formyltransferase 2	Rv0389	branch_(33, 27)
s1731	469042	silent	c->t		phosphoribosylglycinamide formyltransferase 2	Rv0389	branch_(69, 7)
s1732	469072	silent	c->t		phosphoribosylglycinamide formyltransferase 2	Rv0389	branch_(44, 43)
s1733	469329	missense	t->c	ID->TD	phosphoribosylglycinamide formyltransferase 2	Rv0389	branch_(5, 3)
s1734	471263	silent	t->c		membrane NADH dehydrogenase	Rv0392c	branch_(72, 71)
s1735	471469	missense	c->t	G->R	membrane NADH dehydrogenase	Rv0392c	branch_(72, 71)
s1736	471666	missense	a->g	M->T	membrane NADH dehydrogenase	Rv0392c	branch_(69, 7)
s1737	471918	missense	a->g	V->A	membrane NADH dehydrogenase	Rv0392c	branch_(5, 3)
s1738	472224	missense	t->a	K->M	membrane NADH dehydrogenase	Rv0392c	branch_(57, 43)
s1739	472471	silent	g->a		membrane NADH dehydrogenase	Rv0392c	branch_(72, 71)
s1740	472705	missense	t->c	R->AR	membrane NADH dehydrogenase	Rv0392c	branch_(25, 20)
s1741	472794	missense	g->c	R->P	13E12 repeat family protein	Rv0393	branch_(45, 44)
s1742	472898	missense	g->a	A->T	13E12 repeat family protein	Rv0393	branch_(60, 59)
s1743	473689	silent	g->a		13E12 repeat family protein	Rv0393	branch_(5, 3)
s1744	473760	missense	c->t	T->I	13E12 repeat family protein	Rv0393	branch_(82, 8)
s1745	474959	missense	g->a	RG->RD	hypothetical protein	Rv0395	branch_(67, 12)
s1746	475381	missense	g->a	R->WH	hypothetical protein	Rv0396	branch_(40, 24)
s1747	475563	missense	c->a	P->T	hypothetical protein	Rv0396	branch_(80, 70)
s1748	475651	missense	c->t	P->L	hypothetical protein	Rv0396	branch_(68, 12)
s1749	476279	intergenic	c->a			IG-Rv0397-Rv4003	branch_(67, 12)
s1750	476582	intergenic	g->t			IG-Rv4003-Rv0398c	branch_(43, 37)
s1751	476612	intergenic	g->a			IG-Rv4003-Rv0398c	branch_(62, 10)
s1752	477517	missense	a->g	M->T	lipoprotein LpqK	Rv0399c	branch_(61, 59)
s1753	477634	missense	t->c	E->G	lipoprotein LpqK	Rv0399c	branch_(37, 5)
s1754	477682	missense	g->c	S->W	lipoprotein LpqK	Rv0399c	branch_(28, 27)
s1755	477988	missense	t->g	H->P	lipoprotein LpqK	Rv0399c	branch_(59, 58)
s1756	478358	missense	c->t	E->K	lipoprotein LpqK	Rv0399c	branch_(35, 26)
s1757	479350	missense	t->c	D->G	acyl-CoA dehydrogenase FADE7	Rv0400c	branch_(58, 6)
s1758	479591	missense	c->a	V->F	acyl-CoA dehydrogenase FADE7	Rv0400c	branch_(73, 71)
s1759	479632	missense	g->t	T->N	acyl-CoA dehydrogenase FADE7	Rv0400c	branch_(27, 26)
s1760	480103	intergenic	g->c			IG-Rv0401-Rv0402c	branch_(68, 12)
s1761	480239	intergenic	c->g			IG-Rv0401-Rv0402c	branch_(59, 58)
s1762	480890	missense	c->g	G->A	transmembrane transport protein MmpL1	Rv0402c	branch_(80, 70)
s1763	481880	missense	a->g	L->P	transmembrane transport protein MmpL1	Rv0402c	branch_(5, 3)
s1764	482106	missense	g->a	R->*	transmembrane transport protein MmpL1	Rv0402c	branch_(59, 58)
s1765	482545	silent	c->a		transmembrane transport protein MmpL1	Rv0402c	branch_(72, 71)
s1766	482789	missense	c->a	G->V	transmembrane transport protein MmpL1	Rv0402c	branch_(82, 8)
s1767	483536	missense	t->a	T->S	membrane protein	Rv0403c	branch_(81, 58)
s1768	483935	intergenic	t->g			IG-Rv0403c-Rv0404	branch_(20, 19)
s1769	490792	silent	c->t		F420-dependent glucose-6-phosphate dehydrogenase	Rv0407	branch_(60, 59)
s1770	490972	missense	c->a	R->S	F420-dependent glucose-6-phosphate dehydrogenase	Rv0407	branch_(72, 71)
s1771	491112	silent	g->t		F420-dependent glucose-6-phosphate dehydrogenase	Rv0407	branch_(39, 14)
s1772	491591	missense	a->t	K->M	F420-dependent glucose-6-phosphate dehydrogenase	Rv0407	branch_(42, 23)
s1773	491668	missense	a->g	K->E	F420-dependent glucose-6-phosphate dehydrogenase	Rv0407	branch_(43, 37)
s1774	491742	missense	t->c	F->FS	F420-dependent glucose-6-phosphate dehydrogenase	Rv0407	branch_(19, 9)
s1775	492150	missense	g->c	G->A	phosphate acetyltransferase	Rv0408	branch_(19, 9)
s1776	492655	silent	g->a		phosphate acetyltransferase	Rv0408	branch_(69, 7)
s1777	492739	silent	c->t		phosphate acetyltransferase	Rv0408	branch_(82, 8)
s1778	493141	silent	g->a		phosphate acetyltransferase	Rv0408	branch_(41, 22)
s1779	493156	silent	c->t		phosphate acetyltransferase	Rv0408	branch_(40, 24)
s1780	493934	silent	t->g, t->c		acetate kinase	Rv0409	branch_(41, 22)	branch_(80, 70)
s1781	494270	silent	c->t		acetate kinase	Rv0409	branch_(3, 0)
s1782	494685	silent	a->c		acetate kinase	Rv0409	branch_(7, 6)
s1783	494915	missense	c->a	D->E	acetate kinase	Rv0409	branch_(43, 37)
s1784	495104	silent	c->t		serine/threonine-protein kinase PKNG (protein kinase G) (STPK G)	Rv0410c	branch_(40, 24)
s1785	495108	missense	g->t	T->K	serine/threonine-protein kinase PKNG (protein kinase G) (STPK G)	Rv0410c	branch_(43, 37)
s1786	495198	missense	a->g	F->S	serine/threonine-protein kinase PKNG (protein kinase G) (STPK G)	Rv0410c	branch_(77, 69)
s1787	495322	missense	c->t	A->T	serine/threonine-protein kinase PKNG (protein kinase G) (STPK G)	Rv0410c	branch_(58, 6)
s1788	495473	silent	c->t		serine/threonine-protein kinase PKNG (protein kinase G) (STPK G)	Rv0410c	branch_(69, 7)
s1789	496284	missense	g->t	T->N	serine/threonine-protein kinase PKNG (protein kinase G) (STPK G)	Rv0410c	branch_(82, 8)
s1790	496343	silent	c->t		serine/threonine-protein kinase PKNG (protein kinase G) (STPK G)	Rv0410c	branch_(46, 44)
s1791	496700	silent	c->g		serine/threonine-protein kinase PKNG (protein kinase G) (STPK G)	Rv0410c	branch_(46, 44)
s1792	496707	missense	g->t	A->X	serine/threonine-protein kinase PKNG (protein kinase G) (STPK G)	Rv0410c	branch_(18, 16)
s1793	496840	missense	g->a	H->Y	serine/threonine-protein kinase PKNG (protein kinase G) (STPK G)	Rv0410c	branch_(80, 70)
s1794	497000	missense	g->t	F->L	serine/threonine-protein kinase PKNG (protein kinase G) (STPK G)	Rv0410c	branch_(76, 74)
s1795	497108	silent	c->t		serine/threonine-protein kinase PKNG (protein kinase G) (STPK G)	Rv0410c	branch_(5, 3)
s1796	497491	silent	g->a		glutamine-binding lipoprotein	Rv0411c	branch_(11, 10)
s1797	497842	missense	c->a	K->N	glutamine-binding lipoprotein	Rv0411c	branch_(64, 62)
s1798	498531	silent	a->g		hypothetical protein	Rv0412c	branch_(19, 9)
s1799	498557	missense	c->a	D->Y	hypothetical protein	Rv0412c	branch_(21, 20)
s1800	498932	missense	g->t	R->S	hypothetical protein	Rv0412c	branch_(82, 8)
s1801	499196	missense	c->t	A->T	hypothetical protein	Rv0412c	branch_(74, 70)
s1802	500223	missense	g->t	V->L	7,8-dihydro-8-oxoguanine-triphosphatase	Rv0413	branch_(58, 6)
s1803	501120	silent	g->t		thiamine biosynthesis oxidoreductase ThiO	Rv0414c	branch_(50, 38)
s1804	501517	missense	g->a	E->K	thiamine biosynthesis oxidoreductase ThiO	Rv0415	branch_(58, 6)
s1805	501535	missense	g->t	V->F	thiamine biosynthesis oxidoreductase ThiO	Rv0415	branch_(27, 26)
s1806	501615	silent	c->g		thiamine biosynthesis oxidoreductase ThiO	Rv0415	branch_(24, 23)
s1807	501620	missense	c->t	A->V	thiamine biosynthesis oxidoreductase ThiO	Rv0415	branch_(4, 3)
s1808	501720	silent	t->c		thiamine biosynthesis oxidoreductase ThiO	Rv0415	branch_(74, 70)
s1809	502318	intergenic	g->c			IG-Rv0416-Rv0417	branch_(80, 70)
s1810	502452	silent	g->a		thiazole synthase	Rv0417	branch_(60, 59)
s1811	502589	missense	c->g	S->C	thiazole synthase	Rv0417	branch_(52, 21)
s1812	502611	silent	c->t		thiazole synthase	Rv0417	branch_(81, 58)
s1813	502779	silent	g->t		thiazole synthase	Rv0417	branch_(75, 74)
s1814	502881	missense	g->a	M->I	thiazole synthase	Rv0417	branch_(82, 8)
s1815	503354	intergenic	g->c			IG-Rv0417-Rv0418	branch_(52, 21)
s1816	503647	missense	g->a	R->Q	lipoprotein aminopeptidase LpqL	Rv0418	branch_(74, 70)
s1817	504811	missense	c->g	A->G	lipoprotein aminopeptidase LpqL	Rv0418	branch_(50, 38)
s1818	504878	silent	g->t		lipoprotein aminopeptidase LpqL	Rv0418	branch_(38, 37)
s1819	505302	missense	g->a	A->T	lipoprotein peptidase LpqM	Rv0419	branch_(3, 0)
s1820	505843	missense	a->g	E->G	lipoprotein peptidase LpqM	Rv0419	branch_(48, 13)
s1821	505974	missense	g->a	A->T	lipoprotein peptidase LpqM	Rv0419	branch_(19, 9)
s1822	506125	missense	c->t	A->V	lipoprotein peptidase LpqM	Rv0419	branch_(68, 12)
s1823	506567	silent	c->t		lipoprotein peptidase LpqM	Rv0420c	branch_(66, 63)
s1824	506569	missense	g->a	R->QW	lipoprotein peptidase LpqM	Rv0420c	branch_(50, 38)
s1825	506910	missense	c->t	G->E	transmembrane protein	Rv0420c	branch_(4, 3)
s1826	507669	silent	g->a		hypothetical protein	Rv0421c	branch_(57, 43)
s1827	507989	silent	c->t		phosphomethylpyrimidine kinase	Rv0422c	branch_(43, 37)
s1828	508058	silent	a->g		phosphomethylpyrimidine kinase	Rv0422c	branch_(57, 43)
s1829	508435	missense	c->t	V->I	phosphomethylpyrimidine kinase	Rv0422c	branch_(77, 69)
s1830	508639	missense	t->g	E->D	thiamine biosynthesis protein ThiC	Rv0423c	branch_(17, 16)
s1831	508644	missense	c->t	A->T	thiamine biosynthesis protein ThiC	Rv0423c	branch_(80, 70)
s1832	510047	missense	g->a	T->M	thiamine biosynthesis protein ThiC	Rv0423c	branch_(50, 38)
s1833	510103	missense	g->t	H->Q	thiamine biosynthesis protein ThiC	Rv0423c	branch_(46, 44)
s1834	510260	intergenic	t->c			IG-Rv0423c-Rv0424c	branch_(39, 14)
s1835	511518	silent	t->g		metal cation transporting P-type ATPase CtpH	Rv0425c	branch_(56, 53)
s1836	511791	silent	c->t		metal cation transporting P-type ATPase CtpH	Rv0425c	branch_(39, 14)
s1837	513257	missense	t->c	M->V	metal cation transporting P-type ATPase CtpH	Rv0425c	branch_(52, 21)
s1838	514098	silent	c->t		metal cation transporting P-type ATPase CtpH	Rv0425c	branch_(43, 37)
s1839	514245	silent	c->t		metal cation transporting P-type ATPase CtpH	Rv0425c	branch_(24, 23)
s1840	514890	silent	g->a		metal cation transporting P-type ATPase CtpH	Rv0425c	branch_(46, 44)
s1841	514981	missense	c->t	R->H	metal cation transporting P-type ATPase CtpH	Rv0425c	branch_(57, 43)
s1842	515125	missense	t->g	N->T	metal cation transporting P-type ATPase CtpH	Rv0425c	branch_(36, 25)
s1843	515321	missense	t->c	M->V	metal cation transporting P-type ATPase CtpH	Rv0425c	branch_(46, 44)
s1844	515379	silent	g->t		hypothetical protein	Rv0426c	branch_(36, 25)
s1845	515527	missense	g->a	P->L	hypothetical protein	Rv0426c	branch_(17, 16)
s1846	516257	silent	g->a		exodeoxyribonuclease III protein	Rv0427c	branch_(60, 59)
s1847	516301	missense	c->t	G->S	exodeoxyribonuclease III protein	Rv0427c	branch_(67, 12)
s1848	517111	missense	c->t	GS->S	exodeoxyribonuclease III protein	Rv0428c	branch_(67, 12)
s1849	517220	missense	g->t	GA->GE	exodeoxyribonuclease III protein	Rv0428c	branch_(75, 74)
s1850	517293	missense	a->g	S->P	hypothetical protein	Rv0428c	branch_(67, 12)
s1851	517358	missense	t->c	D->G	hypothetical protein	Rv0428c	branch_(19, 9)
s1852	517389	missense	c->a	V->F	hypothetical protein	Rv0428c	branch_(62, 10)
s1853	517411	silent	a->g		hypothetical protein	Rv0428c	branch_(8, 7)
s1854	517804	missense	t->g	L*->LS	hypothetical protein	Rv0429c	branch_(81, 58)
s1855	518166	silent	g->t		peptide deformylase	Rv0429c	branch_(37, 5)
s1856	518393	missense	c->t	A->T	peptide deformylase	Rv0429c	branch_(4, 3)
s1857	519185	missense	t->g	V->G	tuberculin related peptide	Rv0431	branch_(9, 8)
s1858	519331	missense	a->g	T->A	tuberculin related peptide	Rv0431	branch_(6, 5)
s1859	519806	silent	g->a		periplasmic superoxide dismutase [Cu-Zn] SodC	Rv0432	branch_(4, 3)
s1860	519872	silent	c->t		periplasmic superoxide dismutase [Cu-Zn] SodC	Rv0432	branch_(58, 6)
s1861	520400	missense	t->g	F->C	carboxylate-amine ligase	Rv0433	branch_(71, 70)
s1862	521319	silent	t->c		carboxylate-amine ligase	Rv0433	branch_(5, 3)
s1863	522053	silent	c->a		hypothetical protein	Rv0434	branch_(68, 12)
s1864	522081	missense	a->g	T->A	hypothetical protein	Rv0434	branch_(9, 8)
s1865	522629	silent	a->c		ATPase	Rv0435c	branch_(34, 15)
s1866	522688	missense	g->a	P->S	ATPase	Rv0435c	branch_(44, 43)
s1867	523654	missense	c->t	A->T	ATPase	Rv0435c	branch_(62, 10)
s1868	524327	silent	c->g		ATPase	Rv0435c	branch_(51, 24)
s1869	524802	missense	g->a	P->S	CDP-diacylglycerol--serine O-phosphatidyltransferase	Rv0436c	branch_(43, 37)
s1870	524891	missense	c->a	G->V	CDP-diacylglycerol--serine O-phosphatidyltransferase	Rv0436c	branch_(20, 19)
s1871	525205	silent	g->a		CDP-diacylglycerol--serine O-phosphatidyltransferase	Rv0436c	branch_(59, 58)
s1872	525540	silent	t->g		phosphatidylserine decarboxylase	Rv0437c	branch_(59, 58)
s1873	525833	missense	c->t	V->M	phosphatidylserine decarboxylase	Rv0437c	branch_(42, 23)
s1874	526255	missense	g->a	P->L	molybdopterin biosynthesis protein MoeA2	Rv0438c	branch_(43, 37)
s1875	526406	missense	g->a	P->S	molybdopterin biosynthesis protein MoeA2	Rv0438c	branch_(43, 37)
s1876	526533	missense	t->g	E->D	molybdopterin biosynthesis protein MoeA2	Rv0438c	branch_(82, 8)
s1877	527050	missense	g->a	T->I	molybdopterin biosynthesis protein MoeA2	Rv0438c	branch_(77, 69)
s1878	527316	missense	c->g	M->I	molybdopterin biosynthesis protein MoeA2	Rv0438c	branch_(9, 8)
s1879	528232	missense	c->t	G->D	short-chain dehydrogenase	Rv0439c	branch_(39, 14)
s1880	528354	silent	c->a		short-chain dehydrogenase	Rv0439c	branch_(9, 8)
s1881	528781	silent	g->a		chaperonin GroEL	Rv0440	branch_(77, 69)
s1882	528935	missense	g->a	A->T	chaperonin GroEL	Rv0440	branch_(38, 37)
s1883	529147	silent	c->g		chaperonin GroEL	Rv0440	branch_(37, 5)
s1884	529363	silent	c->t		chaperonin GroEL	Rv0440	branch_(71, 70)
s1885	529681	silent	c->t		chaperonin GroEL	Rv0440	branch_(39, 14)
s1886	530786	missense	t->g	S->R	PPE family protein	Rv0442c	branch_(61, 59)
s1887	531352	missense	c->g	G->A	PPE family protein	Rv0442c	branch_(43, 37)
s1888	531775	missense	c->g	W->S	PPE family protein	Rv0442c	branch_(62, 10)
s1889	531777	missense	c->t	M->I	PPE family protein	Rv0442c	branch_(47, 38)
s1890	532017	silent	c->t		PPE family protein	Rv0442c	branch_(49, 22)
s1891	532097	missense	t->c	K->E	PPE family protein	Rv0442c	branch_(56, 53)
s1892	532127	missense	c->g	A->P	PPE family protein	Rv0442c	branch_(82, 8)
s1893	532179	missense	c->a	E->D	PPE family protein	Rv0442c	branch_(79, 77)
s1894	532192	intergenic	c->t			IG-Rv0442c-Rv0443	branch_(5, 3)
s1895	532738	missense	g->a	V->M	hypothetical protein	Rv0443	branch_(66, 63)
s1896	532927	intergenic	g->c			IG-Rv0443-Rv0444c	branch_(37, 5)
s1897	533118	silent	g->a		hypothetical protein	Rv0444c	branch_(47, 38)
s1898	533239	missense	c->t	G->E	hypothetical protein	Rv0444c	branch_(5, 3)
s1899	533547	missense	c->g	E->D	hypothetical protein	Rv0444c	branch_(14, 13)
s1900	533781	silent	t->c		hypothetical protein	Rv0444c	branch_(36, 25)
s1901	534205	silent	c->t		RNA polymerase sigma factor SigK	Rv0445c	branch_(59, 58)
s1902	534342	missense	c->a	A->S	RNA polymerase sigma factor SigK	Rv0445c	branch_(82, 8)
s1903	534394	missense	c->t	M->I	RNA polymerase sigma factor SigK	Rv0445c	branch_(1, 0)
s1904	534427	intergenic	t->a			IG-Rv0445c-Rv0446c	branch_(9, 8)
s1905	534664	missense	g->t	F->L	transmembrane protein	Rv0446c	branch_(65, 63)
s1906	534691	missense	c->t	W->*	transmembrane protein	Rv0446c	branch_(25, 20)
s1907	534864	missense	g->t	L->M	transmembrane protein	Rv0446c	branch_(77, 69)
s1908	535695	silent	c->t		cyclopropane-fatty-acyl-phospholipid synthase	Rv0447c	branch_(27, 26)
s1909	536070	silent	c->t		cyclopropane-fatty-acyl-phospholipid synthase	Rv0447c	branch_(58, 6)
s1910	536106	silent	t->g		cyclopropane-fatty-acyl-phospholipid synthase	Rv0447c	branch_(39, 14)
s1911	536722	missense	c->t	D->N	hypothetical protein	Rv0448c	branch_(82, 8)
s1912	537051	missense	t->c	D->G	hypothetical protein	Rv0448c	branch_(38, 37)
s1913	538762	silent	c->t		transmembrane transport protein MmpL4	Rv0450c	branch_(43, 37)
s1914	539019	missense	g->a	H->Y	transmembrane transport protein MmpL4	Rv0450c	branch_(58, 6)
s1915	539271	missense	g->c	L->V	transmembrane transport protein MmpL4	Rv0450c	branch_(40, 24)
s1916	539863	silent	a->g		transmembrane transport protein MmpL4	Rv0450c	branch_(5, 3)
s1917	539883	silent	a->g		transmembrane transport protein MmpL4	Rv0450c	branch_(5, 3)
s1918	540349	silent	c->t		transmembrane transport protein MmpL4	Rv0450c	branch_(49, 22)
s1919	540424	silent	g->t		transmembrane transport protein MmpL4	Rv0450c	branch_(82, 8)
s1920	540552	missense	c->t	A->T	transmembrane transport protein MmpL4	Rv0450c	branch_(4, 3)
s1921	540775	silent	c->t		transmembrane transport protein MmpL4	Rv0450c	branch_(80, 70)
s1922	541048	silent	t->g		transmembrane transport protein MmpL4	Rv0450c	branch_(40, 24)
s1923	541094	missense	g->a	A->V	transmembrane transport protein MmpL4	Rv0450c	branch_(76, 74)
s1924	541201	silent	a->g		transmembrane transport protein MmpL4	Rv0450c	branch_(52, 21)
s1925	541505	missense	a->g	L->PL	transmembrane transport protein MmpL4	Rv0451c	branch_(76, 74)
s1926	541646	missense	g->t	H->N	membrane protein	Rv0451c	branch_(50, 38)
s1927	541869	silent	c->t		membrane protein	Rv0451c	branch_(57, 43)
s1928	542014	intergenic	c->g			IG-Rv0451c-Rv0452	branch_(11, 10)
s1929	542514	missense	c->g	H->D	transcriptional regulatory protein	Rv0452	branch_(16, 15)
s1930	542579	silent	g->a		transcriptional regulatory protein	Rv0452	branch_(57, 43)
s1931	542959	intergenic	c->t			IG-Rv0452-Rv0453	branch_(38, 37)	branch_(73, 71)	branch_(77, 69)	branch_(82, 8)
s1932	542977	intergenic	c->t			IG-Rv0452-Rv0453	branch_(72, 71)
s1933	543161	intergenic	t->c			IG-Rv0452-Rv0453	branch_(4, 3)
s1934	544593	missense	g->a	A->T	PPE family protein	Rv0453	branch_(34, 15)
s1935	544683	missense	a->g	M->V	PPE family protein	Rv0453	branch_(36, 25)
s1936	544750	silent	c->t		hypothetical protein	Rv0453	branch_(40, 24)
s1937	544751	missense	g->a	V->I	hypothetical protein	Rv0453	branch_(73, 71)
s1938	545800	missense	g->c	L->V	hypothetical protein	Rv0455c	branch_(82, 8)
s1939	545993	missense	c->g	A->P	enoyl-CoA hydratase	Rv0456c	branch_(73, 71)
s1940	546357	silent	a->g		enoyl-CoA hydratase	Rv0456c	branch_(19, 9)
s1941	546878	intergenic	g->a			IG-Rv0456c-Rv0456A	branch_(60, 59)
s1942	546914	intergenic	g->a			IG-Rv0456c-Rv0456A	branch_(23, 19)
s1943	546938	intergenic	t->c			IG-Rv0456c-Rv0456A	branch_(68, 12)
s1944	547013	intergenic	g->a			IG-Rv0456c-Rv0456A	branch_(37, 5)
s1945	547585	intergenic	g->a			IG-Rv0456A-Rv0457c	branch_(49, 22)
s1946	548101	missense	t->g	K->Q	peptidase	Rv0457c	branch_(76, 74)
s1947	548270	silent	t->c		peptidase	Rv0457c	branch_(40, 24)
s1948	548326	missense	t->c	T->A	peptidase	Rv0457c	branch_(62, 10)
s1949	549074	silent	g->a		peptidase	Rv0457c	branch_(50, 38)
s1950	549144	missense	t->c	E->G	peptidase	Rv0457c	branch_(51, 24)
s1951	549251	missense	c->t	W->*	Protein encoding sequence predicted by BioNumerics	Rv0457c	branch_(69, 7)
s1952	549363	missense	c->g	R->P	peptidase	Rv0457c	branch_(15, 14)
s1953	549554	silent	g->a		peptidase	Rv0457c	branch_(39, 14)
s1954	549671	intergenic	t->c			IG-Rv0457c-Rv0458	branch_(68, 12)
s1955	550205	silent	g->a		aldehyde dehydrogenase	Rv0458	branch_(81, 58)
s1956	550559	silent	c->t		aldehyde dehydrogenase	Rv0458	branch_(49, 22)
s1957	550635	silent	c->t		aldehyde dehydrogenase	Rv0458	branch_(73, 71)
s1958	550803	missense	g->c	G->R	aldehyde dehydrogenase	Rv0458	branch_(48, 13)
s1959	550941	missense	a->g	I->V	aldehyde dehydrogenase	Rv0458	branch_(68, 12)
s1960	551044	missense	t->c	V->A	aldehyde dehydrogenase	Rv0458	branch_(17, 16)
s1961	551090	silent	c->t		aldehyde dehydrogenase	Rv0458	branch_(79, 77)
s1962	551273	missense	c->t	P->S	hypothetical protein	Rv0459	branch_(68, 12)
s1963	551525	silent	a->c		hypothetical protein	Rv0459	branch_(52, 21)
s1964	551532	missense	g->a	R->Q	hypothetical protein	Rv0459	branch_(44, 43)
s1965	551887	intergenic	t->g			IG-Rv0460-Rv0461	branch_(39, 14)
s1966	551999	missense	c->t	R->W	hypothetical protein	Rv0460	branch_(57, 43)
s1967	552044	missense	g->c	G->R	hypothetical protein	Rv0461	branch_(58, 6)
s1968	552085	silent	a->g		hypothetical protein	Rv0461	branch_(56, 53)
s1969	553815	missense	c->t	A->V	dihydrolipoamide dehydrogenase	Rv0462	branch_(50, 38)
s1970	554106	missense	a->g	I->V	hypothetical protein	Rv0463	branch_(81, 58)
s1971	554493	silent	c->a		hypothetical protein	Rv0464c	branch_(59, 58)
s1972	555330	missense	c->t	R->Q	transcriptional regulatory protein	Rv0465c	branch_(4, 3)
s1973	555621	missense	t->g	K->T	transcriptional regulatory protein	Rv0465c	branch_(59, 58)
s1974	555639	missense	g->t	P->Q	transcriptional regulatory protein	Rv0465c	branch_(82, 8)
s1975	555945	missense	t->c	Q->R	transcriptional regulatory protein	Rv0465c	branch_(69, 7)
s1976	555991	missense	a->g	C->R	transcriptional regulatory protein	Rv0465c	branch_(19, 9)
s1977	556035	missense	g->t	P->Q	transcriptional regulatory protein	Rv0465c	branch_(69, 7)
s1978	556089	missense	a->g	V->A	transcriptional regulatory protein	Rv0465c	branch_(43, 37)
s1979	556201	missense	t->c	N->D	transcriptional regulatory protein	Rv0465c	branch_(6, 5)
s1980	556585	missense	a->g	H->R	hypothetical protein	Rv0466	branch_(67, 12)
s1981	557133	missense	g->a	V->I	hypothetical protein	Rv0466	branch_(35, 26)
s1982	557299	intergenic	g->a			IG-Rv0466-Rv0467	branch_(5, 3)
s1983	557541	silent	c->t		isocitrate lyase	Rv0467	branch_(67, 12)
s1984	558075	silent	c->t		isocitrate lyase	Rv0467	branch_(66, 63)
s1985	558109	missense	g->a	G->S	isocitrate lyase	Rv0467	branch_(79, 77)
s1986	558501	silent	c->t		isocitrate lyase	Rv0467	branch_(27, 26)
s1987	558583	missense	g->a	A->T	isocitrate lyase	Rv0467	branch_(57, 43)
s1988	558720	silent	c->t		isocitrate lyase	Rv0467	branch_(3, 0)
s1989	558750	silent	c->t		isocitrate lyase	Rv0467	branch_(59, 58)
s1990	559052	missense	a->c	E->A	3-hydroxybutyryl-CoA dehydrogenase	Rv0468	branch_(28, 27)
s1991	559153	silent	c->t		3-hydroxybutyryl-CoA dehydrogenase	Rv0468	branch_(3, 0)
s1992	559177	missense	g->t	D->Y	3-hydroxybutyryl-CoA dehydrogenase	Rv0468	branch_(60, 59)
s1993	559302	silent	g->a		3-hydroxybutyryl-CoA dehydrogenase	Rv0468	branch_(67, 12)
s1994	559350	silent	g->a		3-hydroxybutyryl-CoA dehydrogenase	Rv0468	branch_(74, 70)
s1995	559926	silent	g->t		mycolic acid synthase	Rv0469	branch_(61, 59)
s1996	560504	missense	c->t	A->V	mycolic acid synthase	Rv0469	branch_(82, 8)
s1997	560521	missense	a->g	K->E	mycolic acid synthase	Rv0469	branch_(48, 13)
s1998	560664	silent	c->t		mycolic acid synthase	Rv0469	branch_(69, 7)
s1999	560666	missense	a->g	K->R	mycolic acid synthase	Rv0469	branch_(69, 7)
[truncated: 11,359 more rows]
