# Supplementary material for: Significance of the Identification in the Horn of Africa of an Exceptionally Deep Branching Mycobacterium tuberculosis Clade
Source: PLoS One. 2012 Dec 27;7(12):e52841. doi: 10.1371/journal.pone.0052841 (PMC3531362; doi:10.1371/journal.pone.0052841)
Supplement: Table S7 — MLVA primers used for the MLVA24Orsay assay. (XLS) [file pone.0052841.s008.xls]

## Sheet: Table S8 MLVA24Orsay primers
>ETR-A Orsay
ATTTCGATCGGGATGTTGAT
>ETR-A Orsay
TCGGTCCCATCACCTTCTTA
>ETR-B
GCGAACACCAGGACAGCATCATG
>ETR-B
GGCATGCCGGTGATCGAGTGG
>ETR-C Orsay
GACTTCAATGCGTTGTTGGA
>ETR-C Orsay
GTCTTGACCTCCACGAGTGC
>ETR-D Orsay (MIRU04)
GCGCGAGAGCCCGAACTGC
>ETR-D Orsay (MIRU04)
GCGCAGCAGAAACGTCAGC
>ETR-E (MIRU31)
ACTGATTGGCTTCATACGGCTTTA
>ETR-E (MIRU31)
GTGCCGACGTGGTCTTGAT
>MIRU2
TGGACTTGCAGCAATGGACCAACT
>MIRU2
TACTCGGACGCCGGCTCAAAAT
>MIRU10
GTTCTTGACCAACTGCAGTCGTCC
>MIRU10
GCCACCTTGGTGATCAGCTACCT
>MIRU16
TCGGTGATCGGGTCCAGTCCAAGTA
>MIRU16
CCCGTCGTGCAGCCCTGGTAC
>MIRU20
TCGGAGAGATGCCCTTCGAGTTAG
>MIRU20
GGAGACCGCGACCAGGTACTTGTA
>MIRU23
CAGCGAAACGAACTGTGCTATCAC
>MIRU23
CGTGTCCGAGCAGAAAAGGGTAT
>MIRU24
CGACCAAGATGTGCAGGAATACAT
>MIRU24
GGGCGAGTTGAGCTCACAGAA
>MIRU26
CCCGCCTTCGAAACGTCGCT
>MIRU26
TGGACATAGGCGACCAGGCGAATA
>MIRU27
TCGAAAGCCTCTGCGTGCCAGTAA
>MIRU27
GCGATGTGAGCGTGCCACTCAA
>MIRU39
CGCATCGACAAACTGGAGCCAAAC
>MIRU39
CGGAAACGTCTACGCCCCACACAT
>MIRU40 Orsay
AAGCGCAAGAGCACCAAG
>MIRU40 Orsay
GTGGGCTTGTACTTGCGAAT
>Mtub01
GAGAAACAGGAGGGCGTTG
>Mtub01
TATTACGACGACCGCTATGC
>Mtub02
CGTGCACAGTTGGGTGTTTA
>Mtub02
TTCGTTCAGGAACTCCAAGG
>Mtub04
GTCCAGGTTGCAAGAGATGG
>Mtub04
GGCATCCTCAACAACGGTAG
>Mtub12
CTCCCACACCCAGGACAC
>Mtub12
CGGCCTACCCAACATTCC
>Mtub21
AGATCCCAGTTGTCGTCGTC
>Mtub21
CAACATCGCCTGGTTCTGTA
>Mtub29
AACCCATGTCAGCCAGGTTA
>Mtub29
ATGATGGCACACCGAAGAAC
>Mtub30
AGTCACCTTTCCTACCACTCGTAAC
>Mtub30
ATTAGTAGGGCACTAGCACCTCAAG
>Mtub31
GTGACGTTTACCGTGCTCTATTTC
>Mtub31
GTCGTCGGACAGTTCTAGCTTT
>Mtub39
AATCACGGTAACTTGGGTTGTTT
>Mtub39
GATGCATGTTCGACCCGTAG
>Qub11_a
CCCATCCCGCTTAGCACATTCGTA
>Qub11-a
TTCAGGGGGGATCCGGGA
